# Supplementary material
Source: PubMed Central journal article supplement (PMC8968294)

# Atroposelective Desymmetrization of Resorcinol-Bearing Quinazolinones via Cu-Catalyzed C–O Bond Formation

Hyung Yoon, Alexandra Galls, Soren D. Rozema, and Scott J. Miller\*  
<Scott.miller@yale.edu>

*Department of Chemistry, Yale University, New Haven, Connecticut, 06520, United States*

## Supporting Information

### Table of Contents

|                                         |    |
|-----------------------------------------|----|
| 1. General consideration.....           | 2  |
| 2. Synthesis of L1.....                 | 3  |
| 3. General procedures.....              | 4  |
| 4. Quinazolinone Starting material..... | 7  |
| 5. Cross Coupled Quinazolinones.....    | 10 |
| 6. Derivatization.....                  | 25 |
| 7. X-ray crystal structures.....        | 32 |
| 8. References.....                      | 48 |
| 9. Spectra.....                         | 49 |

## General Reaction Considerations

Room temperature is considered 20-23 °C. All reactions were performed under regular conditions unless otherwise stated. All reactions were magnetically stirred and elevated temperatures were reported as the temperature of the surrounding oil bath. Reactions were monitored by thin layer chromatography (TLC) [EMD Millipore silica gel 60 F254 precoated plates (0.25 mm thickness)], by crude UPLCMS analysis of a worked up aliquot or by crude <sup>1</sup>H-NMR analysis of a worked up aliquot. TLC visualization was performed under a UV lamp or KMnO<sub>4</sub>/CAM stain developed with heat. Solvent evaporation was conducted by rotary evaporation at the appropriate temperature and pressure. All normal phase flash column chromatography was conducted using silica gel 60 Å (32–63 microns). Reversed phase flash column chromatography was performed using an automated Biotage® Isolera™ One flash purification system equipped with a 12, 30, 60 or 120 g SNAP C18 (HS 50 µm silica) or SNAP Ultra C18 (HP Sphere, 25 µm silica) cartridge. All reported yields reflect spectroscopically (<sup>1</sup>H-NMR) pure material unless otherwise stated.

## Materials

Unless stated otherwise, all reagents were used as received. Tetrahydrofuran (THF), diethyl ether (Et<sub>2</sub>O), dichloromethane (DCM), acetonitrile (MeCN), *N,N*-dimethylformamide (DMF), and Toluene (PhMe) were dried over alumina and dispensed under argon via a Seca solvent purification system by GlassContour. Trimethyl benzene-1,3,5-tricarboxylate was crushed into a fine powder by a mortar and pestle, dried overnight *in vacuo* and stored in a desiccator.

## Analysis

Unless otherwise stated, all NMR data were acquired at ambient temperature. NMR solvents, chloroform-*d* (CDCl<sub>3</sub>), dimethylsulfoxide-*d*<sub>6</sub> (DMSO-*d*<sub>6</sub>), methanol-*d*<sub>4</sub> (CD<sub>3</sub>OD), and dichloromethane-*d*<sub>2</sub> (CD<sub>2</sub>Cl<sub>2</sub>) were purchased from Cambridge Isotopes and used as received. DMSO-*d*<sub>6</sub>/CD<sub>3</sub>OD ampules were used immediately upon opening. NMR spectra were obtained on Agilent 400 MHz, 500 MHz or 600 MHz spectrometers. Measurements were carried out at 23 °C and chemical shifts (δ) are reported as parts per million (ppm). The solvent resonance was used as the internal standard for <sup>1</sup>H-NMR (chloroform at 7.26 ppm, methanol at 3.31 ppm, and DMSO at 2.50 ppm) and <sup>13</sup>C-NMR (chloroform at 77.0 ppm, methanol at 49.0 ppm, and DMSO at 39.5 ppm). The *J* values are reported in hertz (Hz) and multiplicities are abbreviated as follows: singlet (s), doublet (d), triplet (t), quartet (q), pentet (p), multiplet (m) and broad (br). Ultra high-performance liquid chromatography-mass spectrometry (UPLC/MS) was performed on a Waters Acquity SQD2 instrument equipped with an Ultra BEH C-18 column (1.7 µm particle size, 2.1 x 50 mm), a dual atmospheric pressure chemical ionization (API)/electrospray ionization S4 (ESI) mass spectrometry detector, and a photodiode array detector. High-resolution mass spectrometry (HRMS) was conducted by the Chemical and Biophysical Instrumentation Center in the chemistry department at Yale University, on a Waters Xevo Q-TOF high-resolution Mass Spectrometry using ESI. Infrared spectra were recorded on a Nicolet 6700 ATR/FT-ATR spectrometer, and select  $\nu_{\max}$  are reported in cm<sup>-1</sup>. Optical rotations were recorded on an Autopol VI Automatic Polarimeter at the sodium D-line (589 nm), unless otherwise indicated, using a Type 40T TempTrol™ cell of 0.50 dm path length at 25 °C and reported as follows:  $[\alpha]_{\lambda}^{\text{temp}}$ , concentration (c, in g/100 mL), and solvent. Analytical normal-phase high-performance liquid chromatography (HPLC) was performed using an Agilent 1100 series instrument equipped with a photodiode array detector (210 nm and 230 nm) and columns (chiral supports, 5 µm particle size, 4.6 x 250 mm) from Daicel Chemical Industries.

## Synthesis of L1:

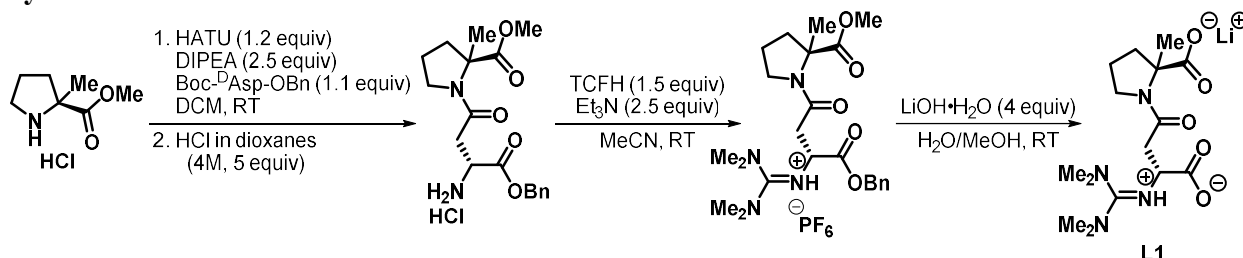

**Peptide Coupling:** To a flask containing  $\alpha$ -Me-Pro-OMe·HCl (1 equiv), was added a solution of Boc-D-Asp-OBn (1.1 equiv), HATU (1.2 equiv), and DIPEA (2.5 equiv) in DCM (0.2 M), dropwise. The reaction was stirred at room temperature overnight. Upon complete conversion (via LCMS), the solution was quenched with 10% (w/v) aqueous citric acid and extracted with DCM (3x). The combined organic layers were washed with brine, dried with Na<sub>2</sub>SO<sub>4</sub>, and concentrated *in vacuo*.

**Deprotection:** The crude peptide dimer was treated with 4 M HCl in 1,4-dioxane (5 equiv). The solution was stirred at room temperature and was monitored with LCMS. Upon complete conversion, the crude mixture was concentrated *in vacuo*.

**Guanidinylation:** To a solution of the crude deprotected dimer (1 equiv) in MeCN (0.5 M) was added TCFH (1.5 equiv) and Et<sub>3</sub>N (2.5 equiv) sequentially. Upon complete conversion (via LCMS) the solution was quenched with 10% (w/v) aqueous citric acid and extracted with DCM (3x). The combined organic layers were washed with brine, dried with Na<sub>2</sub>SO<sub>4</sub>, and concentrated *in vacuo*. The reaction was purified exclusively via reversed-phase chromatography using the indicated mobile phase (KP-C18-HS column).

**Hydrolysis:** To a solution of the guanidinylated dimer (1 equiv) in H<sub>2</sub>O/MeOH (0.5 M), LiOH·H<sub>2</sub>O (4 equiv) was added. The reaction was allowed to stir at room temperature overnight. Upon full conversion, the crude mixture was purified exclusively via reversed-phase chromatography using the indicated mobile phase (KP-C18-HS column). Note: Multiple chromatography runs was required to remove LiPF<sub>6</sub> salt.

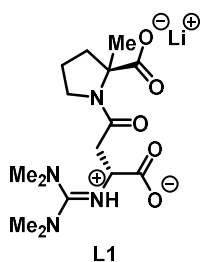

### Lithium (*S*)-1-((*R*)-3-((bis(dimethylamino)methylene)ammonio)-3-carboxylatopropanoyl)-2-methylpyrrolidine-2-carboxylate

Prepared according to synthesis of L1 with an overall yield of 24%. L1 was purified using reversed-phase flash column chromatography using H<sub>2</sub>O/MeOH (0% to 100%) and was obtained as an off-white solid. Note: The ligand elutes at 100% H<sub>2</sub>O, however, it has a propensity to streak during purification.

**<sup>1</sup>H NMR** (400 MHz, CD<sub>3</sub>OD) δ 4.23 (dd, *J* = 11.0, 2.7 Hz, 1H), 3.71 – 3.61 (m, 1H), 3.56 (m, 1H), 3.29 (p, *J* = 1.7 Hz, 2H), 3.00 (s, 6H), 2.91 (m, 6H), 2.79 (m, 1H), 2.22 – 2.11 (m, 2H), 1.97 (m, 2H), 1.84 (m, 1H), 1.52 (s, 3H).

**<sup>13</sup>C NMR** (101 MHz, CD<sub>3</sub>OD) δ 180.0, 176.2, 167.8, 162.6, 68.3, 56.5, 48.2, 39.5, 38.6, 38.5, 37.8, 23.2, 21.3.

**IR** (neat film, cm<sup>-1</sup>) 3389, 2496, 2363, 2337, 2189, 2162, 2020, 1975, 1615, 1396.

**HRMS** (ESI) [M+H]<sup>+</sup> calculated 343.1981 m/z (found 343.1978 m/z for C<sub>15</sub>H<sub>27</sub>N<sub>4</sub>O<sub>5</sub>).

### General procedure for the synthesis of quinazolinones:

#### General procedure 1A (GP1A):

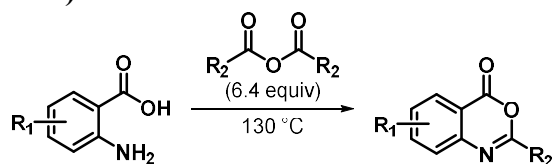

The desired benzoxazin-4-one was prepared following the literature procedure.<sup>1</sup>

The anthranilic acid (1.0 equiv) was added to an oven-dried sealed (thick-walled) flask equipped with a magnetic stir bar. The solid was suspended in anhydride (6.4 equiv), sealed tightly, and submerged into an oil bath at 130 °C. The cloudy suspension quickly became a homogeneous solution, which was allowed to stir at 130 °C overnight. The reaction solution was allowed to cool to room temperature, and the contents of the sealed tube were transferred to a round bottom flask washing with DCM. The benzoxazin-4-one was concentrated *in vacuo* and was used without further purification assuming quantitative yield.

#### General procedure 1B (GP1B):

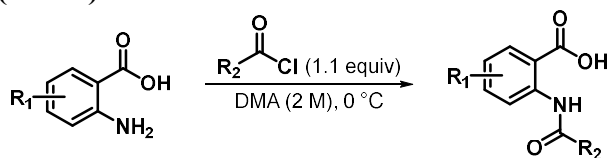

The desired *N*-acyl anthranilic acid was prepared following the literature procedure.<sup>1</sup>

The anthranilic acid (1 equiv) was dissolved in *N,N*-dimethylacetamide (2 M) in a round bottom flask equipped with a magnetic stir bar. The solution was cooled to 0 °C, and the acid chloride (1.1 equiv) was added slowly to the stirring solution at 0 °C. The solution was allowed to stir for 4 h at 0 °C before being poured into ice water. The resulting suspension was filtered, and the collected solid was dried *in vacuo* to yield *N*-acyl anthranilic acid.

#### General procedure 2 (GP2):

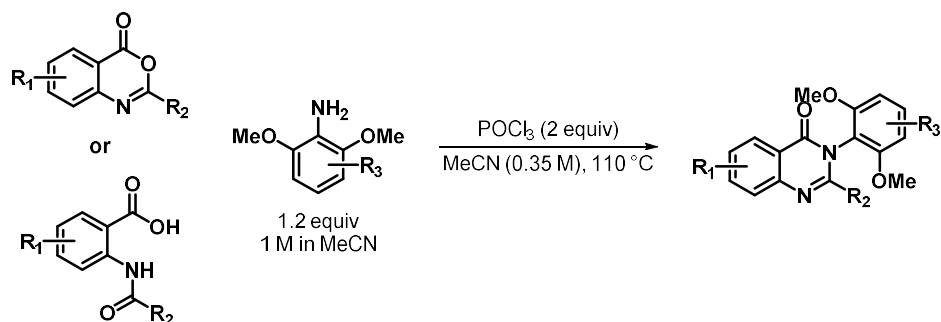

The desired quinazolinone was prepared following a modified literature procedure.<sup>2</sup>

The benzoxazin-4-one (1.0 equiv) or *N*-acyl anthranilic acid (1.0 equiv) was added to an oven dried sealed (thick-walled) flask equipped with a magnetic stir bar. MeCN (0.35 M) and POCl<sub>3</sub> (2 equiv) were added sequentially. The aniline (1.2 equiv, 1 M in MeCN) was added to the flask, sealed tightly and submerged into an oil bath at 110 °C overnight. The reaction was allowed to cool to room temperature. The reaction was quenched with a saturated solution of NaHCO<sub>3</sub> and extracted with CHCl<sub>3</sub>/IPA (3:1) (2x). The combined organic layers were washed with brine, dried with Na<sub>2</sub>SO<sub>4</sub> and concentrated *in vacuo*. The reaction was purified via Si gel flash chromatography using the indicated mobile phase, followed by reversed-phase chromatography using the indicated mobile phase (KP-C18-HS column).

#### General procedure 3 (GP3):

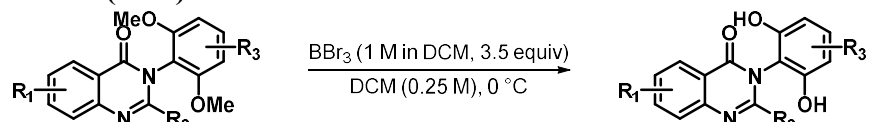

To a flame dried round bottom flask under argon atmosphere, quinazolinone (1 equiv) was added. DCM (0.25 M) was added and the solution was cooled to 0 °C. BBr<sub>3</sub> (1 M in DCM, 3.5 equiv) was added dropwise and the reaction was stirred overnight. The reaction was quenched with cold water at 0 °C and extracted with CHCl<sub>3</sub>/IPA (3:1) (3x). The combined organic layers were washed with brine, dried with Na<sub>2</sub>SO<sub>4</sub>, and concentrated *in vacuo*. The reaction was purified exclusively via reversed-phase chromatography using the indicated mobile phase (KP-C18-HS column).

#### General Procedure 4 (GP4):

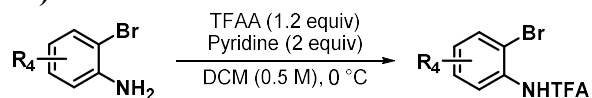

The bromoaniline (1 equiv) was added to a round bottom flask equipped with a magnetic stir bar. DCM (0.5 M) was added and the solution was cooled to 0 °C. Pyridine (2 equiv) and TFAA (1.2 equiv) were added sequentially. The reaction was stirred for 3 hours at room temperature. The reaction was quenched with cold water and extracted with DCM (3x). The combined organic layers were washed with brine, dried with Na<sub>2</sub>SO<sub>4</sub>, and concentrated *in vacuo*. The trifluoroacetamides were purified via Si gel flash column chromatography using the indicated mobile phase.

#### General procedure 5 (GP5):

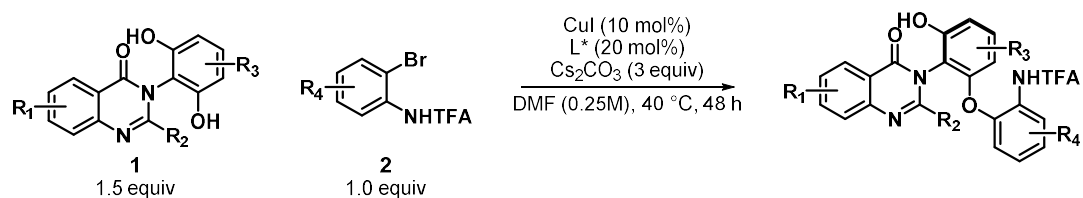

To a flame dried two dram vial under argon atmosphere, quinazolinone **1** (1.5 equiv), trifluoroacetamide **2** (1 equiv), CuI (10 mol%), ligand (20 mol%), and Cs<sub>2</sub>CO<sub>3</sub> (3 equiv) were added. DMF (0.25 M) was added and a Teflon lined screw cap was fitted. The vial was sealed with Teflon tape and placed in a preheated oil bath at the indicated temperature and time. The reaction was quenched with 1 M HCl and extracted with CHCl<sub>3</sub>/IPA (3:1) (3x). The combined organic layers were washed with brine, dried with Na<sub>2</sub>SO<sub>4</sub>, filtered through a plug of silica gel using CHCl<sub>3</sub>/IPA and concentrated *in vacuo*. The pure products were obtained via silica gel flash column chromatography using the indicated mobile phase.

## Quinazolinones:

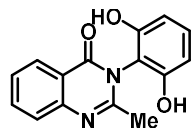

### 3-(2,6-dihydroxyphenyl)-2-methylquinazolin-4(3H)-one (1a)

Prepared according to **GP1A**, **GP2**, and **GP3** with an overall yield of 67%. The quinazolinone was purified by flash column chromatography using hexanes:EtOAc (2:1 v:v) during **GP2** and reversed-phase flash column chromatography using H<sub>2</sub>O/MeOH (0% to 100%) during **GP3** and was obtained as an off-white solid.

**<sup>1</sup>H NMR** (400 MHz, CD<sub>3</sub>OD) δ 8.19 (dd, *J* = 8.0, 1.5 Hz, 1H), 7.81 (ddd, *J* = 8.5, 7.2, 1.5 Hz, 1H), 7.65 (d, *J* = 8.0 Hz, 1H), 7.50 (ddd, *J* = 8.3, 7.2, 1.1 Hz, 1H), 7.14 (t, *J* = 8.3 Hz, 1H), 6.50 (d, *J* = 8.3 Hz, 2H), 2.26 (s, 3H).

**<sup>13</sup>C NMR** (101 MHz, CD<sub>3</sub>OD) δ 161.9, 156.9, 153.9, 147.3, 134.4, 130.3, 126.3, 126.3, 125.6, 120.4, 112.5, 106.8, 21.1.

**IR** (neat film, cm<sup>-1</sup>) 3252, 1663, 1608, 1473, 1431, 1383, 1356, 1262, 1022.

**HRMS** (ESI) [M+H]<sup>+</sup> calculated 269.0921 m/z (found 269.0930 m/z for C<sub>15</sub>H<sub>13</sub>N<sub>2</sub>O<sub>3</sub>).

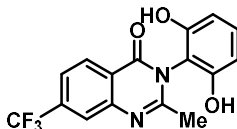

### 3-(2,6-dihydroxyphenyl)-2-methyl-7-(trifluoromethyl)quinazolin-4(3H)-one (1b)

Prepared according to **GP1A**, **GP2**, and **GP3** with an overall yield of 24%. The quinazolinone was purified by flash column chromatography using hexanes:EtOAc (1:1 v:v) during **GP2** and reversed-phase flash column chromatography using H<sub>2</sub>O/MeOH (0% to 100%) during **GP3** and was obtained as an off-white solid.

**<sup>1</sup>H NMR** (600 MHz, CD<sub>3</sub>OD) δ 8.36 (d, *J* = 8.3 Hz, 1H), 7.91 (s, 1H), 7.74 (d, *J* = 8.3 Hz, 1H), 7.15 (t, *J* = 8.3 Hz, 1H), 6.51 (d, *J* = 8.3 Hz, 2H), 2.29 (s, 3H).

**<sup>13</sup>C NMR** (151 MHz, CD<sub>3</sub>OD) δ 161.0, 158.7, 153.8, 147.5, 135.5 (q, *J* = 32.8 Hz), 130.5, 127.9, 123.6 (q, *J* = 272.2 Hz), 123.2 (q, *J* = 4.1 Hz), 123.1, 122.0 (q, *J* = 3.4 Hz), 112.2, 106.9, 21.4.

**<sup>19</sup>F NMR** (376 MHz, CD<sub>3</sub>OD) δ -64.7.

**IR** (neat film, cm<sup>-1</sup>) 3253, 1674, 1607, 1475, 1441, 1384, 1321, 1277, 1172, 1131, 1069, 1022.

**HRMS** (ESI) [M+H]<sup>+</sup> calculated 337.0795 m/z (found 337.0802 m/z for C<sub>16</sub>H<sub>11</sub>F<sub>3</sub>N<sub>2</sub>O<sub>3</sub>).

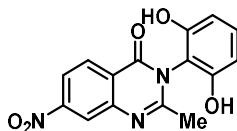

**3-(2,6-dihydroxyphenyl)-2-methyl-7-nitroquinazolin-4(3H)-one (1c)**

Prepared according to **GP1A**, **GP2**, and **GP3** with an overall yield of 29%. The quinazolinone was purified by flash column chromatography using hexanes:EtOAc (1:1 v:v) during **GP2** and reversed-phase flash column chromatography using H<sub>2</sub>O/MeOH (0% to 100%) during **GP3** and was obtained as an off-white solid.

<sup>1</sup>H NMR (400 MHz, CD<sub>3</sub>OD) δ 8.43 (d, *J* = 2.2 Hz, 1H), 8.38 (d, *J* = 8.8 Hz, 1H), 8.25 (dd, *J* = 8.8, 2.2 Hz, 1H), 7.15 (t, *J* = 8.3 Hz, 1H), 6.50 (d, *J* = 8.3 Hz, 2H), 2.30 (s, 3H).

<sup>13</sup>C NMR (151 MHz, CD<sub>3</sub>OD) δ 160.6, 159.3, 153.7, 151.8, 148.0, 130.6, 128.5, 124.6, 121.2, 119.7, 112.1, 106.9, 21.4.

IR (neat film, cm<sup>-1</sup>) 3420, 3262, 1678, 1607, 1534, 1475, 1349, 1030.

HRMS (ESI) [M+H]<sup>+</sup> calculated 314.0771 m/z (found 314.0783 m/z for C<sub>15</sub>H<sub>11</sub>N<sub>3</sub>O<sub>5</sub>).

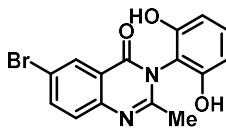

**6-bromo-3-(2,6-dihydroxyphenyl)-2-methylquinazolin-4(3H)-one (1d)**

Prepared according to **GP1A**, **GP2**, and **GP3** with an overall yield of 19%. The quinazolinone was purified by flash column chromatography using hexanes:DCM:acetone (10:10:1 v:v:v) during **GP2** and sequentially reversed-phase flash column chromatography using H<sub>2</sub>O/MeOH (0% to 100%) and triturated with MeOH during **GP3** and was obtained as a light brown solid.

<sup>1</sup>H NMR (400 MHz, DMSO-*d*<sub>6</sub>) δ 9.84 (s, 2H), 8.13 (d, *J* = 2.4 Hz, 1H), 7.94 (dd, *J* = 8.6, 2.4 Hz, 1H), 7.57 (d, *J* = 8.6 Hz, 1H), 7.07 (t, *J* = 8.2 Hz, 1H), 6.45 (d, *J* = 8.2 Hz, 2H), 2.11 (s, 3H).

<sup>13</sup>C NMR (101 MHz, DMSO-*d*<sub>6</sub>) δ 159.9, 157.0, 154.3, 146.9, 137.7, 130.6, 129.5, 128.7, 122.7, 118.9, 112.9, 107.4, 22.9.

IR (neat film, cm<sup>-1</sup>) 3270, 1669, 1610, 1471, 1379, 1355, 1281, 1031.

HRMS (ESI) [M+H]<sup>+</sup> calculated 347.0026 m/z (found 347.0031 m/z for C<sub>15</sub>H<sub>12</sub>BrN<sub>2</sub>O<sub>3</sub>).

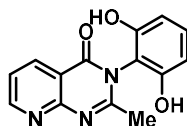

**3-(2,6-dihydroxyphenyl)-2-methylpyrido[2,3-*d*]pyrimidin-4(3H)-one (1e)**



Prepared according to **GP1A**, **GP2**, and **GP3** with an overall yield of 39%. The quinazolinone was purified by sequential flash column chromatography using reversed-phase [H<sub>2</sub>O/MeOH (0% to 100%)] and DCM:acetone (4:1 v:v) during **GP2** and reversed-phase flash column chromatography using H<sub>2</sub>O/MeOH during **GP3** and was obtained as a light green solid.

<sup>1</sup>H NMR (400 MHz, CD<sub>3</sub>OD) δ 9.01 – 8.84 (m, 1H), 8.69 – 8.52 (m, 1H), 7.62 – 7.48 (m, 1H), 7.15 (t, *J* = 8.3 Hz, 1H), 6.50 (d, *J* = 8.3 Hz, 2H), 2.31 (s, 3H).

<sup>13</sup>C NMR (151 MHz, CD<sub>3</sub>OD) δ 161.9, 160.8, 157.3, 155.5, 153.8, 136.6, 130.6, 122.1, 115.8, 112.0, 106.8, 21.5.

IR (neat film, cm<sup>-1</sup>) 3250, 1674, 1594, 1474, 1441, 1382, 1352, 1288, 1258, 1031.

HRMS (ESI) [M+H]<sup>+</sup> calculated 270.0873 m/z (found 270.0882 m/z for C<sub>14</sub>H<sub>11</sub>N<sub>3</sub>O<sub>3</sub>).

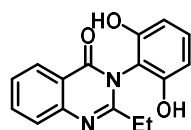

**3-(2,6-dihydroxyphenyl)-2-ethylquinazolin-4(3H)-one (1f)**

Prepared according to **GP1A**, **GP2**, and **GP3** with an overall yield of 59%. The quinazolinone was filtered through a Si gel plug with EtOAc during **GP2** and reversed-phase flash column chromatography using H<sub>2</sub>O/MeOH (0% to 100%) during **GP3** and was obtained as an off-white solid.

<sup>1</sup>H NMR (400 MHz, CD<sub>3</sub>OD) δ 8.18 (dd, *J* = 8.0, 1.5 Hz, 1H), 7.81 (ddd, *J* = 8.5, 7.1, 1.5 Hz, 1H), 7.69 (d, *J* = 8.0 Hz, 1H), 7.48 (ddd, *J* = 8.2, 7.1, 1.2 Hz, 1H), 7.13 (t, *J* = 8.2 Hz, 1H), 6.49 (d, *J* = 8.2 Hz, 2H), 2.52 (q, *J* = 7.5 Hz, 2H), 1.19 (t, *J* = 7.5 Hz, 3H).

<sup>13</sup>C NMR (101 MHz, CD<sub>3</sub>OD) δ 162.2, 160.3, 154.0, 147.6, 134.3, 130.2, 126.2, 126.1, 126.0, 120.4, 112.2, 106.8, 27.9, 10.0.

IR (neat film, cm<sup>-1</sup>) 3252, 2962, 1663, 1611, 1473, 1377, 1026, 776.

HRMS (ESI) [M+H]<sup>+</sup> calculated 283.1077 m/z (found 283.1089 m/z for C<sub>16</sub>H<sub>14</sub>N<sub>2</sub>O<sub>3</sub>).

## Arylated Quinazolinones:

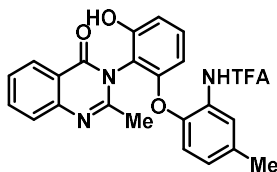

### 2,2,2-trifluoro-*N*-(2-(3-hydroxy-2-(2-methyl-4-oxoquinazolin-3(4*H*)-yl)phenoxy)-5-methylphenyl)acetamide (3a)

Prepared according to **GP5** using *N*-(2-bromo-5-methylphenyl)-2,2,2-trifluoroacetamide (56.4 mg, 0.2 mmol) and 3-(2,6-dihydroxyphenyl)-2-methylquinazolin-4(3*H*)-one (80.4 mg, 0.3 mmol) at 40 °C for 48 hours. The arylated quinazolinone was purified by flash column chromatography using hexanes:DCM:acetone (3:1:1 v:v:v) and was obtained as a white solid (55 mg, 0.12 mmol, 59%).

**Scale up:** To a flame dried 50 mL pressure flask under argon atmosphere, *N*-(2-bromo-5-methylphenyl)-2,2,2-trifluoroacetamide (564 mg, 2 mmol) and 3-(2,6-dihydroxyphenyl)-2-methylquinazolin-4(3*H*)-one (804 mg, 3 mmol), CuI (38 mg, 0.2 mmol), ligand (140 mg, 0.3 mmol), and Cs<sub>2</sub>CO<sub>3</sub> (1.95 g, 6.0 mmol) were added. DMF (8 mL) was added and a Teflon lined screw cap was fitted. The vial was sealed with Teflon tape and placed in a preheated oil bath at 40 °C for 72 hours. The reaction was quenched with 1 M HCl and extracted with CHCl<sub>3</sub>/IPA (3:1) (3x). The combined organic layers were washed with brine, dried with Na<sub>2</sub>SO<sub>4</sub>, filtered through a plug of silica gel using CHCl<sub>3</sub>/IPA and concentrated *in vacuo*. The arylated quinazolinone was purified by flash column chromatography using hexanes:DCM:acetone (3:1:1 v:v:v) and was obtained as a white solid (516 mg, 1.1 mmol, 55%).

**<sup>1</sup>H NMR** (600 MHz, CD<sub>3</sub>OD) δ 8.17 (d, *J* = 8.0 Hz, 1H), 7.80 (t, *J* = 7.7 Hz, 1H), 7.64 (d, *J* = 8.0 Hz, 1H), 7.48 (t, *J* = 7.6 Hz, 1H), 7.46 (s, 1H), 7.23 (t, *J* = 8.4 Hz, 1H), 7.07 (d, *J* = 8.4 Hz, 1H), 7.03 (d, *J* = 8.4 Hz, 1H), 6.76 (d, *J* = 8.4 Hz, 1H), 6.34 (d, *J* = 8.4 Hz, 1H), 2.34 (s, 3H), 2.29 (s, 3H).

**<sup>13</sup>C NMR** (151 MHz, CD<sub>3</sub>OD) δ 161.8, 156.2, 155.8 (q, *J* = 37.8 Hz), 154.3, 153.7, 147.2, 145.6, 135.0, 134.7, 130.5, 128.3, 126.5, 126.4, 125.9, 125.8, 120.4, 120.1, 115.9 (q, *J* = 287.5 Hz), 114.8, 110.7, 106.9, 21.2, 19.4.

**<sup>19</sup>F NMR** (376 MHz, CD<sub>3</sub>OD) δ -76.8.

**IR** (neat film, cm<sup>-1</sup>) 3253, 2947, 2834, 1728, 1672, 1607, 1469, 1267, 1210, 1162, 1018.

$[\alpha]_{589}^{20} +38.24$  (c = 0.5, MeOH).

**HRMS** (ESI) [M+H]<sup>+</sup> calculated 470.1322 m/z (found 470.1329 m/z for C<sub>24</sub>H<sub>19</sub>F<sub>3</sub>N<sub>3</sub>O<sub>4</sub>).

**HPLC** (AD-H, ethanol/*n*-hexane = 8/92, flow rate = 1.0 mL/min, l = 254 nm) tR = 7.1 min (major), 8.0 min (minor)

**Racemic**

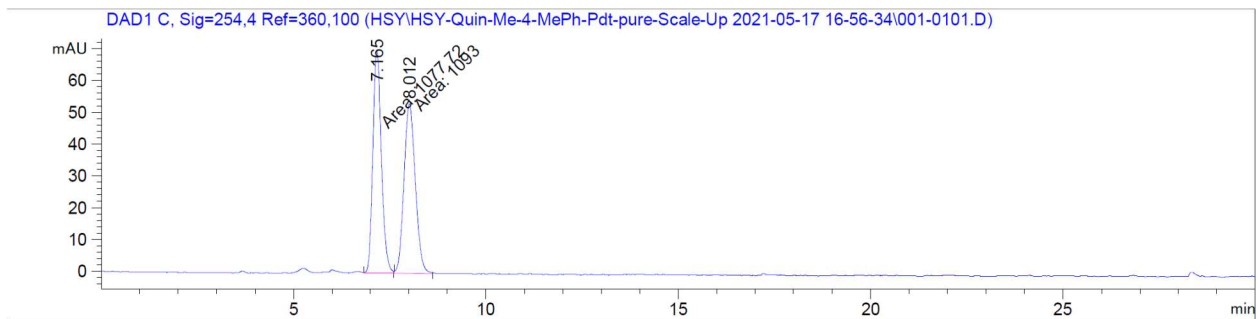

Signal 3: DAD1 C, Sig=254,4 Ref=360,100

| Peak # | RetTime [min] | Type | Width [min] | Area [mAU*s] | Height [mAU] | Area %  |
|--------|---------------|------|-------------|--------------|--------------|---------|
| 1      | 7.165         | MM   | 0.2560      | 1077.71680   | 70.17303     | 49.6479 |
| 2      | 8.012         | MM   | 0.3414      | 1093.00159   | 53.35354     | 50.3521 |

Totals : 2170.71838 123.52658

### Enantioenriched

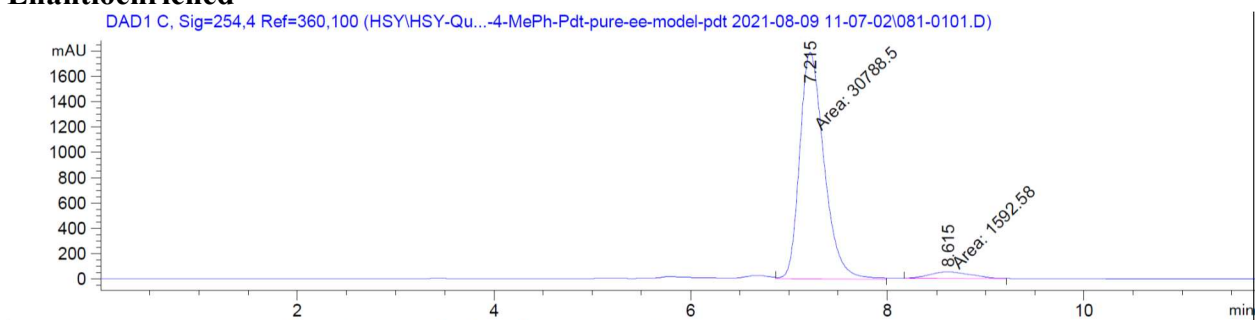

Signal 3: DAD1 C, Sig=254,4 Ref=360,100

| Peak # | RetTime [min] | Type | Width [min] | Area [mAU*s] | Height [mAU] | Area %  |
|--------|---------------|------|-------------|--------------|--------------|---------|
| 1      | 7.215         | MM   | 0.2861      | 3.07885e4    | 1793.27087   | 95.0818 |
| 2      | 8.615         | MM   | 0.4976      | 1592.58264   | 53.34053     | 4.9182  |

### Enantioenriched Scale up

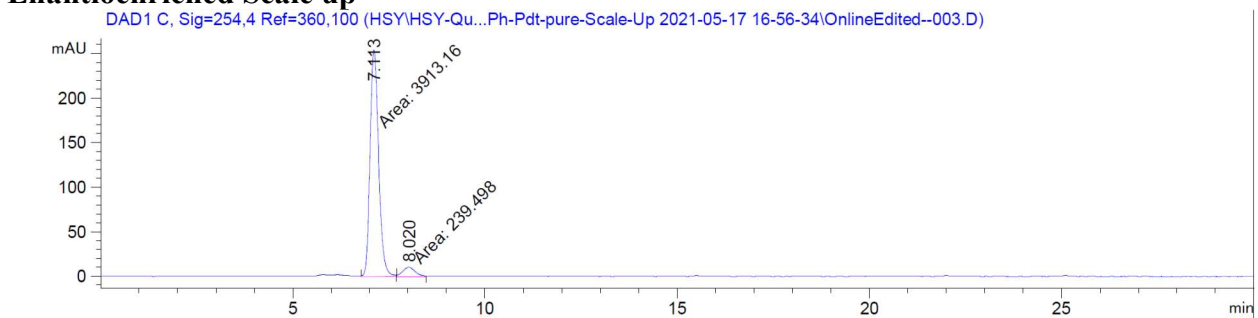

Signal 3: DAD1 C, Sig=254,4 Ref=360,100

| Peak #   | RetTime [min] | Type | Width [min] | Area [mAU*s] | Height [mAU] | Area %  |
|----------|---------------|------|-------------|--------------|--------------|---------|
| 1        | 7.113         | MM   | 0.2563      | 3913.15698   | 254.44354    | 94.2326 |
| 2        | 8.020         | MM   | 0.3771      | 239.49825    | 10.58506     | 5.7674  |
| Totals : |               |      |             | 4152.65523   | 265.02860    |         |

**2,2,2-trifluoro-N-(2-(3-hydroxy-2-(2-methyl-4-oxoquinazolin-3(4H)-yl)phenoxy)phenyl)acetamide (3b)**

Prepared according to **GP5** using *N*-(2-bromophenyl)-2,2,2-trifluoroacetamide (53.6 mg, 0.2 mmol) and 3-(2,6-dihydroxyphenyl)-2-methylquinazolin-4(3*H*)-one (80.4 mg, 0.3 mmol) at 40 °C for 48 hours. The arylated quinazolinone was purified by flash column chromatography using hexanes:DCM:acetone (3:0.5:1 v:v:v) and was obtained as a white solid (49 mg, 0.11 mmol, 54%).

**<sup>1</sup>H NMR** (600 MHz, CD<sub>3</sub>OD) δ 8.16 (dd, *J* = 8.0, 1.1 Hz, 1H), 7.78 (ddd, *J* = 8.5, 7.2, 1.5 Hz, 1H), 7.67 – 7.57 (m, 2H), 7.50 – 7.41 (m, 1H), 7.31 – 7.21 (m, 2H), 7.21 – 7.09 (m, 2H), 6.79 (dd, *J* = 8.4, 1.1 Hz, 1H), 6.39 (dd, *J* = 8.4, 1.1 Hz, 1H), 2.35 (s, 3H).

**<sup>13</sup>C NMR** (151 MHz, CD<sub>3</sub>OD) δ 161.8, 156.2, 155.8 (q, *J* = 37.7, 37.2 Hz), 154.4, 153.5, 148.1, 147.2, 134.7, 130.6, 127.8, 126.7, 126.5, 126.4, 125.8, 125.7, 124.6, 120.4, 120.0, 115.9 (q, *J* = 287.5 Hz), 115.0, 111.0, 107.4, 21.2.

**<sup>19</sup>F NMR** (376 MHz, CD<sub>3</sub>OD) δ -76.7.

**IR** (neat, cm<sup>-1</sup>) 3250, 2946, 1728, 1671, 1605. 1470, 1459, 1259, 1209, 1152, 1105, 1018, 769.

**HRMS** (ESI) [M+H]<sup>+</sup> calculated 456.1166 m/z (found 456.1170 m/z for C<sub>23</sub>H<sub>17</sub>F<sub>3</sub>N<sub>3</sub>O<sub>4</sub>).

**HPLC** (IA, ethanol/*n*-hexane = 5/95, flow rate = 1.0 mL/min, l = 254 nm) tR = 10.9 min (minor), 11.9 min (major)

**Racemic**

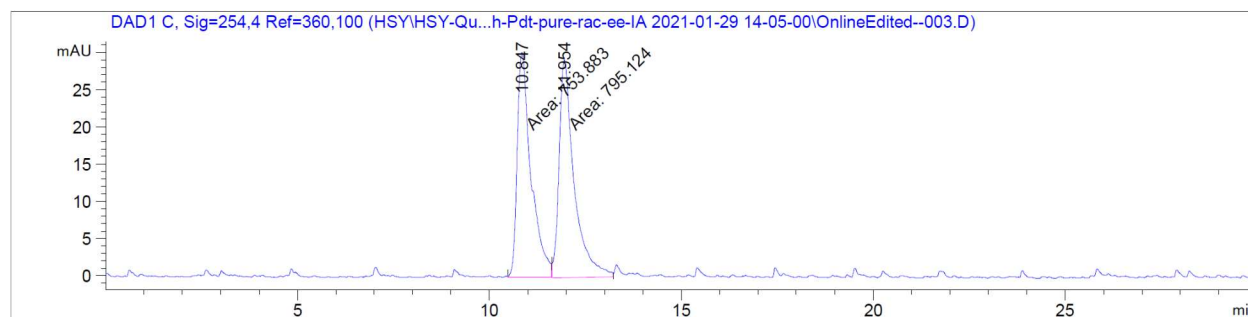

Signal 3: DAD1 C, Sig=254,4 Ref=360,100

| Peak # | RetTime [min] | Type | Width [min] | Area [mAU*s] | Height [mAU] | Area %  |
|--------|---------------|------|-------------|--------------|--------------|---------|
| 1      | 10.847        | MM   | 0.4159      | 753.88342    | 30.21387     | 48.6688 |
| 2      | 11.954        | MM   | 0.4530      | 795.12408    | 29.25619     | 51.3312 |

Totals : 1549.00751 59.47005

### Enantioenriched

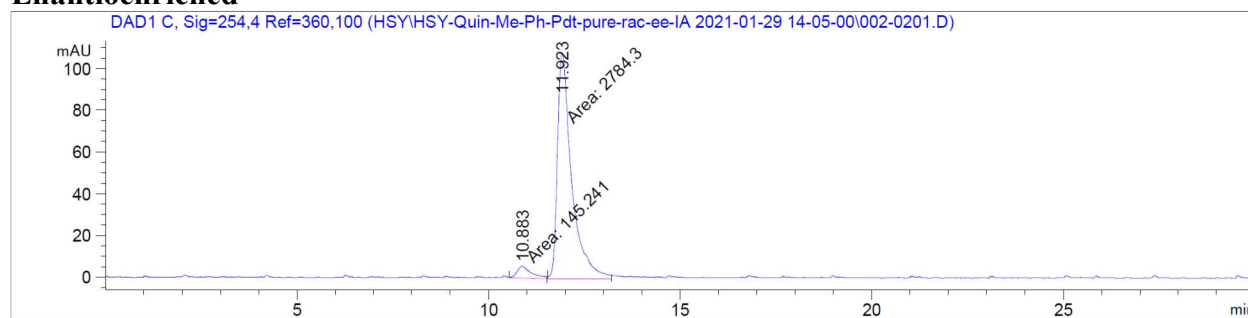

Signal 3: DAD1 C, Sig=254,4 Ref=360,100

| Peak # | RetTime [min] | Type | Width [min] | Area [mAU*s] | Height [mAU] | Area %  |
|--------|---------------|------|-------------|--------------|--------------|---------|
| 1      | 10.883        | MM   | 0.4381      | 145.24062    | 5.52484      | 4.9578  |
| 2      | 11.923        | MM   | 0.4283      | 2784.29736   | 108.34653    | 95.0422 |

Totals : 2929.53798 113.87138

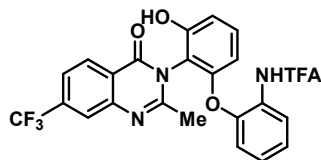

### 2,2,2-trifluoro-N-(2-(3-hydroxy-2-(2-methyl-4-oxo-7-(trifluoromethyl)quinazolin-3(4H)-yl)phenoxy)phenyl)acetamide (3c)

Prepared according to **GP5** using *N*-(2-bromophenyl)-2,2,2-trifluoroacetamide (53.6 mg, 0.2 mmol) and 3-(2,6-dihydroxyphenyl)-2-methyl-7-(trifluoromethyl)quinazolin-4(3*H*)-one (100.9 mg, 0.3 mmol) at 40 °C for 48 hours. The arylated quinazolinone was purified by flash

column chromatography using hexanes:DCM:acetone (3:1:1 v:v:v) and was obtained as a white solid (65 mg, 0.124 mmol, 62%).

**<sup>1</sup>H NMR** (600 MHz, CD<sub>3</sub>OD) δ 8.32 (d, *J* = 8.2 Hz, 1H), 7.90 (s, 1H), 7.70 (d, *J* = 8.2 Hz, 1H), 7.59 (dd, *J* = 8.0, 1.4 Hz, 1H), 7.36 – 7.22 (m, 2H), 7.20 – 7.10 (m, 2H), 6.81 (dd, *J* = 8.4, 1.0 Hz, 1H), 6.41 (dd, *J* = 8.4, 0.9 Hz, 1H), 2.37 (s, 3H).

**<sup>13</sup>C NMR** (151 MHz, CD<sub>3</sub>OD) δ 160.9, 157.8, 155.8 (q, *J* = 37.7 Hz), 154.3, 153.3, 148.2, 147.4, 135.7 (q, *J* = 32.6 Hz), 130.8, 128.0, 127.9, 126.6, 125.8, 124.6, 123.5 (q, *J* = 272.2 Hz), 123.3 (q, *J* = 4.1 Hz), 122.7, 122.2 (q, *J* = 3.4 Hz), 120.2, 115.9 (q, *J* = 287.5 Hz), 114.8, 111.1, 107.5, 21.5.

**<sup>19</sup>F NMR** (376 MHz, CD<sub>3</sub>OD) δ -64.7, -76.7.

**IR** (neat film, cm<sup>-1</sup>) 3254, 1730, 1682, 1606, 1546, 1471, 1321, 1262, 1213, 1162, 1067, 1018.

**HRMS** (ESI) [M+H]<sup>+</sup> calculated 524.1040 m/z (found 524.1047 m/z for C<sub>24</sub>H<sub>16</sub>F<sub>6</sub>N<sub>3</sub>O<sub>4</sub>).

**HPLC** (IA, ethanol/*n*-hexane = 8/92, flow rate = 1.0 mL/min, λ = 254 nm) t<sub>R</sub> = 6.7 min (minor), 87.2 min (major)

### Racemic

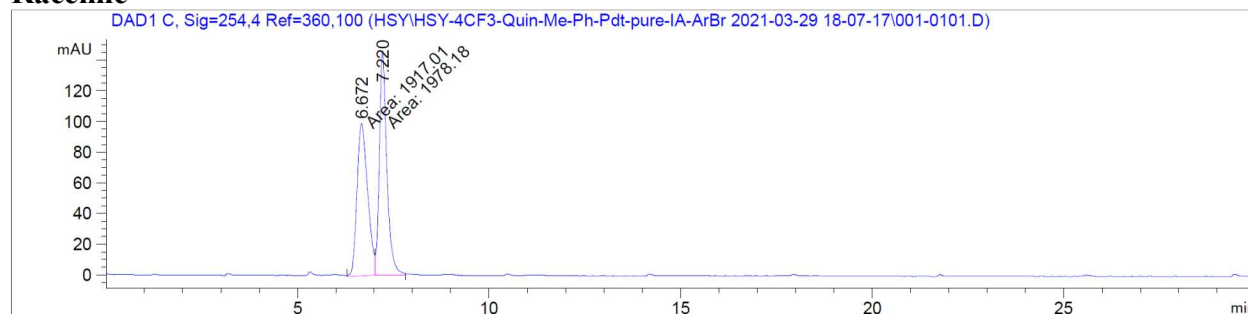

Signal 3: DAD1 C, Sig=254,4 Ref=360,100

| Peak # | RetTime [min] | Type | Width [min] | Area [mAU*s] | Height [mAU] | Area %  |
|--------|---------------|------|-------------|--------------|--------------|---------|
| 1      | 6.672         | MM   | 0.3224      | 1917.01477   | 99.11428     | 49.2148 |
| 2      | 7.220         | MM   | 0.2257      | 1978.18445   | 146.07533    | 50.7852 |

Totals : 3895.19922 245.18961

### Enantioenriched

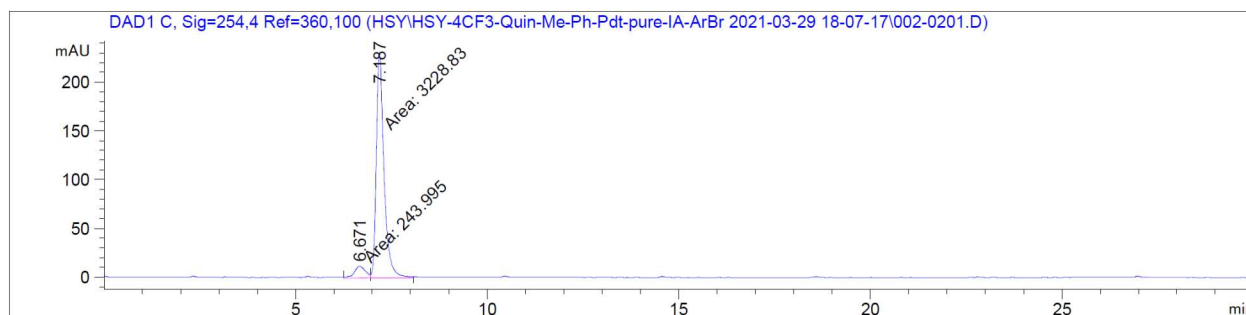

Signal 3: DAD1 C, Sig=254,4 Ref=360,100

| Peak # | RetTime [min] | Type | Width [min] | Area [mAU*s] | Height [mAU] | Area %  |
|--------|---------------|------|-------------|--------------|--------------|---------|
| 1      | 6.671         | MM   | 0.3363      | 243.99524    | 12.09381     | 7.0258  |
| 2      | 7.187         | MM   | 0.2328      | 3228.83496   | 231.14221    | 92.9742 |

Totals : 3472.83020 243.23602

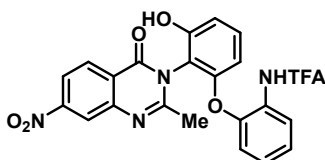

**2,2,2-trifluoro-*N*-(2-(3-hydroxy-2-(2-methyl-7-nitro-4-oxoquinazolin-3(4*H*)-yl)phenoxy)phenyl)acetamide (3d)**

Prepared according to **GP5** using *N*-(2-bromophenyl)-2,2,2-trifluoroacetamide (53.6 mg, 0.2 mmol) and 3-(2,6-dihydroxyphenyl)-2-methyl-7-nitroquinazolin-4(3*H*)-one (94.0 mg, 0.3 mmol) at 40 °C for 48 hours. The arylated quinazolinone was purified by flash column chromatography using hexanes:DCM:acetone (1:4:0.1 v:v:v) and was obtained as an off-white solid (51 mg, 0.102 mmol, 51%).

**<sup>1</sup>H NMR** (600 MHz, CD<sub>3</sub>OD) δ 8.40 (d, *J* = 2.2 Hz, 1H), 8.33 (d, *J* = 8.7 Hz, 1H), 8.20 (dd, *J* = 8.7, 2.2 Hz, 1H), 7.58 (dd, *J* = 8.0, 1.6 Hz, 1H), 7.32 – 7.23 (m, 2H), 7.17 (td, *J* = 7.8, 1.4 Hz, 1H), 7.14 (dd, *J* = 8.2, 1.4 Hz, 1H), 6.81 (dd, *J* = 8.4, 1.2 Hz, 1H), 6.42 (dd, *J* = 8.4, 1.1 Hz, 1H), 2.38 (s, 3H).

**<sup>13</sup>C NMR** (151 MHz, CD<sub>3</sub>OD) δ 160.5, 158.4, 155.8 (q, *J* = 37.7 Hz), 154.3, 153.2, 151.8, 148.2, 147.9, 130.9, 128.5, 127.9, 126.5, 125.8, 124.6, 124.3, 121.4, 120.1, 119.9, 115.9 (q, *J* = 287.5 Hz), 114.7, 111.1, 107.6, 21.5.

**<sup>19</sup>F NMR** (376 MHz, CD<sub>3</sub>OD) δ -76.8.

**IR** (neat film, cm<sup>-1</sup>) 3265, 2949, 1728, 1682, 1605, 1534, 1471, 1344, 1261, 1017.

**HRMS** (ESI) [M+H]<sup>+</sup> calculated 501.1016 m/z (found 501.1035 m/z for C<sub>23</sub>H<sub>16</sub>F<sub>3</sub>N<sub>4</sub>O<sub>6</sub>).

HPLC (IA, ethanol/*n*-hexane = 8/92, flow rate = 1.0 mL/min,  $\lambda$  = 254 nm) tR = 12.3 min (minor), 13.5 min (major)

### Racemic

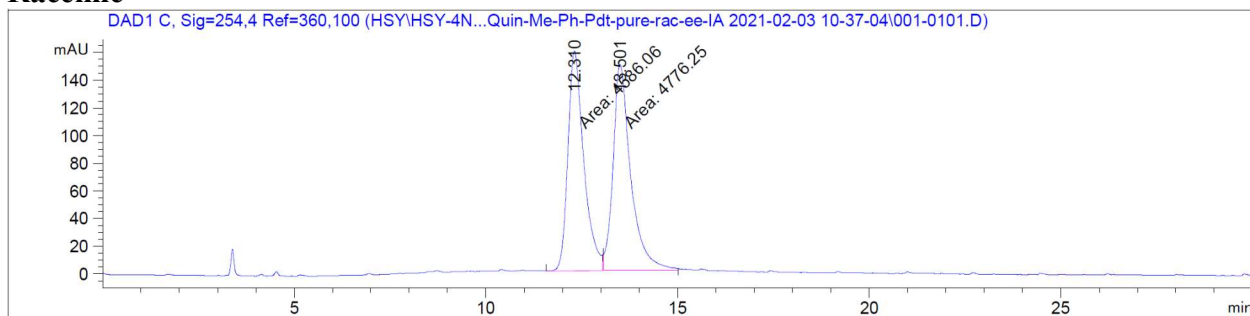

Signal 3: DAD1 C, Sig=254,4 Ref=360,100

| Peak # | RetTime [min] | Type | Width [min] | Area [mAU*s] | Height [mAU] | Area %  |
|--------|---------------|------|-------------|--------------|--------------|---------|
| 1      | 12.310        | MM   | 0.4808      | 4586.06006   | 158.97169    | 48.9843 |
| 2      | 13.501        | MM   | 0.5351      | 4776.24609   | 148.75368    | 51.0157 |

Totals : 9362.30615 307.72537

### Enantioenriched

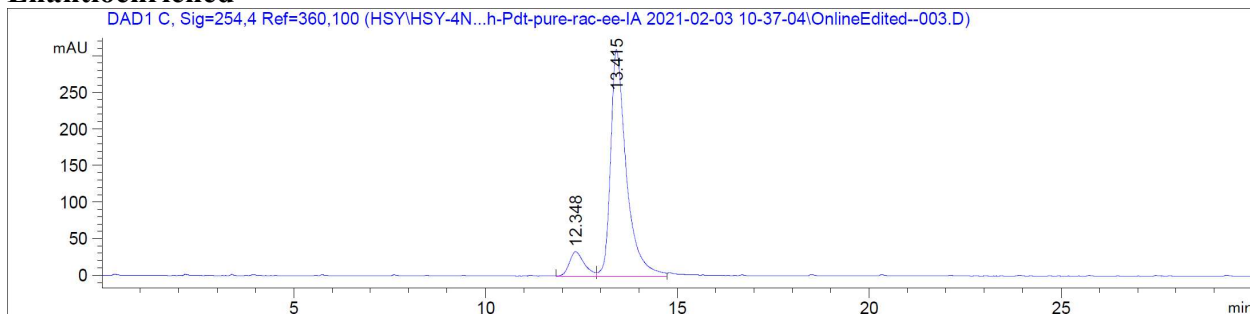

Signal 3: DAD1 C, Sig=254,4 Ref=360,100

| Peak # | RetTime [min] | Type | Width [min] | Area [mAU*s] | Height [mAU] | Area %  |
|--------|---------------|------|-------------|--------------|--------------|---------|
| 1      | 12.348        | VV   | 0.4101      | 907.07922    | 33.47605     | 9.3014  |
| 2      | 13.415        | VV   | 0.4188      | 8845.02344   | 310.10425    | 90.6986 |

Totals : 9752.10266 343.58030

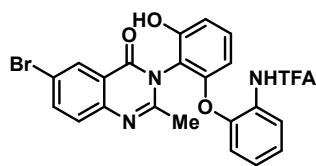



***N*-(2-(2-(6-bromo-2-methyl-4-oxoquinazolin-3(4*H*)-yl)-3-hydroxyphenoxy)phenyl)-2,2,2-trifluoroacetamide (3e)**

Prepared according to **GP5** using *N*-(2-bromophenyl)-2,2,2-trifluoroacetamide (53.6 mg, 0.2 mmol) and 6-bromo-3-(2,6-dihydroxyphenyl)-2-methylquinazolin-4(3*H*)-one (104.2 mg, 0.3 mmol) at 40 °C for 48 hours. The arylated quinazolinone was purified by flash column chromatography using hexanes:DCM:acetone (3:1:1 v:v:v) and was obtained as a white solid (63 mg, 0.118 mmol, 59%).

**<sup>1</sup>H NMR** (600 MHz, CD<sub>3</sub>OD) δ 8.23 (d, *J* = 2.3 Hz, 1H), 7.86 (dd, *J* = 8.7, 2.3 Hz, 1H), 7.61 (dd, *J* = 8.1, 1.6 Hz, 1H), 7.52 (d, *J* = 8.7 Hz, 1H), 7.29 – 7.22 (m, 2H), 7.17 (td, *J* = 7.7, 1.4 Hz, 1H), 7.13 (dd, *J* = 8.1, 1.4 Hz, 1H), 6.79 (dd, *J* = 8.4, 1.1 Hz, 1H), 6.40 (dd, *J* = 8.5, 1.1 Hz, 1H), 2.33 (s, 3H).

**<sup>13</sup>C NMR** (151 MHz, CD<sub>3</sub>OD) δ 160.6, 156.7, 155.8 (q, *J* = 37.8 Hz), 154.3, 153.3, 148.1, 146.2, 137.6, 130.7, 128.7, 128.1, 127.8, 126.6, 125.7, 124.6, 121.6, 120.2, 119.5, 115.9 (q, *J* = 287.5 Hz), 114.9, 111.1, 107.5, 21.4.

**<sup>19</sup>F NMR** (376 MHz, CD<sub>3</sub>OD) δ -76.7.

**IR** (neat film, cm<sup>-1</sup>) 3255, 2946, 2833, 1728, 1675, 1604, 1470, 1261, 1156, 1018.

**HRMS** (ESI) [M+H]<sup>+</sup> calculated 536.0250 m/z (found 536.0261 m/z for C<sub>23</sub>H<sub>16</sub>BrF<sub>3</sub>N<sub>3</sub>O<sub>4</sub>).

**HPLC** (IA, ethanol/*n*-hexane = 8/92, flow rate = 1.0 mL/min, λ = 254 nm) tR = 7.9 min (minor), 9.5 min (major)

**Racemic**

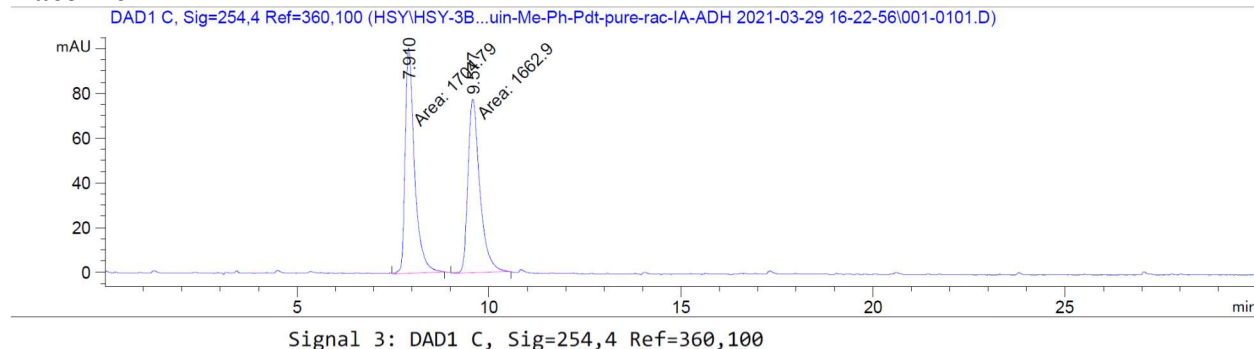

Signal 3: DAD1 C, Sig=254,4 Ref=360,100

| Peak # | RetTime [min] | Type | Width [min] | Area [mAU*s] | Height [mAU] | Area %  |
|--------|---------------|------|-------------|--------------|--------------|---------|
| 1      | 7.910         | MM   | 0.2822      | 1704.79333   | 100.69882    | 50.6220 |
| 2      | 9.577         | MM   | 0.3571      | 1662.90210   | 77.60058     | 49.3780 |

Totals : 3367.69543 178.29940

**Enantioenriched**

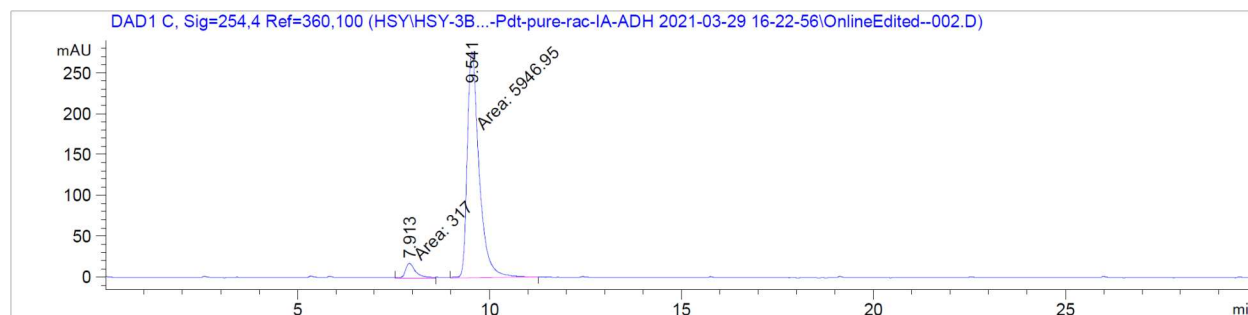

Signal 3: DAD1 C, Sig=254,4 Ref=360,100

| Peak # | RetTime [min] | Type | Width [min] | Area [mAU*s] | Height [mAU] | Area %  |
|--------|---------------|------|-------------|--------------|--------------|---------|
| 1      | 7.913         | MM   | 0.2963      | 316.99979    | 17.83138     | 5.0607  |
| 2      | 9.541         | MM   | 0.3583      | 5946.95166   | 276.62503    | 94.9393 |

Totals : 6263.95145 294.45641

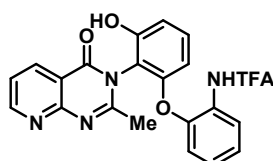

**2,2,2-trifluoro-*N*-(2-(3-hydroxy-2-(2-methyl-4-oxopyrido[2,3-*d*]pyrimidin-3(4*H*)-yl)phenoxy)phenyl)acetamide (3f)**

Prepared according to **GP5** using *N*-(2-bromophenyl)-2,2,2-trifluoroacetamide (53.6 mg, 0.2 mmol) and 3-(2,6-dihydroxyphenyl)-2-methylpyrido[2,3-*d*]pyrimidin-4(3*H*)-one (80.8 mg, 0.3 mmol) at 40 °C for 48 hours. The arylated quinazolinone was purified by flash column chromatography using DCM:MeOH (95:5 v:v) and was obtained as a white solid (48 mg, 0.11 mmol, 53%).

**<sup>1</sup>H NMR** (400 MHz, CD<sub>2</sub>Cl<sub>2</sub>) δ 11.06 (s, 1H), 9.26 (s, 1H), 8.63 (s, 1H), 8.35 – 7.96 (m, 2H), 7.46 – 7.08 (m, 5H), 7.00 (s, 1H), 6.29 (d, *J* = 7.8 Hz, 1H), 2.61 (s, 3H).

**<sup>13</sup>C NMR** (101 MHz, CD<sub>2</sub>Cl<sub>2</sub>) δ 161.7, 160.6, 156.6, 155.2 (q, *J* = 38.3 Hz), 154.6, 153.1, 144.2, 137.7, 131.2, 128.0, 126.7, 125.7, 123.5, 123.4, 121.9, 121.6, 115.6 (q, *J* = 288.3 Hz), 115.3, 113.8, 113.5, 105.7, 23.2.

**<sup>19</sup>F NMR** (471 MHz, CD<sub>2</sub>Cl<sub>2</sub>) δ -76.8.

**IR** (neat film, cm<sup>-1</sup>) 3248, 3070, 1730, 1681, 1595, 1440, 1259, 1208, 1019.

**HRMS** (ESI) [M+H]<sup>+</sup> calculated 457.1118 m/z (found 457.1130 m/z for C<sub>22</sub>H<sub>16</sub>F<sub>3</sub>N<sub>4</sub>O<sub>4</sub>).

**HPLC** (IA, ethanol/*n*-hexane = 8/92, flow rate = 1.0 mL/min, λ = 254 nm) tR = 12.9 min (major), 15.9 min (minor)

## Racemic

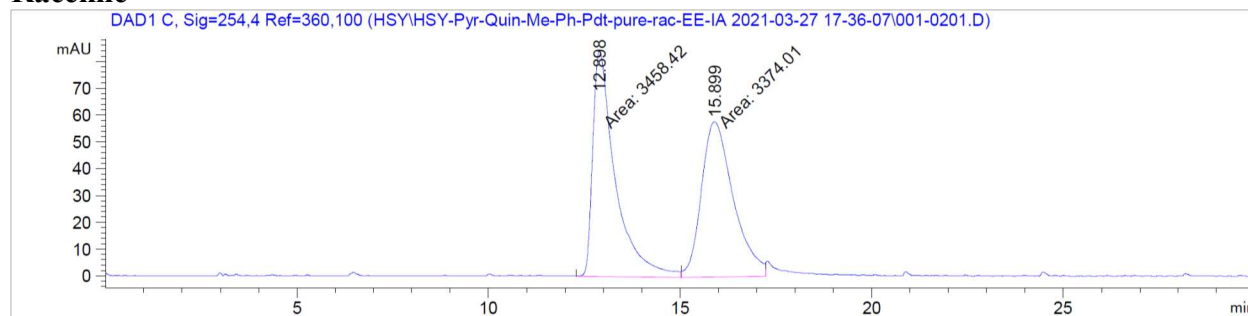

| Peak # | RetTime [min] | Type | Width [min] | Area [mAU*s] | Height [mAU] | Area %  |
|--------|---------------|------|-------------|--------------|--------------|---------|
| 1      | 12.898        | MM   | 0.6831      | 3458.41577   | 84.38475     | 50.6177 |
| 2      | 15.899        | MM   | 0.9703      | 3374.00806   | 57.95691     | 49.3823 |

Totals : 6832.42383 142.34166

## Enantioenriched

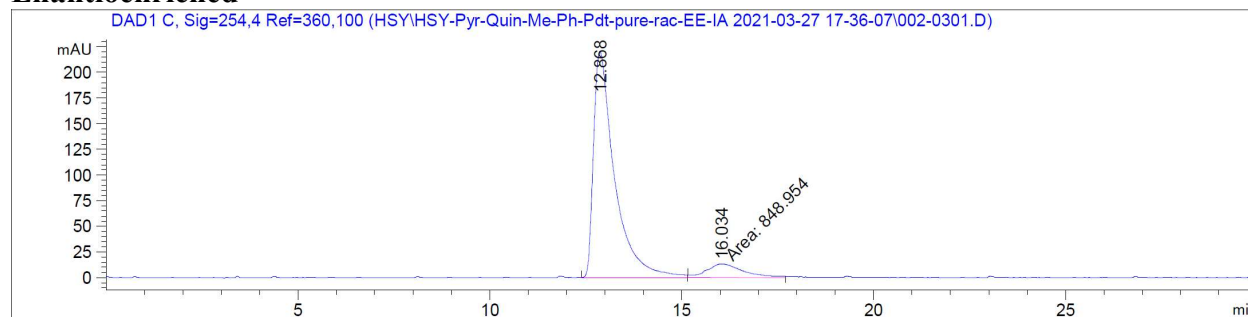

| Peak # | RetTime [min] | Type | Width [min] | Area [mAU*s] | Height [mAU] | Area %  |
|--------|---------------|------|-------------|--------------|--------------|---------|
| 1      | 12.868        | VV   | 0.5519      | 8439.99316   | 220.81288    | 90.8606 |
| 2      | 16.034        | MM   | 1.0931      | 848.95392    | 12.94417     | 9.1394  |

Totals : 9288.94708 233.75705

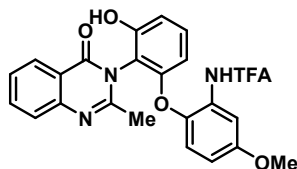

### 2,2,2-trifluoro-*N*-(2-(3-hydroxy-2-(2-methyl-4-oxoquinazolin-3(4*H*)-yl)phenoxy)-5-methoxyphenyl)acetamide (3g)

Prepared according to **GP5** using *N*-(2-bromo-5-methoxyphenyl)-2,2,2-trifluoroacetamide (59.6 mg, 0.2 mmol) and 3-(2,6-dihydroxyphenyl)-2-methylquinazolin-4(3*H*)-one (80.5 mg, 0.3 mmol)

at 40 °C for 48 hours. The arylated quinazolinone was purified by flash column chromatography using hexanes:DCM:acetone (3:1.5:0.75 v:v:v) and was obtained as a white solid (40 mg, 0.082 mmol, 41%).

**<sup>1</sup>H NMR** (500 MHz, CD<sub>2</sub>Cl<sub>2</sub>) δ 9.33 (s, 1H), 8.15 (d, *J* = 7.8 Hz, 1H), 7.88 – 7.81 (m, 1H), 7.70 (t, *J* = 7.5 Hz, 1H), 7.57 (d, *J* = 8.1 Hz, 1H), 7.39 (t, *J* = 7.5 Hz, 1H), 7.14 (t, *J* = 8.3 Hz, 1H), 7.05 (d, *J* = 8.9 Hz, 1H), 6.80 (d, *J* = 8.3 Hz, 1H), 6.78 – 6.70 (m, 1H), 6.24 (d, *J* = 8.3 Hz, 1H), 3.81 (s, 3H), 2.46 (s, 3H).

**<sup>13</sup>C NMR** (151 MHz, CD<sub>2</sub>Cl<sub>2</sub>) δ 161.8, 157.1, 156.3, 155.4 (q, *J* = 38.3 Hz), 154.1, 153.7, 146.6, 137.2, 135.1, 130.9, 129.0, 127.0, 126.9, 125.7, 122.3, 120.1, 115.6 (q, *J* = 288.3 Hz), 113.8, 111.7, 111.2, 108.4, 105.4, 55.7, 22.3.

**<sup>19</sup>F NMR** (471 MHz, CD<sub>2</sub>Cl<sub>2</sub>) δ -75.4.

**IR** (neat film, cm<sup>-1</sup>) 3251, 2951, 1730, 1673, 1608, 1467, 1209.

**HRMS** (ESI) [M+H]<sup>+</sup> calculated 486.1271 m/z (found 486.1276 m/z for C<sub>24</sub>H<sub>19</sub>F<sub>3</sub>N<sub>3</sub>O<sub>5</sub>).

**HPLC** (IA, ethanol/*n*-hexane = 10/90, flow rate = 1.0 mL/min, l = 254 nm) tR = 10.8 min (minor), 13.0 min (major)

### Racemic

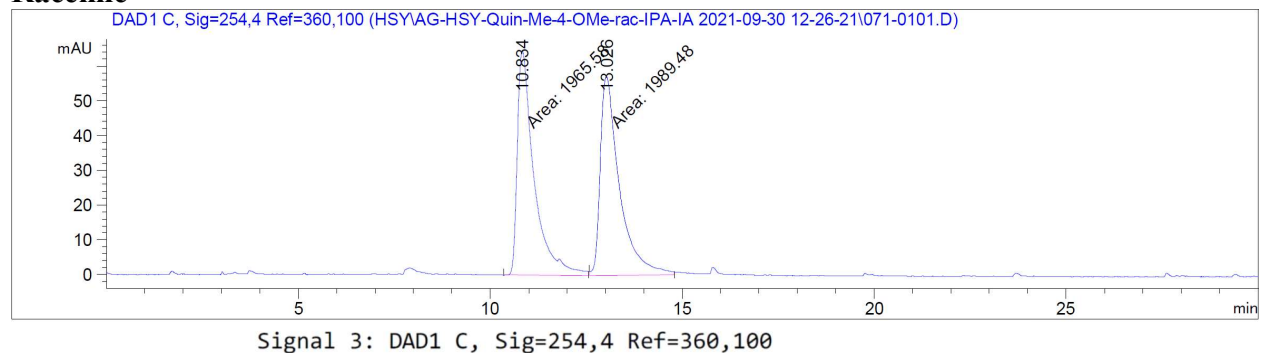

| Peak #   | RetTime [min] | Type | Width [min] | Area [mAU*s] | Height [mAU] | Area %  |
|----------|---------------|------|-------------|--------------|--------------|---------|
| 1        | 10.834        | MM   | 0.5069      | 1965.58167   | 64.63077     | 49.6978 |
| 2        | 13.026        | MM   | 0.5794      | 1989.48364   | 57.22647     | 50.3022 |
| Totals : |               |      |             | 3955.06531   | 121.85723    |         |

### Enantioenriched

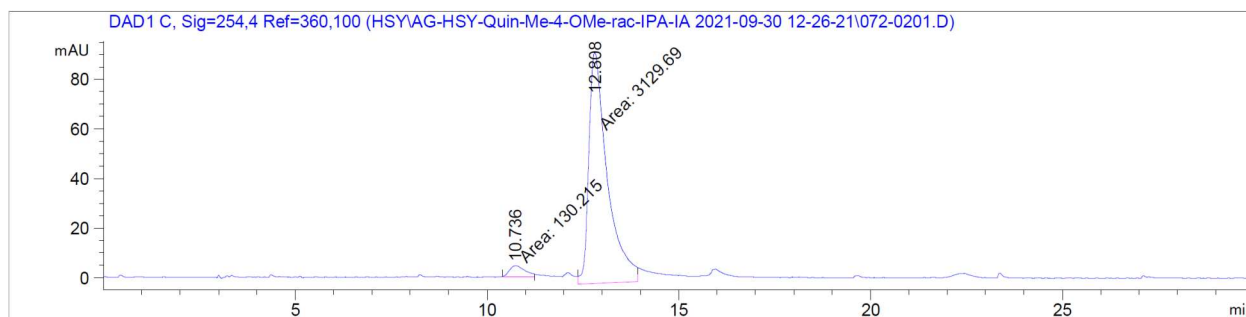

Signal 3: DAD1 C, Sig=254,4 Ref=360,100

| Peak # | RetTime [min] | Type | Width [min] | Area [mAU*s] | Height [mAU] | Area %  |
|--------|---------------|------|-------------|--------------|--------------|---------|
| 1      | 10.736        | MM   | 0.4847      | 130.21454    | 4.47744      | 3.9944  |
| 2      | 12.808        | MM   | 0.5597      | 3129.69165   | 93.20229     | 96.0056 |

Totals : 3259.90619 97.67973

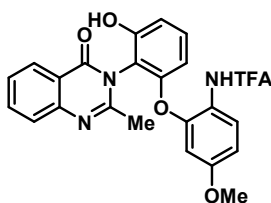

**2,2,2-trifluoro-N-(2-(3-hydroxy-2-(2-methyl-4-oxoquinazolin-3(4H)-yl)phenoxy)-4-methoxyphenyl)acetamide (3h)**

Prepared according to **GP5** using *N*-(2-bromo-4-methoxyphenyl)-2,2,2-trifluoroacetamide (59.6 mg, 0.2 mmol) and 3-(2,6-dihydroxyphenyl)-2-methylquinazolin-4(3*H*)-one (80.5 mg, 0.3 mmol) at 40 °C for 48 hours. The arylated quinazolinone was purified by flash column chromatography using hexanes:DCM:acetonitrile (1:1:1 v:v:v) and was obtained as a white solid (53 mg, 0.114 mmol, 57%).

**<sup>1</sup>H NMR** (600 MHz, CD<sub>3</sub>OD) δ 8.20 – 8.14 (m, 1H), 7.84 – 7.76 (m, 1H), 7.63 (d, *J* = 8.2 Hz, 1H), 7.47 (t, *J* = 7.2 Hz, 1H), 7.40 (d, *J* = 9.1 Hz, 1H), 7.27 (t, *J* = 8.4 Hz, 1H), 6.80 (dd, *J* = 8.4, 1.1 Hz, 1H), 6.75 – 6.68 (m, 2H), 6.45 (dd, *J* = 8.4, 1.1 Hz, 1H), 3.72 (s, 3H), 2.33 (s, 3H).

**<sup>13</sup>C NMR** (151 MHz, CD<sub>3</sub>OD) δ 161.8, 159.6, 156.2, 156.1 (q, *J* = 37.3 Hz), 154.4, 153.3, 149.7, 147.2, 134.7, 130.6, 127.1, 126.5, 126.4, 125.8, 120.1, 118.9, 117.0 (q, *J* = 287.3 Hz), 115.2, 111.1, 110.1, 107.8, 105.7, 54.7, 21.2.

**<sup>19</sup>F NMR** (376 MHz, CD<sub>3</sub>OD) δ -76.8.

**IR** (neat film, cm<sup>-1</sup>) 3302, 2946, 2835, 1717, 1673, 1606, 1547, 1471, 1275, 1158, 1020.

**HRMS** (ESI) [M+H]<sup>+</sup> calculated 486.1271 m/z (found 486.1276 m/z for C<sub>24</sub>H<sub>19</sub>F<sub>3</sub>N<sub>3</sub>O<sub>5</sub>).

HPLC (IA, ethanol/*n*-hexane = 10/90, flow rate = 1.0 mL/min,  $\lambda$  = 254 nm) tR = 16.9 min (minor), 18.4 min (major)

### Racemic

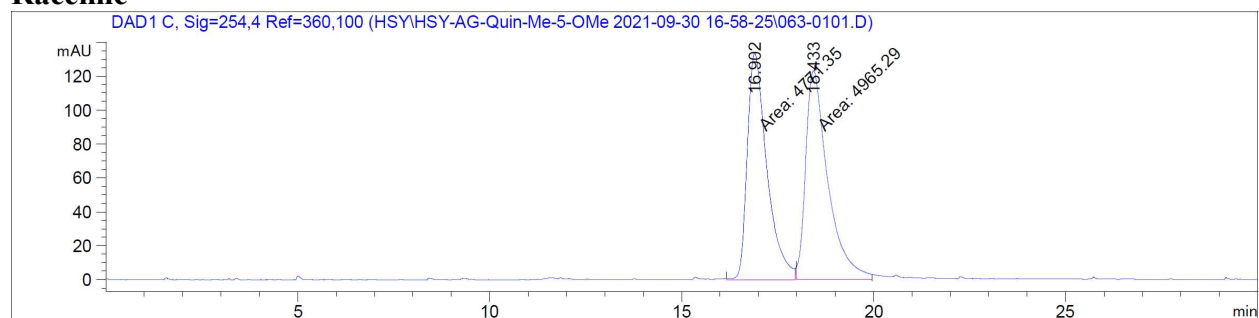

Signal 3: DAD1 C, Sig=254,4 Ref=360,100

| Peak # | RetTime [min] | Type | Width [min] | Area [mAU*s] | Height [mAU] | Area %  |
|--------|---------------|------|-------------|--------------|--------------|---------|
| 1      | 16.902        | MM   | 0.5939      | 4771.34521   | 133.90636    | 49.0040 |
| 2      | 18.433        | MM   | 0.6728      | 4965.29492   | 122.99427    | 50.9960 |

Totals : 9736.64014 256.90063

### Enantioenriched

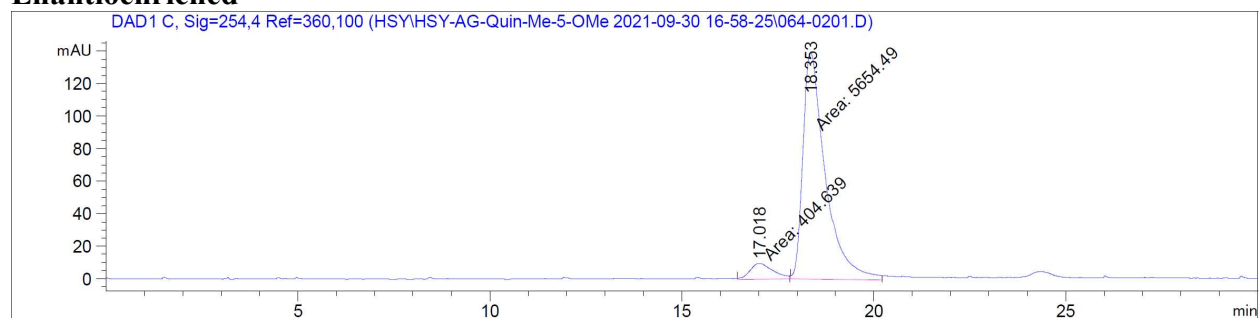

Signal 3: DAD1 C, Sig=254,4 Ref=360,100

| Peak # | RetTime [min] | Type | Width [min] | Area [mAU*s] | Height [mAU] | Area %  |
|--------|---------------|------|-------------|--------------|--------------|---------|
| 1      | 17.018        | MM   | 0.6982      | 404.63861    | 9.65964      | 6.6782  |
| 2      | 18.353        | MM   | 0.6768      | 5654.49316   | 139.25217    | 93.3218 |

Totals : 6059.13177 148.91181

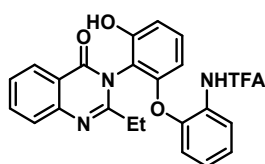

***N*-(2-(2-(2-ethyl-4-oxoquinazolin-3(4*H*)-yl)-3-hydroxyphenoxy)phenyl)-2,2,2-trifluoroacetamide (3i)**

Prepared according to **GP5** using *N*-(2-bromophenyl)-2,2,2-trifluoroacetamide (53.6 mg, 0.2 mmol) and 3-(2,6-dihydroxyphenyl)-2-ethylquinazolin-4(3*H*)-one (84.7 mg, 0.3 mmol) at 40 °C for 48 hours. The arylated quinazolinone was purified by flash column chromatography using hexanes:DCM:acetone (3:0.5:1 v:v:v) and was obtained as a white solid (47 mg, 0.1 mmol, 50%).

**<sup>1</sup>H NMR** (600 MHz, CD<sub>3</sub>OD) δ 8.16 (dd, *J* = 8.0, 1.5 Hz, 1H), 7.81 – 7.76 (m, 1H), 7.69 (d, *J* = 8.2 Hz, 1H), 7.63 (dd, *J* = 8.0, 1.6 Hz, 1H), 7.49 – 7.42 (m, 1H), 7.29 – 7.22 (m, 2H), 7.17 (td, *J* = 7.8, 1.4 Hz, 1H), 7.14 (dd, *J* = 8.2, 1.4 Hz, 1H), 6.78 (dd, *J* = 8.4, 1.1 Hz, 1H), 6.39 (dd, *J* = 8.4, 1.1 Hz, 1H), 2.68 – 2.54 (m, 2H), 1.24 (t, *J* = 7.5 Hz, 3H).

**<sup>13</sup>C NMR** (151 MHz, CD<sub>3</sub>OD) δ 162.1, 159.4, 155.8 (q, *J* = 37.7 Hz), 154.4, 153.7, 148.2, 147.5, 134.5, 130.5, 127.8, 126.7, 126.3, 126.3, 125.7, 124.5, 120.4, 120.1, 115.9 (q, *J* = 287.6 Hz), 114.9, 110.9, 107.4, 27.9, 9.9.

**<sup>19</sup>F NMR** (376 MHz, CD<sub>3</sub>OD) δ -76.8.

**IR** (neat film, cm<sup>-1</sup>) 3247, 3068, 1727, 1667, 1605, 1470, 1285, 1259, 1211, 1154.

**HRMS** (ESI) [M+H]<sup>+</sup> calculated 470.1322 m/z (found 470.1331 m/z for C<sub>24</sub>H<sub>19</sub>F<sub>3</sub>N<sub>3</sub>O<sub>4</sub>).

**HPLC** (IA, ethanol/*n*-hexane = 5/95, flow rate = 1.0 mL/min, λ = 254 nm) tR = 7.9 min (minor), .95 min (major)

**Racemic**

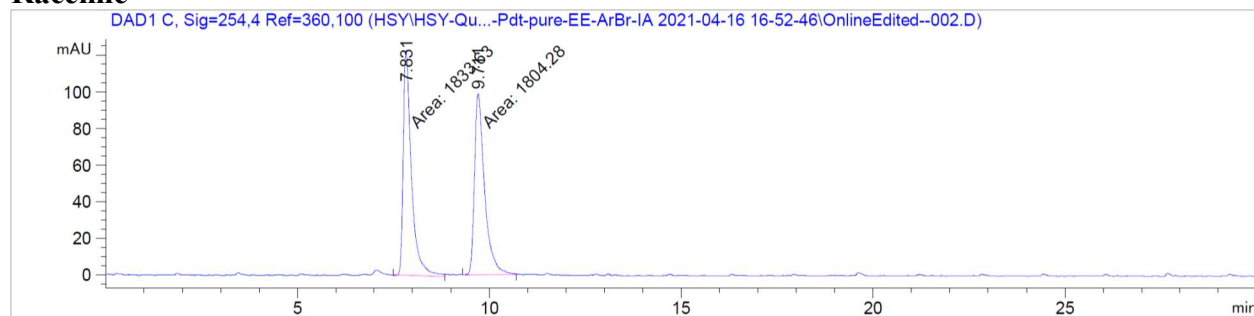

Signal 3: DAD1 C, Sig=254,4 Ref=360,100

| Peak # | RetTime [min] | Type | Width [min] | Area [mAU*s] | Height [mAU] | Area %  |
|--------|---------------|------|-------------|--------------|--------------|---------|
| 1      | 7.831         | MM   | 0.2490      | 1833.63330   | 122.74162    | 50.4034 |
| 2      | 9.711         | MM   | 0.3049      | 1804.28296   | 98.61400     | 49.5966 |

Totals : 3637.91626 221.35562

**Enantioenriched**

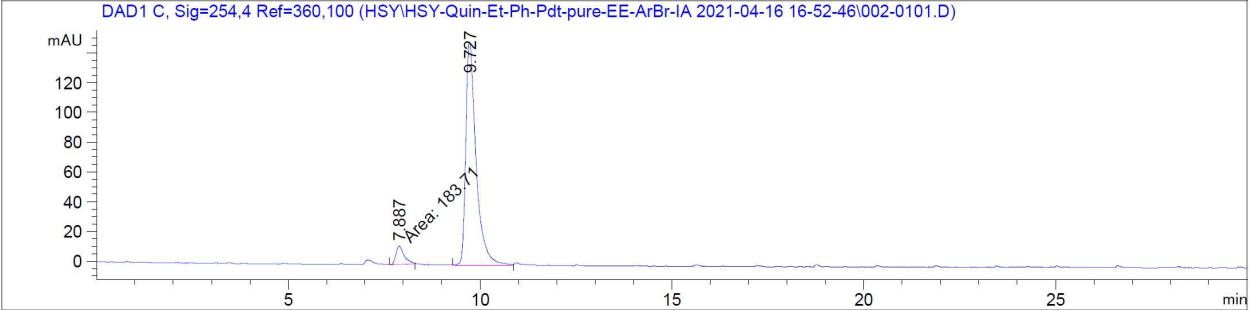

Signal 3: DAD1 C, Sig=254,4 Ref=360,100

| Peak # | RetTime [min] | Type | Width [min] | Area [mAU*s] | Height [mAU] | Area %  |
|--------|---------------|------|-------------|--------------|--------------|---------|
| 1      | 7.887         | MM   | 0.2485      | 183.71024    | 12.31980     | 6.1358  |
| 2      | 9.727         | VV   | 0.2763      | 2810.33960   | 150.16862    | 93.8642 |

Totals :                                          2994.04984    162.48842



## Derivatizations:

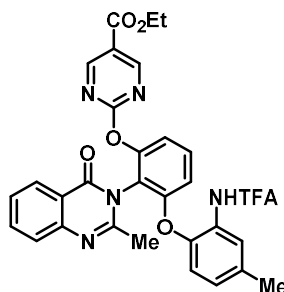

### Ethyl 2-(3-(4-methyl-2-(2,2,2-trifluoroacetamido)phenoxy)-2-(2-methyl-4-oxoquinazolin-3(4H)-yl)phenoxy)pyrimidine-5-carboxylate (**4**)

To a two dram vial equipped with a magnetic stir bar was added 2,2,2-trifluoro-*N*-(2-(3-hydroxy-2-(2-methyl-4-oxoquinazolin-3(4*H*)-yl)phenoxy)-5-methylphenyl)acetamide (**3a**) (47 mg, 0.1 mmol), Cs<sub>2</sub>CO<sub>3</sub> (37 mg, 0.115 mmol), and ethyl 2-chloropyrimidine-5-carboxylate (21 mg, 0.115 mmol). The vial was cooled to 0 °C and DMF (1 mL) was added. The reaction stirred at 0 °C for 1 hour before stirring at room temperature for 21 hours. The reaction was then diluted with EtOAc and washed with water (3x) and brine. The crude residue was purified via flash column chromatography using hexanes:DCM:acetone (7:7:1 v:v) to yield **4** as a white solid (58.2 mg, 94% yield).

**<sup>1</sup>H NMR** (600 MHz, CD<sub>3</sub>OD) δ 8.91 (s, 2H), 8.02 (d, *J* = 7.9 Hz, 1H), 7.72 (t, *J* = 8.2 Hz, 1H), 7.53 (t, *J* = 8.4 Hz, 2H), 7.44 – 7.37 (m, 2H), 7.24 (d, *J* = 8.3 Hz, 1H), 7.10 (d, *J* = 8.4 Hz, 1H), 7.06 (d, *J* = 8.4 Hz, 1H), 6.90 (d, *J* = 8.5 Hz, 1H), 4.31 (q, *J* = 7.1 Hz, 2H), 2.39 (s, 3H), 2.28 (s, 3H), 1.32 (t, *J* = 7.1 Hz, 3H).

**<sup>13</sup>C NMR** (151 MHz, CD<sub>3</sub>OD) δ 165.6, 162.8, 161.1, 161.0, 155.9 (q, *J* = 37.6 Hz), 155.2, 154.1, 149.7, 146.9, 146.0, 135.4, 134.9, 130.8, 128.7, 126.7, 126.5, 126.4, 126.3, 126.0, 120.8, 120.2, 119.6, 117.6, 119.1 – 112.9 (q, *J* = 287.6 Hz), 114.1, 61.4, 21.5, 19.4, 13.0.

**<sup>19</sup>F NMR** (376 MHz, CD<sub>3</sub>OD) δ = -76.6.

**IR** (neat film, cm<sup>-1</sup>) 3367, 3071, 2972, 1727, 1681, 1606, 1468, 1425, 1284, 1207, 1159, 1017.

**HRMS** (ESI) [M+H]<sup>+</sup> calculated 620.1751 m/z (found 620.1752 m/z for C<sub>31</sub>H<sub>25</sub>F<sub>3</sub>N<sub>5</sub>O<sub>6</sub>s).

**HPLC** (IA, ethanol/*n*-hexane = 8/92, flow rate = 1.0 mL/min, l = 254 nm) tR = 25.9 min (major), 31.1 min (minor)

**Racemic**

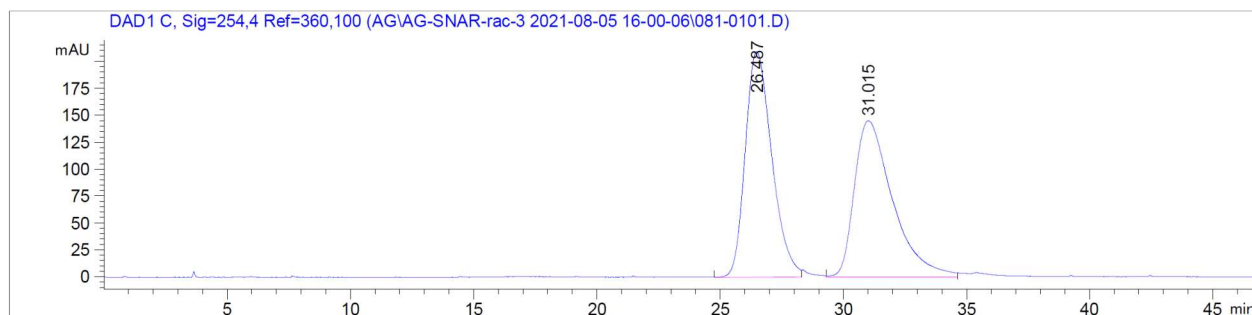

Signal 3: DAD1 C, Sig=254,4 Ref=360,100

| Peak # | RetTime [min] | Type | Width [min] | Area [mAU*s] | Height [mAU] | Area %  |
|--------|---------------|------|-------------|--------------|--------------|---------|
| 1      | 26.487        | VV   | 1.1565      | 1.57621e4    | 209.79991    | 50.0254 |
| 2      | 31.015        | VV   | 1.5568      | 1.57461e4    | 145.46889    | 49.9746 |

Totals : 3.15081e4 355.26880

## Enantioenriched

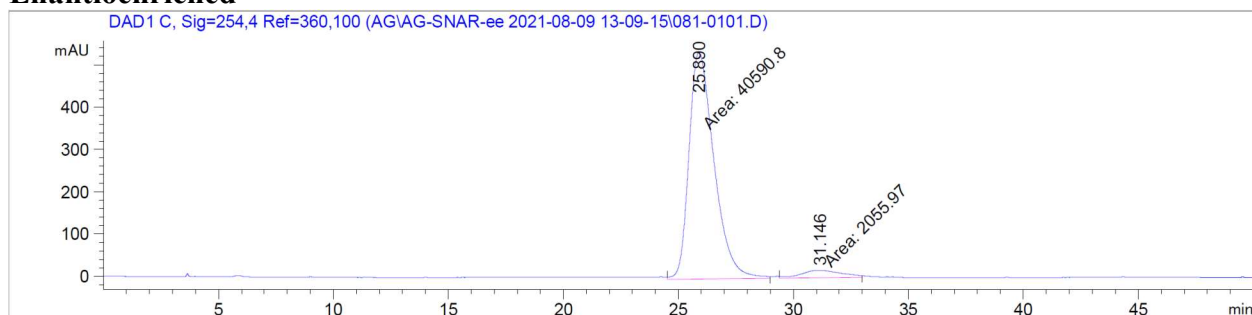

Signal 3: DAD1 C, Sig=254,4 Ref=360,100

| Peak # | RetTime [min] | Type | Width [min] | Area [mAU*s] | Height [mAU] | Area %  |
|--------|---------------|------|-------------|--------------|--------------|---------|
| 1      | 25.890        | MM   | 1.2612      | 4.05908e4    | 536.39655    | 95.1791 |
| 2      | 31.146        | MM   | 1.9656      | 2055.96777   | 17.43281     | 4.8209  |

Totals : 4.26468e4 553.82936

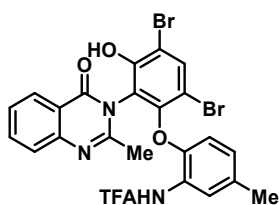

### ***N*-(2-(4,6-dibromo-3-hydroxy-2-(2-methyl-4-oxoquinazolin-3(4*H*)-yl)phenoxy)-5-methylphenyl)-2,2,2-trifluoroacetamide (**5**)**

To a two dram vial equipped with a magnetic stir bar was added **3a** (47 mg, 0.1 mmol), DCM (1 mL), and Et<sub>3</sub>N (0.001 mL, 0.01 mmol). The solution was cooled to 0 °C and NBS (36 mg, 0.2

mmol) was added. The reaction was allowed to slowly warm to room temperature over 3 hours at which point it was diluted with DCM and washed with 1 M HCl<sub>(aq)</sub>. The residue was purified via reversed phase chromatography (MeOH:H<sub>2</sub>O) to afford **5** as an off white solid (56.4 mg, 90% yield).

<sup>1</sup>H NMR (500 MHz, CD<sub>3</sub>OD) δ 8.03 (s, 1H), 7.97 (s, 1H), 7.79 – 7.69 (m, 1H), 7.55 (d, *J* = 8.2 Hz, 1H), 7.41 (t, *J* = 7.5 Hz, 1H), 7.27 (s, 1H), 6.87 (d, *J* = 8.3 Hz, 1H), 6.65 (d, *J* = 8.4 Hz, 1H), 2.14 (s, 3H). Note: 3H at 2.21 is missing.

<sup>13</sup>C NMR (126 MHz, CD<sub>3</sub>OD) δ 161.3, 155.2 (t, *J* = 37.5 Hz), 154.5, 151.9, 148.4, 146.9, 136.8, 134.7, 133.2, 127.3, 126.5, 126.2, 126.1, 124.6, 123.8, 121.2, 119.8, 115.8 (q, *J* = 287.5 Hz), 115.3, 108.5, 106.7, 19.2. Note: Missing 1C in aliphatic region.

<sup>19</sup>F NMR (471 MHz, CD<sub>3</sub>OD) δ = -76.8.

IR (neat film, cm<sup>-1</sup>) 3366, 2946, 2834, 1729, 1678, 1606, 1437, 1206, 1020.

HRMS (ESI) [M+H]<sup>+</sup> calculated 627.9514 m/z (found 627.9512 m/z for C<sub>24</sub>H<sub>17</sub>Br<sub>2</sub>F<sub>3</sub>N<sub>3</sub>O<sub>4</sub>).

HPLC (IA, ethanol/*n*-hexane = 8/92, flow rate = 1.0 mL/min, λ = 265 nm) tR = 5.9 min (major), 7.7 min (minor)

## Racemic

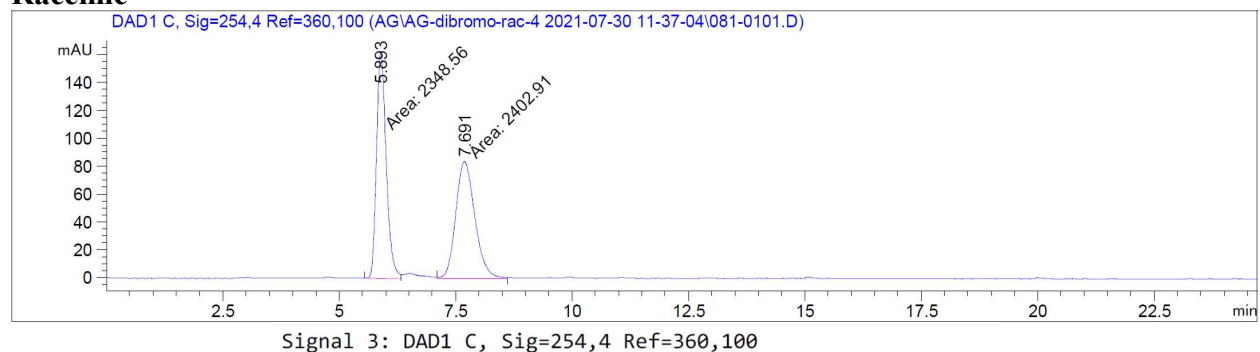

## Enantioenriched

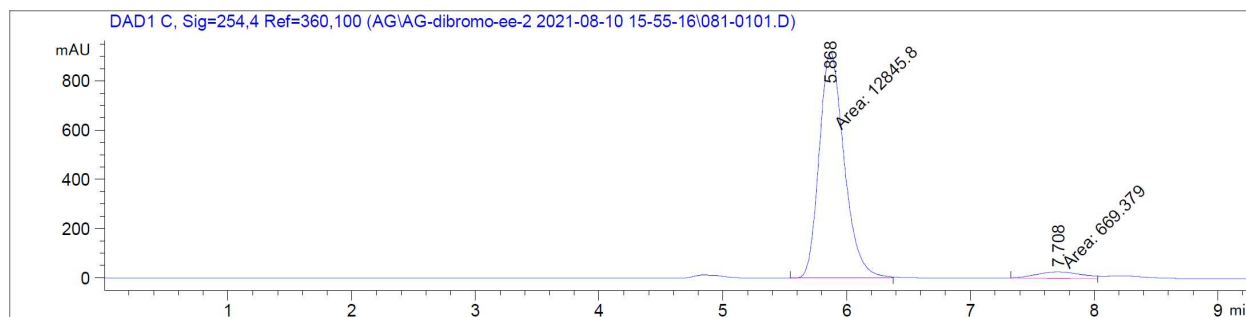

Signal 3: DAD1 C, Sig=254,4 Ref=360,100

| Peak #   | RetTime [min] | Type | Width [min] | Area [mAU*s] | Height [mAU] | Area %  |
|----------|---------------|------|-------------|--------------|--------------|---------|
| 1        | 5.868         | MM   | 0.2332      | 1.28458e4    | 918.21710    | 95.0472 |
| 2        | 7.708         | MM   | 0.4260      | 669.37909    | 26.18668     | 4.9528  |
| Totals : |               |      |             | 1.35152e4    | 944.40378    |         |

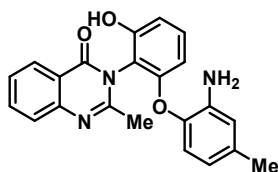

### 3-(2-(2-amino-4-methylphenoxy)-6-hydroxyphenyl)-2-methylquinazolin-4(3H)-one (**6**)

To a 2-dram vial equipped with a magnetic stir bar was added **3a** (47 mg, 0.1 mmol),  $K_2CO_3$  (28 mg, 0.2 mmol), MeOH (0.5 mL), and water (0.5 mmol). The vial was sealed and heated at 60 °C for 1 hour before cooling to room temperature. The reaction mixture was diluted with ca. 1 mL water before acidifying with 0.3 mL 1 M  $HCl_{(aq)}$ . The resulting precipitate was isolated by filtration to yield **6** as a light orange solid (34.4 mg, 92% yield).

**$^1H$  NMR** (600 MHz,  $DMSO-d_6$ )  $\delta$  10.28 (s, 1H), 8.11 (dd,  $J = 8.0, 1.5$  Hz, 1H), 7.83 (t,  $J = 7.7$  Hz, 1H), 7.65 (d,  $J = 8.1$  Hz, 1H), 7.50 (t,  $J = 7.5$  Hz, 1H), 7.16 (t,  $J = 8.4$  Hz, 1H), 6.76 (d,  $J = 8.0$  Hz, 1H), 6.69 (dd,  $J = 8.3, 0.9$  Hz, 1H), 6.54 (s, 1H), 6.36 (d,  $J = 7.8$  Hz, 1H), 6.15 – 6.05 (m, 1H), 2.28 (s, 3H), 2.14 (s, 3H).

**$^{13}C$  NMR** (151 MHz,  $DMSO-d_6$ )  $\delta$  161.4, 155.8, 154.8, 154.4, 147.9, 139.8, 138.1, 135.5, 135.3, 130.8, 127.1, 127.0, 126.8, 122.2, 120.6, 117.8, 117.0, 114.2, 110.4, 105.3, 23.0, 21.2.

**IR** (neat film,  $cm^{-1}$ ) 3360, 2945, 2832, 1666, 1606, 1508, 1468, 1349, 1307, 1161, 1118.

**HRMS** (ESI)  $[M+H]^+$  calculated 374.1499 m/z (found 374.1509 m/z for  $C_{22}H_{20}N_3O_3$ ).

**HPLC** (IA, ethanol/*n*-hexane = 8/92, flow rate = 1.0 mL/min,  $\lambda = 265$  nm) tR = 7.9 min (minor), 9.8 min (major)

**Racemic**

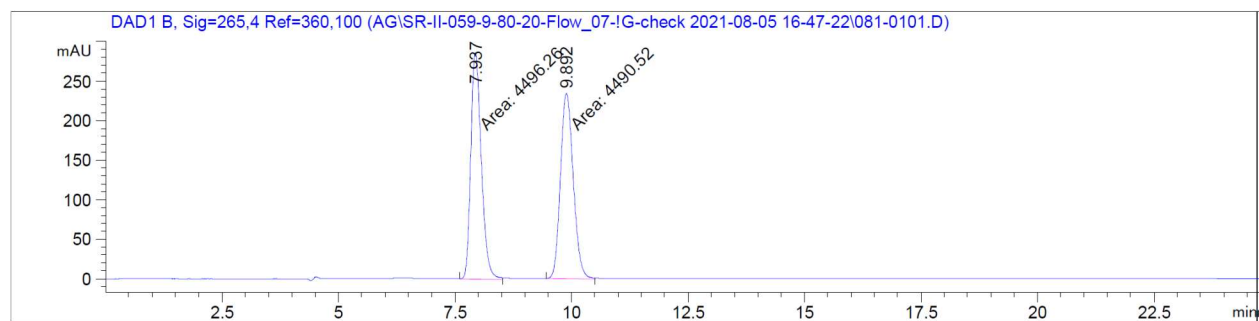

Signal 1: DAD1 B, Sig=265,4 Ref=360,100

| Peak # | RetTime [min] | Type | Width [min] | Area [mAU*s] | Height [mAU] | Area %  |
|--------|---------------|------|-------------|--------------|--------------|---------|
| 1      | 7.937         | MM   | 0.2615      | 4496.25830   | 286.55505    | 50.0319 |
| 2      | 9.892         | MM   | 0.3190      | 4490.51758   | 234.59312    | 49.9681 |

Totals : 8986.77588 521.14818

### Enantioenriched

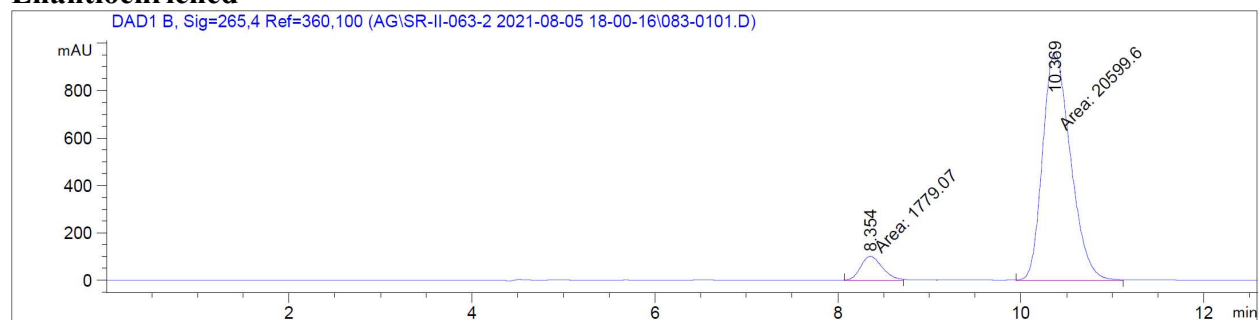

Signal 1: DAD1 B, Sig=265,4 Ref=360,100

| Peak # | RetTime [min] | Type | Width [min] | Area [mAU*s] | Height [mAU] | Area %  |
|--------|---------------|------|-------------|--------------|--------------|---------|
| 1      | 8.354         | MM   | 0.2861      | 1779.07471   | 103.63993    | 7.9498  |
| 2      | 10.369        | MM   | 0.3555      | 2.05996e4    | 965.89270    | 92.0502 |

Totals : 2.23787e4 1069.53263

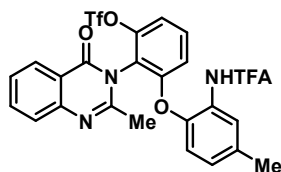

### 3-(4-methyl-2-(2,2,2-trifluoroacetamido)phenoxy)-2-(2-methyl-4-oxoquinazolin-3(4H)-yl)phenyl trifluoromethanesulfonate (7')

To a flame dried two dram vial equipped with a magnetic stir bar under argon atmosphere was added 2,2,2-trifluoro-*N*-(2-(3-hydroxy-2-(2-methyl-4-oxoquinazolin-3(4H)-yl)phenoxy)-5-methylphenyl)acetamide (**3a**) (47 mg, 0.1 mmol), DCM (1 mL) and pyridine (24  $\mu$ L, 0.3 mmol).

The solution was cooled to 0 °C and Tf<sub>2</sub>O (25 μL, 0.15 mmol) was added dropwise over 5 minutes. The reaction stirred for 1 hour at 0 °C before an additional portion of Tf<sub>2</sub>O (10 μL, 0.06 mmol) was added dropwise. After stirring for an additional hour at 0 °C, the reaction was quenched by addition of water (1 mL) and DCM (1 mL). The layers were separated and the organic layer was washed with water, dried over Na<sub>2</sub>SO<sub>4</sub> and purified via flash chromatography (2% acetone in 1:1 DCM/hexanes) to yield aryl triflate **7'** as a white foam (50.5 mg, 84% yield).

**<sup>1</sup>H NMR** (400 MHz, CDCl<sub>3</sub>) δ 9.46 (s, 1H), 8.27 (dd, *J* = 8.0, 1.5 Hz, 1H), 7.97 (s, 1H), 7.81 (ddd, *J* = 8.5, 7.1, 1.5 Hz, 1H), 7.72 (dd, *J* = 8.3, 1.2 Hz, 1H), 7.54 – 7.42 (m, 2H), 7.28 – 7.23 (m, 1H), 7.09 – 6.98 (m, 2H), 6.86 (dd, *J* = 8.6, 1.1 Hz, 1H), 2.40 (s, 3H), 2.37 (s, 3H).

**<sup>13</sup>C NMR** (151 MHz, CDCl<sub>3</sub>) δ 161.4, 156.0 (q, *J* = 38.6 Hz), 154.7, 153.3, 147.2, 145.8, 141.7, 136.9, 135.5, 131.7, 127.8, 127.5, 127.5, 127.4, 127.0, 125.1, 121.4, 112.0, 119.8, 118.4 (q, *J* = 320.8 Hz), 116.3, 115.7 (q, *J* = 288.1 Hz), 114.8, 23.0, 21.3.

**<sup>19</sup>F NMR** (376 MHz, CDCl<sub>3</sub>) δ = -73.6, -75.4.

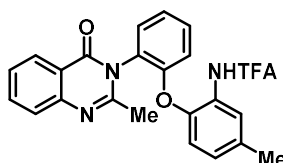

**2,2,2-trifluoro-N-(5-methyl-2-(2-(2-methyl-4-oxoquinazolin-3(4H)-yl)phenoxy)phenyl)acetamide (**7**)**

To a flame dried two dram vial equipped with a magnetic stir bar under argon atmosphere was added aryl triflate (**4'**) (51 mg, 0.084 mmol) PdCl<sub>2</sub>(PPh<sub>3</sub>)<sub>2</sub> (6 mg, 0.008 mmol), dppp (5 mg, 0.013 mmol), anhydrous DMF (0.85 mL), Et<sub>3</sub>N (0.12 mL, 0.84 mmol), and formic acid (0.019 mL, 0.5 mmol) before a Teflon lined screw cap was fitted. The vial was sealed with Teflon tape and heated to 60 °C for 18 hours. The reaction mixture was then diluted with EtOAc, which was washed with 1 M HCl(aq), and water. The crude residue was purified via flash column chromatography using hexanes:EtOAc (7:3 v:v) to yield **7** as a white solid (14.5 mg, 38 % yield).

**<sup>1</sup>H NMR** (400 MHz, CDCl<sub>3</sub>) δ 9.46 (s, 1H), 8.27 (dd, *J* = 8.0, 1.5 Hz, 1H), 8.00 (s, 1H), 7.79 (ddd, *J* = 8.5, 7.1, 1.5 Hz, 1H), 7.74 – 7.68 (m, 1H), 7.48 (ddd, *J* = 8.2, 7.1, 1.2 Hz, 1H), 7.37 (ddd, *J* = 8.3, 7.4, 1.7 Hz, 1H), 7.30 (dd, *J* = 7.8, 1.7 Hz, 1H), 7.20 (td, *J* = 7.6, 1.3 Hz, 1H), 7.00 (m, 2H), 6.81 (dd, *J* = 8.3, 1.3 Hz, 1H), 2.39 (s, 3H), 2.36 (s, 3H).

**<sup>13</sup>C NMR** (151 MHz, CDCl<sub>3</sub>) δ 162.2, 155.9 (q, *J* = 38.3 Hz), 154.2, 152.9, 147.6, 141.9, 136.2, 135.1, 131.2, 129.5, 127.7, 127.4, 127.4, 127.0, 126.9, 126.5, 124.6, 123.6, 121.6, 120.5, 115.8 (q, *J* = 288.4 Hz), 115.3, 24.4, 21.3.

**<sup>19</sup>F NMR** (376 MHz, CDCl<sub>3</sub>) δ = -75.3.

**IR** (neat film, cm<sup>-1</sup>) 3247, 3071, 2925, 1730, 1672, 1607, 1490, 1343, 1267, 1211, 1163.

**HRMS** (ESI) [M+H]<sup>+</sup> calculated 454.1379 m/z (found 454.1369 m/z for C<sub>24</sub>H<sub>19</sub>F<sub>3</sub>N<sub>3</sub>O<sub>3</sub>).

HPLC (IA, ethanol/*n*-hexane = 15/85, flow rate = 1.0 mL/min,  $\lambda$  = 254 nm) tR = 5.7 min (minor), 9.2 min (major)

### Racemic

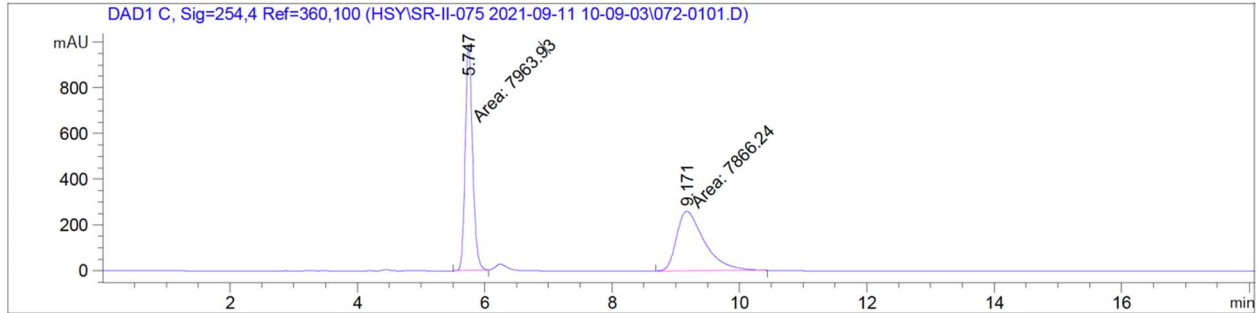

Signal 3: DAD1 C, Sig=254,4 Ref=360,100

| Peak # | RetTime [min] | Type | Width [min] | Area [mAU*s] | Height [mAU] | Area %  |
|--------|---------------|------|-------------|--------------|--------------|---------|
| 1      | 5.747         | MM   | 0.1343      | 7963.92871   | 988.29980    | 50.3085 |
| 2      | 9.171         | MM   | 0.5044      | 7866.24170   | 259.93979    | 49.6915 |

### Enantioenriched

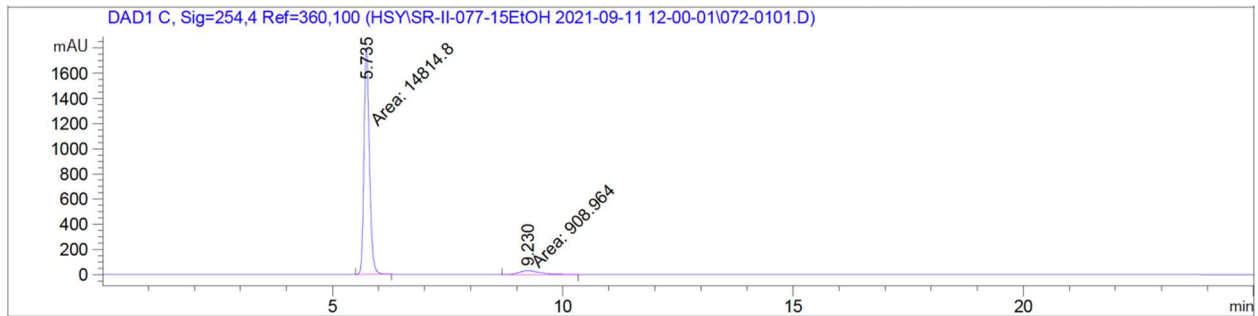

Signal 3: DAD1 C, Sig=254,4 Ref=360,100

| Peak # | RetTime [min] | Type | Width [min] | Area [mAU*s] | Height [mAU] | Area %  |
|--------|---------------|------|-------------|--------------|--------------|---------|
| 1      | 5.735         | MM   | 0.1368      | 1.48148e4    | 1804.30505   | 94.2192 |
| 2      | 9.230         | MM   | 0.5138      | 908.96362    | 29.48417     | 5.7808  |

## X-Ray Crystal Structure

### Experimental

The crystal was grown via slow diffusion of hexanes into DCM. Note, gentle heating (35 °C was needed to fully dissolve the product.)

Low-temperature diffraction data ( $\omega$ -scans) were collected on a Rigaku MicroMax-007HF diffractometer coupled to a Saturn994+ CCD detector with Cu K $\alpha$  ( $\lambda = 1.54178 \text{ \AA}$ ) for the structure of 007a-21048. The diffraction images were processed and scaled using Rigaku Oxford Diffraction software (CrysAlisPro; Rigaku OD: The Woodlands, TX, 2015). The structure was solved with SHELXT and was refined against  $F^2$  on all data by full-matrix least squares with SHELXL (Sheldrick, G. M. *Acta Cryst.* 2008, A64, 112–122). All non-hydrogen atoms were refined anisotropically. Hydrogen atoms were included in the model at geometrically calculated positions and refined using a riding model. The isotropic displacement parameters of all hydrogen atoms were fixed to 1.2 times the U value of the atoms to which they are linked (1.5 times for methyl groups). The full numbering scheme of compound 007a-21048 can be found in the full details of the X-ray structure determination (CIF), which is included as Supporting Information. CCDC number 007a-21048 contains the supplementary crystallographic data for this paper. These data can be obtained free of charge from The Cambridge Crystallographic Data Center via [www.ccdc.cam.ac.uk/data\\_request/cif](http://www.ccdc.cam.ac.uk/data_request/cif).



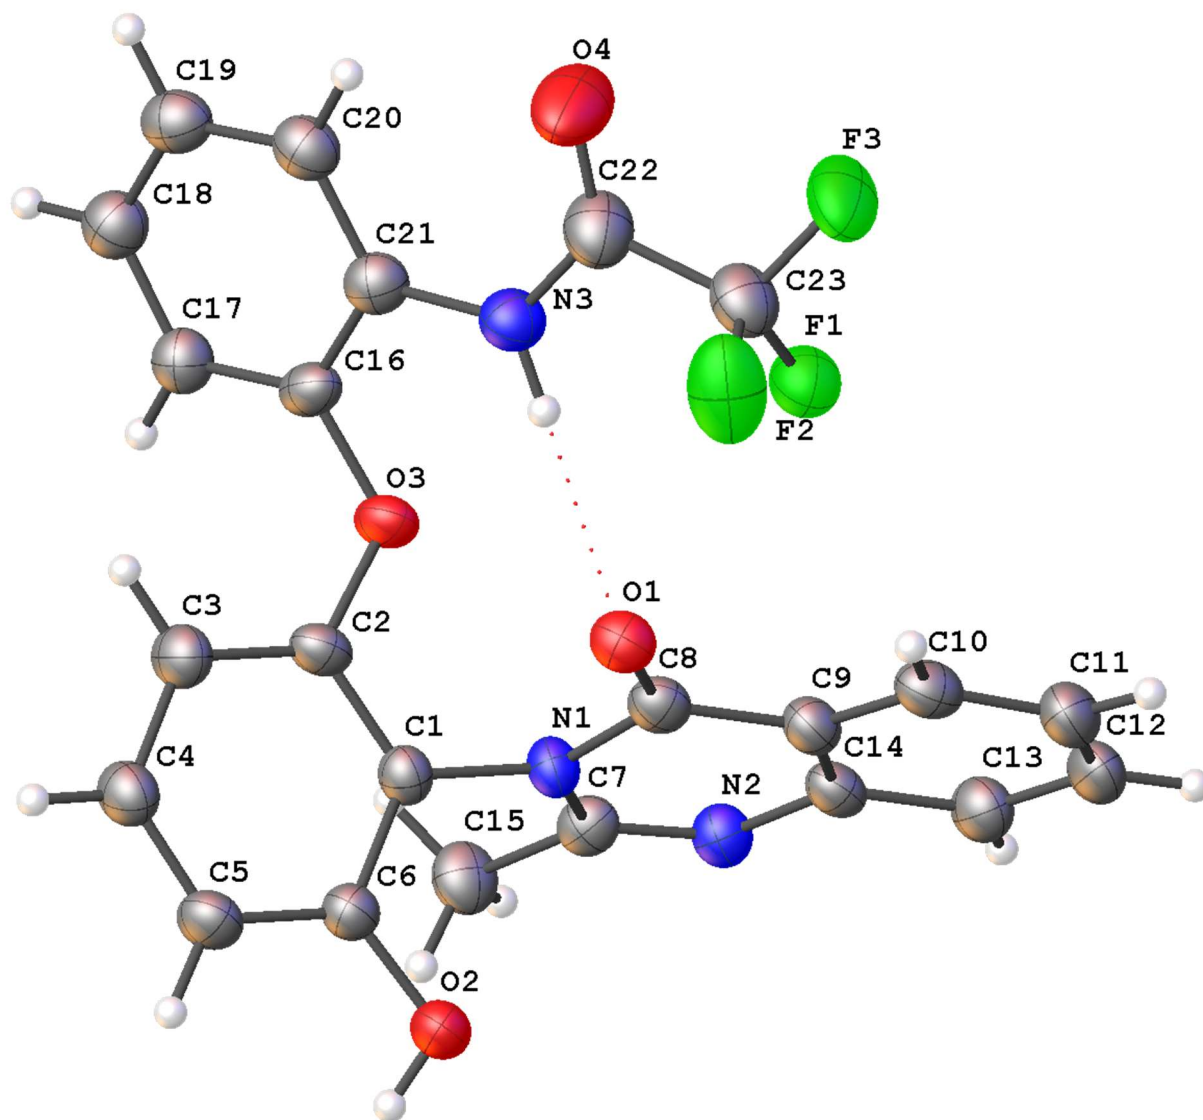

Figure 1. The complete numbering scheme of 007a-21048 with 50% thermal ellipsoid probability levels. The hydrogen atoms are shown as circles for clarity.

Table 1. Crystal data and structure refinement for 007a-21048

|                                   |                                                                              |          |
|-----------------------------------|------------------------------------------------------------------------------|----------|
| Identification code               | 007a-21048                                                                   |          |
| Empirical formula                 | C <sub>23</sub> H <sub>16</sub> F <sub>3</sub> N <sub>3</sub> O <sub>4</sub> |          |
| Formula weight                    | 455.39                                                                       |          |
| Temperature                       | 93(2) K                                                                      |          |
| Wavelength                        | 1.54184 Å                                                                    |          |
| Crystal system                    | Orthorhombic                                                                 |          |
| Space group                       | P2 <sub>1</sub> 2 <sub>1</sub> 2 <sub>1</sub>                                |          |
| Unit cell dimensions              | a = 9.1852(3) Å                                                              | α = 90°. |
|                                   | b = 11.0182(4) Å                                                             | β = 90°. |
|                                   | c = 20.1500(7) Å                                                             | γ = 90°. |
| Volume                            | 2039.27(12) Å <sup>3</sup>                                                   |          |
| Z                                 | 4                                                                            |          |
| Density (calculated)              | 1.483 Mg/m <sup>3</sup>                                                      |          |
| Absorption coefficient            | 1.041 mm <sup>-1</sup>                                                       |          |
| F(000)                            | 936                                                                          |          |
| Crystal size                      | 0.200 x 0.200 x 0.080 mm <sup>3</sup>                                        |          |
| Crystal color and habit           | Colorless Block                                                              |          |
| Diffractometer                    | Rigaku Saturn 944+ CCD                                                       |          |
| Theta range for data collection   | 4.388 to 66.601°.                                                            |          |
| Index ranges                      | -10 ≤ h ≤ 10, -13 ≤ k ≤ 13, -23 ≤ l ≤ 23                                     |          |
| Reflections collected             | 73479                                                                        |          |
| Independent reflections           | 3604 [R(int) = 0.1814]                                                       |          |
| Observed reflections (I > 2σ(I))  | 2797                                                                         |          |
| Completeness to theta = 66.601°   | 100.0 %                                                                      |          |
| Absorption correction             | Semi-empirical from equivalents                                              |          |
| Max. and min. transmission        | 1.00000 and 0.64670                                                          |          |
| Solution method                   | SHELXT-2014/5 (Sheldrick, 2014)                                              |          |
| Refinement method                 | SHELXL-2014/7 (Sheldrick, 2014)                                              |          |
| Data / restraints / parameters    | 3604 / 0 / 300                                                               |          |
| Goodness-of-fit on F <sup>2</sup> | 1.024                                                                        |          |
| Final R indices [I > 2σ(I)]       | R1 = 0.0505, wR2 = 0.1153                                                    |          |
| R indices (all data)              | R1 = 0.0731, wR2 = 0.1278                                                    |          |
| Absolute structure parameter      | 0.05(15)                                                                     |          |
| Extinction coefficient            | n/a                                                                          |          |
| Largest diff. peak and hole       | 0.188 and -0.228 e.Å <sup>-3</sup>                                           |          |

Table 2. Atomic coordinates ( $\times 10^4$ ) and equivalent isotropic displacement parameters ( $\text{\AA}^2 \times 10^3$ ) for 007a-21048.  $U(\text{eq})$  is defined as one third of the trace of the orthogonalized  $U^{ij}$  tensor.

|       | x       | y       | z       | $U(\text{eq})$ |
|-------|---------|---------|---------|----------------|
| F(1)  | 6272(3) | 3730(3) | 5794(1) | 47(1)          |
| F(2)  | 7136(4) | 5385(3) | 5406(2) | 71(1)          |
| F(3)  | 8148(3) | 3675(3) | 5174(2) | 62(1)          |
| O(1)  | 3971(4) | 5403(3) | 6141(2) | 34(1)          |
| O(2)  | 457(4)  | 6946(3) | 7002(2) | 38(1)          |
| O(3)  | 1789(4) | 4510(3) | 5202(2) | 34(1)          |
| O(4)  | 6507(5) | 3868(5) | 4113(2) | 77(2)          |
| N(1)  | 1718(4) | 4908(3) | 6527(2) | 28(1)          |
| N(2)  | 1368(4) | 3519(4) | 7402(2) | 33(1)          |
| N(3)  | 4504(5) | 4281(4) | 4753(2) | 38(1)          |
| C(1)  | 1084(5) | 5770(4) | 6076(2) | 30(1)          |
| C(2)  | 1150(5) | 5594(4) | 5398(2) | 31(1)          |
| C(3)  | 616(6)  | 6457(4) | 4965(2) | 36(1)          |
| C(4)  | -14(6)  | 7500(5) | 5228(2) | 38(1)          |
| C(5)  | -104(6) | 7686(4) | 5901(2) | 37(1)          |
| C(6)  | 463(5)  | 6828(4) | 6334(2) | 31(1)          |
| C(7)  | 842(5)  | 4207(4) | 6938(2) | 32(1)          |
| C(8)  | 3232(5) | 4857(4) | 6552(2) | 32(1)          |
| C(9)  | 3820(5) | 4150(4) | 7108(2) | 32(1)          |
| C(10) | 5309(5) | 4181(5) | 7250(2) | 38(1)          |
| C(11) | 5822(6) | 3551(5) | 7785(2) | 42(1)          |
| C(12) | 4883(6) | 2852(5) | 8170(3) | 39(1)          |
| C(13) | 3423(6) | 2826(4) | 8037(3) | 39(1)          |
| C(14) | 2855(5) | 3504(4) | 7504(2) | 32(1)          |
| C(15) | -747(5) | 4265(5) | 6829(3) | 40(1)          |
| C(16) | 1935(6) | 4276(4) | 4526(2) | 34(1)          |
| C(17) | 745(6)  | 4095(4) | 4122(2) | 35(1)          |
| C(18) | 961(6)  | 3813(4) | 3459(3) | 40(1)          |
| C(19) | 2359(6) | 3730(5) | 3217(3) | 40(1)          |
| C(20) | 3567(6) | 3892(4) | 3619(3) | 38(1)          |
| C(21) | 3358(6) | 4153(4) | 4289(2) | 35(1)          |

|       |         |         |         |       |
|-------|---------|---------|---------|-------|
| C(22) | 5934(6) | 4099(5) | 4635(3) | 48(1) |
| C(23) | 6867(6) | 4215(5) | 5258(3) | 45(1) |

---

Table 3. Bond lengths [ $\text{\AA}$ ] and angles [ $^\circ$ ] for 007a-21048.

---

|             |          |
|-------------|----------|
| F(1)-C(23)  | 1.323(6) |
| F(2)-C(23)  | 1.346(7) |
| F(3)-C(23)  | 1.329(6) |
| O(1)-C(8)   | 1.228(5) |
| O(2)-C(6)   | 1.353(5) |
| O(2)-H(2)   | 0.8400   |
| O(3)-C(2)   | 1.389(5) |
| O(3)-C(16)  | 1.392(5) |
| O(4)-C(22)  | 1.203(7) |
| N(1)-C(7)   | 1.389(6) |
| N(1)-C(8)   | 1.393(6) |
| N(1)-C(1)   | 1.438(6) |
| N(2)-C(7)   | 1.296(6) |
| N(2)-C(14)  | 1.381(6) |
| N(3)-C(22)  | 1.349(7) |
| N(3)-C(21)  | 1.414(7) |
| N(3)-H(3)   | 0.8800   |
| C(1)-C(2)   | 1.381(6) |
| C(1)-C(6)   | 1.398(6) |
| C(2)-C(3)   | 1.381(7) |
| C(3)-C(4)   | 1.392(7) |
| C(3)-H(3A)  | 0.9500   |
| C(4)-C(5)   | 1.373(7) |
| C(4)-H(4)   | 0.9500   |
| C(5)-C(6)   | 1.388(7) |
| C(5)-H(5)   | 0.9500   |
| C(7)-C(15)  | 1.477(7) |
| C(8)-C(9)   | 1.466(6) |
| C(9)-C(14)  | 1.390(7) |
| C(9)-C(10)  | 1.397(7) |
| C(10)-C(11) | 1.366(7) |
| C(10)-H(10) | 0.9500   |
| C(11)-C(12) | 1.392(8) |
| C(11)-H(11) | 0.9500   |

|                  |          |
|------------------|----------|
| C(12)-C(13)      | 1.367(8) |
| C(12)-H(12)      | 0.9500   |
| C(13)-C(14)      | 1.408(7) |
| C(13)-H(13)      | 0.9500   |
| C(15)-H(15A)     | 0.9800   |
| C(15)-H(15B)     | 0.9800   |
| C(15)-H(15C)     | 0.9800   |
| C(16)-C(17)      | 1.376(7) |
| C(16)-C(21)      | 1.398(7) |
| C(17)-C(18)      | 1.388(7) |
| C(17)-H(17)      | 0.9500   |
| C(18)-C(19)      | 1.376(7) |
| C(18)-H(18)      | 0.9500   |
| C(19)-C(20)      | 1.386(7) |
| C(19)-H(19)      | 0.9500   |
| C(20)-C(21)      | 1.394(7) |
| C(20)-H(20)      | 0.9500   |
| C(22)-C(23)      | 1.525(8) |
|                  |          |
| C(6)-O(2)-H(2)   | 109.5    |
| C(2)-O(3)-C(16)  | 118.6(4) |
| C(7)-N(1)-C(8)   | 122.3(4) |
| C(7)-N(1)-C(1)   | 120.7(4) |
| C(8)-N(1)-C(1)   | 117.0(4) |
| C(7)-N(2)-C(14)  | 118.9(4) |
| C(22)-N(3)-C(21) | 126.4(4) |
| C(22)-N(3)-H(3)  | 116.8    |
| C(21)-N(3)-H(3)  | 116.8    |
| C(2)-C(1)-C(6)   | 120.1(4) |
| C(2)-C(1)-N(1)   | 121.1(4) |
| C(6)-C(1)-N(1)   | 118.8(4) |
| C(3)-C(2)-C(1)   | 120.9(4) |
| C(3)-C(2)-O(3)   | 124.2(4) |
| C(1)-C(2)-O(3)   | 114.9(4) |
| C(2)-C(3)-C(4)   | 118.3(4) |
| C(2)-C(3)-H(3A)  | 120.8    |

|                   |          |
|-------------------|----------|
| C(4)-C(3)-H(3A)   | 120.8    |
| C(5)-C(4)-C(3)    | 121.7(5) |
| C(5)-C(4)-H(4)    | 119.2    |
| C(3)-C(4)-H(4)    | 119.2    |
| C(4)-C(5)-C(6)    | 119.8(5) |
| C(4)-C(5)-H(5)    | 120.1    |
| C(6)-C(5)-H(5)    | 120.1    |
| O(2)-C(6)-C(5)    | 124.0(4) |
| O(2)-C(6)-C(1)    | 116.9(4) |
| C(5)-C(6)-C(1)    | 119.2(4) |
| N(2)-C(7)-N(1)    | 122.6(4) |
| N(2)-C(7)-C(15)   | 120.1(4) |
| N(1)-C(7)-C(15)   | 117.3(4) |
| O(1)-C(8)-N(1)    | 120.5(4) |
| O(1)-C(8)-C(9)    | 124.8(4) |
| N(1)-C(8)-C(9)    | 114.7(4) |
| C(14)-C(9)-C(10)  | 121.2(4) |
| C(14)-C(9)-C(8)   | 118.4(4) |
| C(10)-C(9)-C(8)   | 120.3(4) |
| C(11)-C(10)-C(9)  | 119.2(5) |
| C(11)-C(10)-H(10) | 120.4    |
| C(9)-C(10)-H(10)  | 120.4    |
| C(10)-C(11)-C(12) | 120.5(5) |
| C(10)-C(11)-H(11) | 119.8    |
| C(12)-C(11)-H(11) | 119.8    |
| C(13)-C(12)-C(11) | 120.6(5) |
| C(13)-C(12)-H(12) | 119.7    |
| C(11)-C(12)-H(12) | 119.7    |
| C(12)-C(13)-C(14) | 120.2(5) |
| C(12)-C(13)-H(13) | 119.9    |
| C(14)-C(13)-H(13) | 119.9    |
| N(2)-C(14)-C(9)   | 122.6(4) |
| N(2)-C(14)-C(13)  | 119.1(4) |
| C(9)-C(14)-C(13)  | 118.2(4) |
| C(7)-C(15)-H(15A) | 109.5    |
| C(7)-C(15)-H(15B) | 109.5    |

|                     |          |
|---------------------|----------|
| H(15A)-C(15)-H(15B) | 109.5    |
| C(7)-C(15)-H(15C)   | 109.5    |
| H(15A)-C(15)-H(15C) | 109.5    |
| H(15B)-C(15)-H(15C) | 109.5    |
| C(17)-C(16)-O(3)    | 121.8(4) |
| C(17)-C(16)-C(21)   | 121.8(4) |
| O(3)-C(16)-C(21)    | 116.2(4) |
| C(16)-C(17)-C(18)   | 119.2(5) |
| C(16)-C(17)-H(17)   | 120.4    |
| C(18)-C(17)-H(17)   | 120.4    |
| C(19)-C(18)-C(17)   | 119.3(5) |
| C(19)-C(18)-H(18)   | 120.3    |
| C(17)-C(18)-H(18)   | 120.3    |
| C(18)-C(19)-C(20)   | 122.1(5) |
| C(18)-C(19)-H(19)   | 119.0    |
| C(20)-C(19)-H(19)   | 119.0    |
| C(19)-C(20)-C(21)   | 118.9(5) |
| C(19)-C(20)-H(20)   | 120.6    |
| C(21)-C(20)-H(20)   | 120.6    |
| C(20)-C(21)-C(16)   | 118.6(5) |
| C(20)-C(21)-N(3)    | 123.9(5) |
| C(16)-C(21)-N(3)    | 117.5(4) |
| O(4)-C(22)-N(3)     | 127.6(5) |
| O(4)-C(22)-C(23)    | 119.5(5) |
| N(3)-C(22)-C(23)    | 112.9(5) |
| F(1)-C(23)-F(3)     | 106.9(4) |
| F(1)-C(23)-F(2)     | 106.4(5) |
| F(3)-C(23)-F(2)     | 107.1(5) |
| F(1)-C(23)-C(22)    | 114.0(4) |
| F(3)-C(23)-C(22)    | 110.7(5) |
| F(2)-C(23)-C(22)    | 111.4(5) |

---

Symmetry transformations used to generate equivalent atoms:



Table 4. Anisotropic displacement parameters ( $\text{\AA}^2 \times 10^3$ ) for 007a-21048. The anisotropic displacement factor exponent takes the form:  $-2\pi^2 [ h^2 a^{*2} U^{11} + \dots + 2 h k a^* b^* U^{12} ]$

|       | U <sup>11</sup> | U <sup>22</sup> | U <sup>33</sup> | U <sup>23</sup> | U <sup>13</sup> | U <sup>12</sup> |
|-------|-----------------|-----------------|-----------------|-----------------|-----------------|-----------------|
| F(1)  | 42(2)           | 54(2)           | 47(2)           | 3(1)            | 4(1)            | 3(1)            |
| F(2)  | 68(2)           | 50(2)           | 94(3)           | 11(2)           | -25(2)          | -13(2)          |
| F(3)  | 34(2)           | 94(3)           | 58(2)           | 14(2)           | 5(2)            | 12(2)           |
| O(1)  | 33(2)           | 32(2)           | 38(2)           | 1(1)            | 4(2)            | -2(2)           |
| O(2)  | 40(2)           | 39(2)           | 35(2)           | -4(2)           | -2(2)           | 10(2)           |
| O(3)  | 41(2)           | 28(2)           | 34(2)           | -5(1)           | 3(2)            | 7(2)            |
| O(4)  | 43(2)           | 140(5)          | 49(3)           | -3(3)           | 9(2)            | 15(3)           |
| N(1)  | 25(2)           | 29(2)           | 32(2)           | 5(2)            | 0(2)            | 1(2)            |
| N(2)  | 32(2)           | 30(2)           | 37(2)           | 2(2)            | -1(2)           | -2(2)           |
| N(3)  | 34(2)           | 40(2)           | 38(2)           | -1(2)           | 3(2)            | 0(2)            |
| C(1)  | 30(3)           | 27(2)           | 32(2)           | 2(2)            | -2(2)           | 1(2)            |
| C(2)  | 31(3)           | 27(2)           | 36(2)           | -6(2)           | 2(2)            | 3(2)            |
| C(3)  | 42(3)           | 33(3)           | 34(2)           | 5(2)            | 1(2)            | 4(2)            |
| C(4)  | 40(3)           | 35(3)           | 39(3)           | 5(2)            | 1(2)            | 5(2)            |
| C(5)  | 42(3)           | 30(3)           | 40(3)           | -3(2)           | 1(2)            | 5(2)            |
| C(6)  | 31(3)           | 30(2)           | 31(2)           | -1(2)           | 0(2)            | 2(2)            |
| C(7)  | 37(3)           | 26(2)           | 32(2)           | 0(2)            | 0(2)            | -3(2)           |
| C(8)  | 35(3)           | 27(2)           | 35(3)           | -4(2)           | 0(2)            | 0(2)            |
| C(9)  | 30(3)           | 32(3)           | 36(3)           | -1(2)           | 0(2)            | 4(2)            |
| C(10) | 32(3)           | 38(3)           | 42(3)           | -6(2)           | 4(2)            | 2(2)            |
| C(11) | 38(3)           | 46(3)           | 43(3)           | -3(2)           | -4(2)           | 11(3)           |
| C(12) | 45(3)           | 34(3)           | 39(3)           | 0(2)            | -4(2)           | 12(2)           |
| C(13) | 43(3)           | 34(3)           | 39(3)           | 3(2)            | -1(2)           | 5(2)            |
| C(14) | 29(3)           | 28(2)           | 38(2)           | -4(2)           | 1(2)            | 4(2)            |
| C(15) | 30(3)           | 44(3)           | 46(3)           | 5(2)            | 1(2)            | -3(2)           |
| C(16) | 46(3)           | 28(2)           | 27(2)           | -1(2)           | 2(2)            | 4(2)            |
| C(17) | 36(3)           | 33(3)           | 37(3)           | 2(2)            | -2(2)           | -2(2)           |
| C(18) | 43(3)           | 37(3)           | 41(3)           | 2(2)            | -1(2)           | 0(2)            |
| C(19) | 48(3)           | 35(3)           | 39(3)           | 0(2)            | 5(2)            | 1(2)            |
| C(20) | 38(3)           | 33(3)           | 43(3)           | 2(2)            | 4(2)            | 1(2)            |
| C(21) | 38(3)           | 31(2)           | 36(3)           | -1(2)           | 1(2)            | -2(2)           |

|       |       |       |       |      |      |       |
|-------|-------|-------|-------|------|------|-------|
| C(22) | 39(3) | 58(4) | 48(3) | 8(3) | 2(3) | -1(3) |
| C(23) | 34(3) | 49(3) | 52(3) | 6(3) | 4(3) | 2(2)  |

---

Table 5. Hydrogen coordinates ( $\times 10^4$ ) and isotropic displacement parameters ( $\text{\AA}^2 \times 10^{-3}$ ) for 007a-21048.

|        | x     | y    | z    | U(eq) |
|--------|-------|------|------|-------|
| H(2)   | -267  | 7361 | 7118 | 57    |
| H(3)   | 4261  | 4502 | 5158 | 45    |
| H(3A)  | 677   | 6342 | 4498 | 44    |
| H(4)   | -392  | 8098 | 4936 | 46    |
| H(5)   | -553  | 8399 | 6069 | 45    |
| H(10)  | 5956  | 4634 | 6978 | 45    |
| H(11)  | 6826  | 3589 | 7895 | 51    |
| H(12)  | 5259  | 2389 | 8529 | 47    |
| H(13)  | 2792  | 2350 | 8304 | 47    |
| H(15A) | -1108 | 5066 | 6960 | 60    |
| H(15B) | -1228 | 3639 | 7096 | 60    |
| H(15C) | -958  | 4128 | 6358 | 60    |
| H(17)  | -212  | 4162 | 4297 | 43    |
| H(18)  | 153   | 3678 | 3174 | 48    |
| H(19)  | 2500  | 3557 | 2759 | 49    |
| H(20)  | 4522  | 3827 | 3441 | 46    |

Table 6. Torsion angles [°] for 007a-21048.

---

|                       |           |
|-----------------------|-----------|
| C(7)-N(1)-C(1)-C(2)   | -111.8(5) |
| C(8)-N(1)-C(1)-C(2)   | 71.1(6)   |
| C(7)-N(1)-C(1)-C(6)   | 71.5(6)   |
| C(8)-N(1)-C(1)-C(6)   | -105.6(5) |
| C(6)-C(1)-C(2)-C(3)   | 0.4(7)    |
| N(1)-C(1)-C(2)-C(3)   | -176.2(4) |
| C(6)-C(1)-C(2)-O(3)   | -179.9(4) |
| N(1)-C(1)-C(2)-O(3)   | 3.4(6)    |
| C(16)-O(3)-C(2)-C(3)  | 1.4(7)    |
| C(16)-O(3)-C(2)-C(1)  | -178.2(4) |
| C(1)-C(2)-C(3)-C(4)   | -1.1(7)   |
| O(3)-C(2)-C(3)-C(4)   | 179.3(4)  |
| C(2)-C(3)-C(4)-C(5)   | 0.4(8)    |
| C(3)-C(4)-C(5)-C(6)   | 1.0(8)    |
| C(4)-C(5)-C(6)-O(2)   | 178.3(5)  |
| C(4)-C(5)-C(6)-C(1)   | -1.7(7)   |
| C(2)-C(1)-C(6)-O(2)   | -179.0(4) |
| N(1)-C(1)-C(6)-O(2)   | -2.3(6)   |
| C(2)-C(1)-C(6)-C(5)   | 1.0(7)    |
| N(1)-C(1)-C(6)-C(5)   | 177.7(4)  |
| C(14)-N(2)-C(7)-N(1)  | 1.7(7)    |
| C(14)-N(2)-C(7)-C(15) | -178.4(4) |
| C(8)-N(1)-C(7)-N(2)   | 4.7(7)    |
| C(1)-N(1)-C(7)-N(2)   | -172.2(4) |
| C(8)-N(1)-C(7)-C(15)  | -175.2(4) |
| C(1)-N(1)-C(7)-C(15)  | 8.0(6)    |
| C(7)-N(1)-C(8)-O(1)   | 173.2(4)  |
| C(1)-N(1)-C(8)-O(1)   | -9.8(6)   |
| C(7)-N(1)-C(8)-C(9)   | -8.7(6)   |
| C(1)-N(1)-C(8)-C(9)   | 168.3(4)  |
| O(1)-C(8)-C(9)-C(14)  | -175.1(5) |
| N(1)-C(8)-C(9)-C(14)  | 6.8(6)    |
| O(1)-C(8)-C(9)-C(10)  | 8.0(7)    |
| N(1)-C(8)-C(9)-C(10)  | -170.1(4) |

|                         |           |
|-------------------------|-----------|
| C(14)-C(9)-C(10)-C(11)  | 0.8(7)    |
| C(8)-C(9)-C(10)-C(11)   | 177.6(4)  |
| C(9)-C(10)-C(11)-C(12)  | 2.2(7)    |
| C(10)-C(11)-C(12)-C(13) | -2.8(8)   |
| C(11)-C(12)-C(13)-C(14) | 0.3(8)    |
| C(7)-N(2)-C(14)-C(9)    | -3.4(7)   |
| C(7)-N(2)-C(14)-C(13)   | 175.5(4)  |
| C(10)-C(9)-C(14)-N(2)   | 175.7(5)  |
| C(8)-C(9)-C(14)-N(2)    | -1.1(7)   |
| C(10)-C(9)-C(14)-C(13)  | -3.2(7)   |
| C(8)-C(9)-C(14)-C(13)   | 180.0(4)  |
| C(12)-C(13)-C(14)-N(2)  | -176.3(5) |
| C(12)-C(13)-C(14)-C(9)  | 2.6(7)    |
| C(2)-O(3)-C(16)-C(17)   | -66.7(6)  |
| C(2)-O(3)-C(16)-C(21)   | 117.5(5)  |
| O(3)-C(16)-C(17)-C(18)  | -177.3(4) |
| C(21)-C(16)-C(17)-C(18) | -1.7(7)   |
| C(16)-C(17)-C(18)-C(19) | -0.5(7)   |
| C(17)-C(18)-C(19)-C(20) | 1.5(8)    |
| C(18)-C(19)-C(20)-C(21) | -0.3(8)   |
| C(19)-C(20)-C(21)-C(16) | -1.8(7)   |
| C(19)-C(20)-C(21)-N(3)  | 177.0(5)  |
| C(17)-C(16)-C(21)-C(20) | 2.9(7)    |
| O(3)-C(16)-C(21)-C(20)  | 178.7(4)  |
| C(17)-C(16)-C(21)-N(3)  | -176.0(4) |
| O(3)-C(16)-C(21)-N(3)   | -0.2(6)   |
| C(22)-N(3)-C(21)-C(20)  | -4.6(8)   |
| C(22)-N(3)-C(21)-C(16)  | 174.3(5)  |
| C(21)-N(3)-C(22)-O(4)   | 4.8(10)   |
| C(21)-N(3)-C(22)-C(23)  | -175.2(4) |
| O(4)-C(22)-C(23)-F(1)   | -139.9(6) |
| N(3)-C(22)-C(23)-F(1)   | 40.1(7)   |
| O(4)-C(22)-C(23)-F(3)   | -19.4(8)  |
| N(3)-C(22)-C(23)-F(3)   | 160.6(5)  |
| O(4)-C(22)-C(23)-F(2)   | 99.6(7)   |
| N(3)-C(22)-C(23)-F(2)   | -80.3(6)  |

---

Symmetry transformations used to generate equivalent atoms:

Table 7. Hydrogen bonds for 007a-21048 [ $\text{\AA}$  and  $^\circ$ ].

| D-H...A            | d(D-H) | d(H...A) | d(D...A) | $\angle(\text{DHA})$ |
|--------------------|--------|----------|----------|----------------------|
| O(2)-H(2)...N(2)#1 | 0.84   | 1.89     | 2.693(5) | 158.7                |
| N(3)-H(3)...O(1)   | 0.88   | 2.23     | 3.098(5) | 167.4                |

Symmetry transformations used to generate equivalent atoms:

#1  $-x, y+1/2, -z+3/2$

## References:

1. Diener, M. E.; Metrano, A. J.; Kusano, S.; Miller, S. J. Enantioselective Synthesis of 3 Arylquinazolin-4(3H)-ones via Peptide-Catalyzed Atroposelective Bromination. *J. Am. Chem. Soc.* **2015**, *137*, 12369-12377.
2. Schroeder, C. E.; Neuenswander, S. A.; Yao, T.; Aubé, J.; Golden, J. E. One-pot, regiospecific assembly of (E)-benzamidines from  $\delta$ - and  $\gamma$ -amino acids via an intramolecular aminoquinazolinone rearrangement. *Organic & Biomolecular Chemistry* **2016**, *14*, 3950-3955.



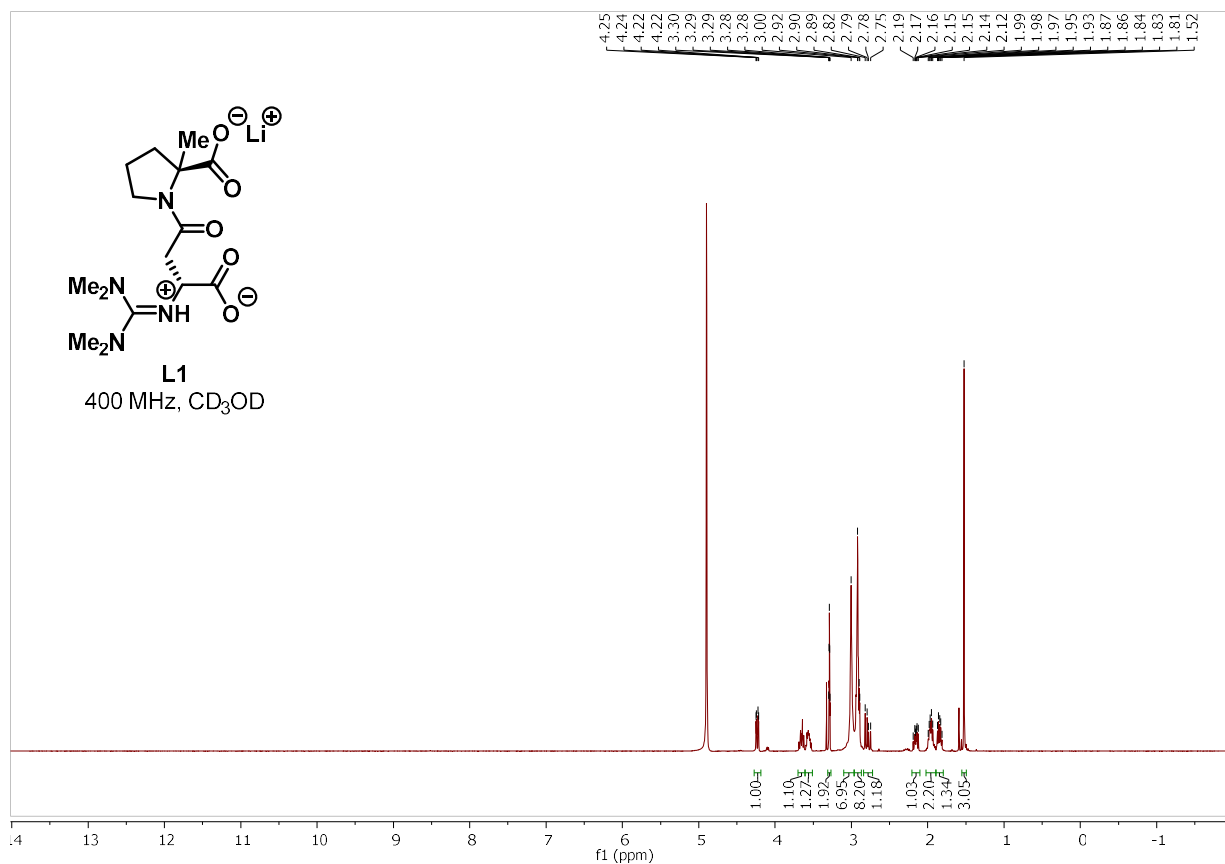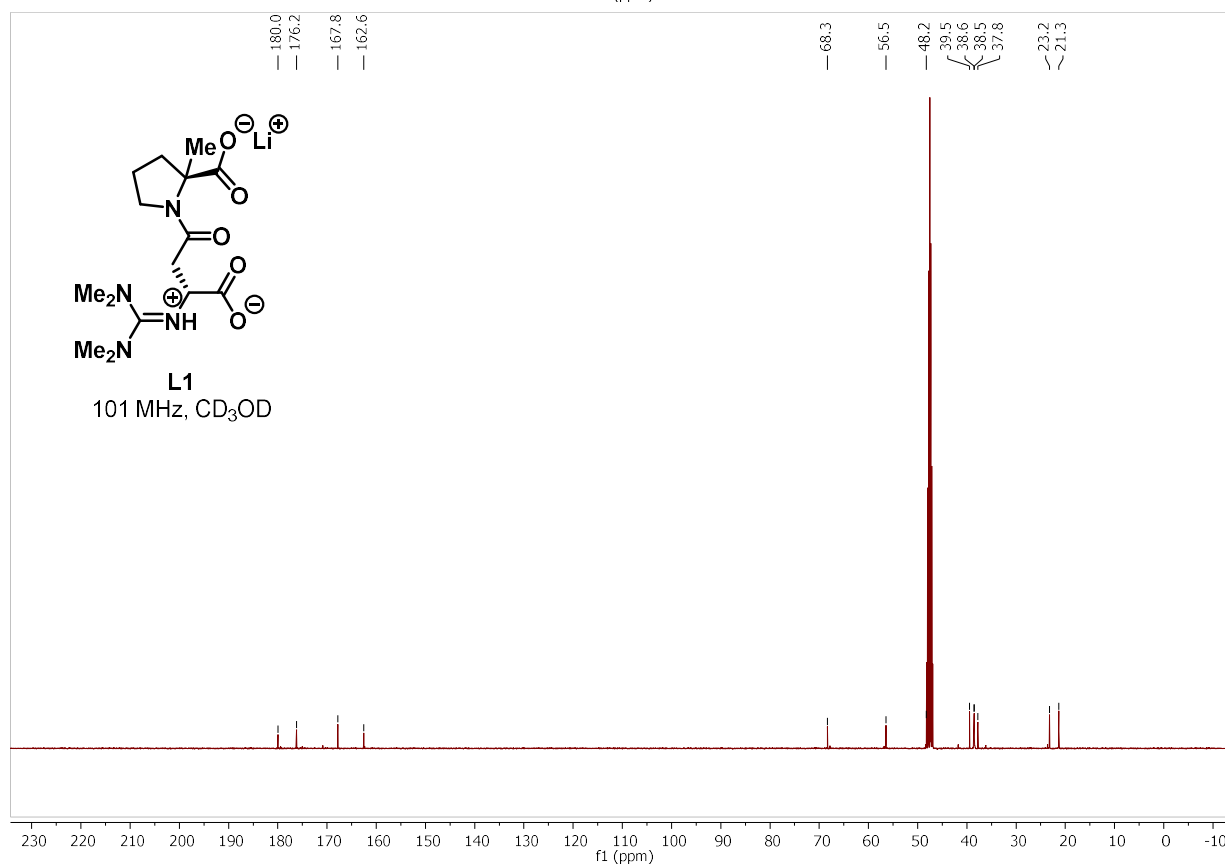

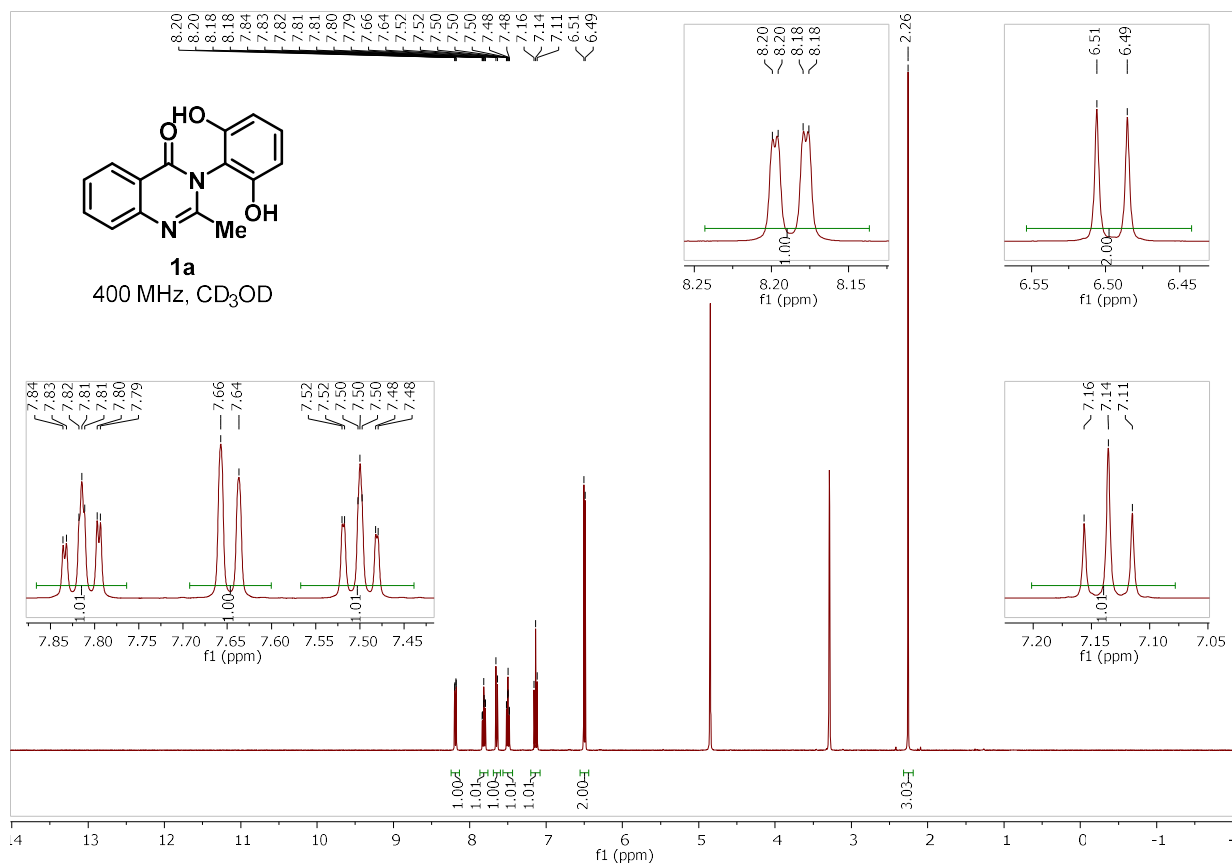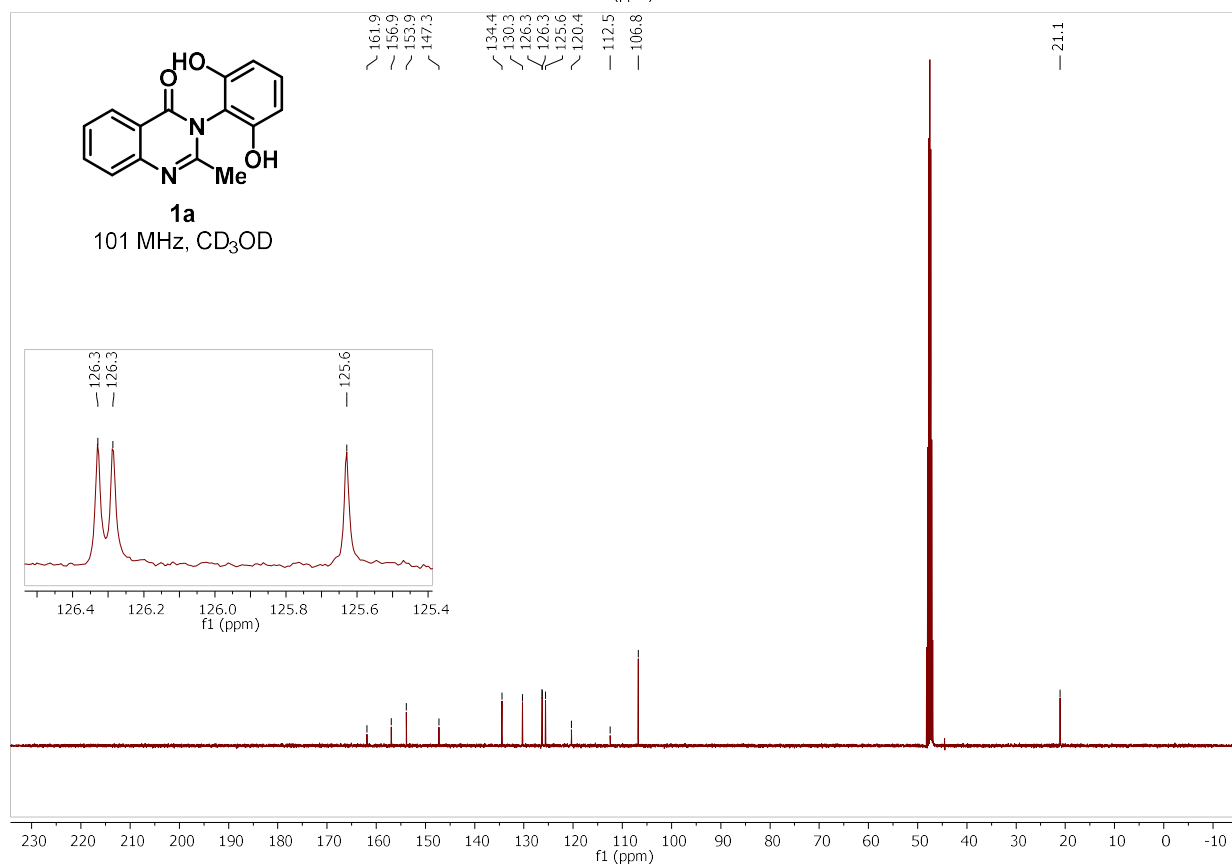

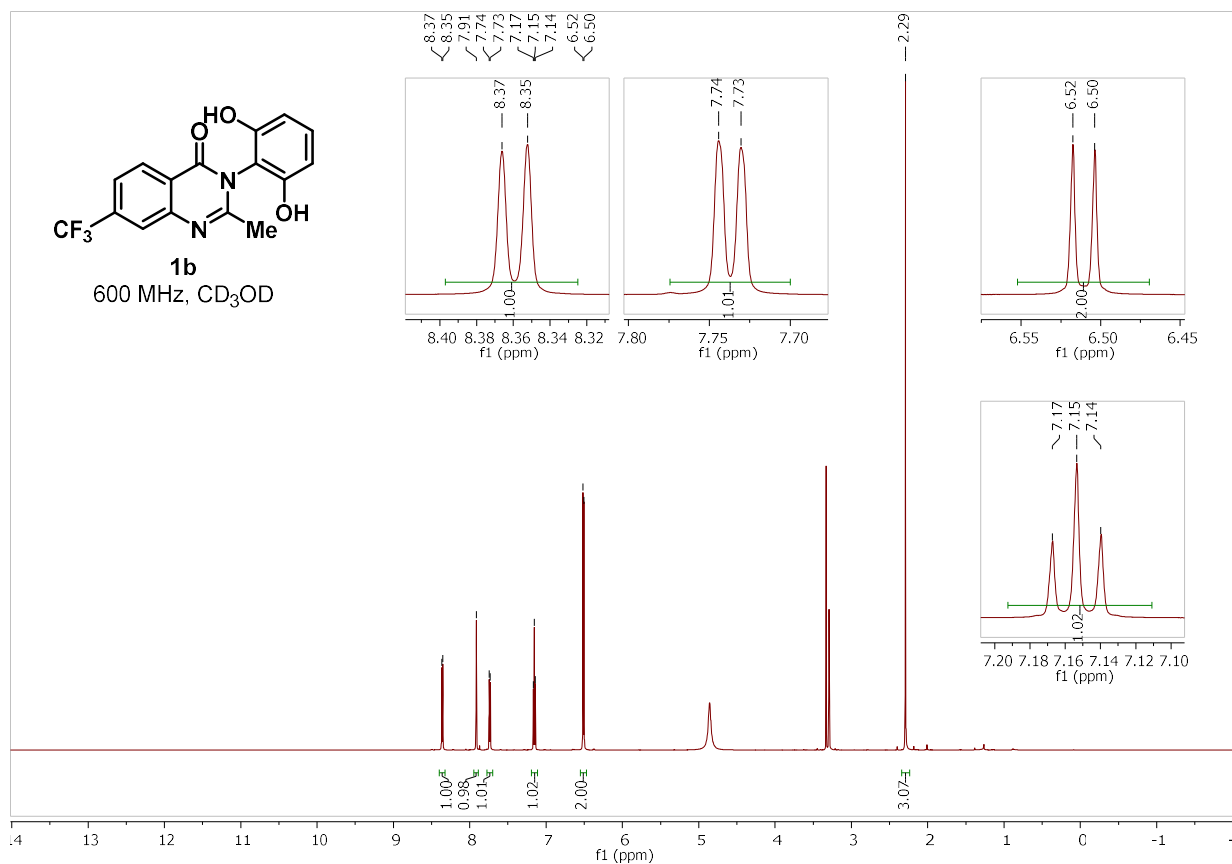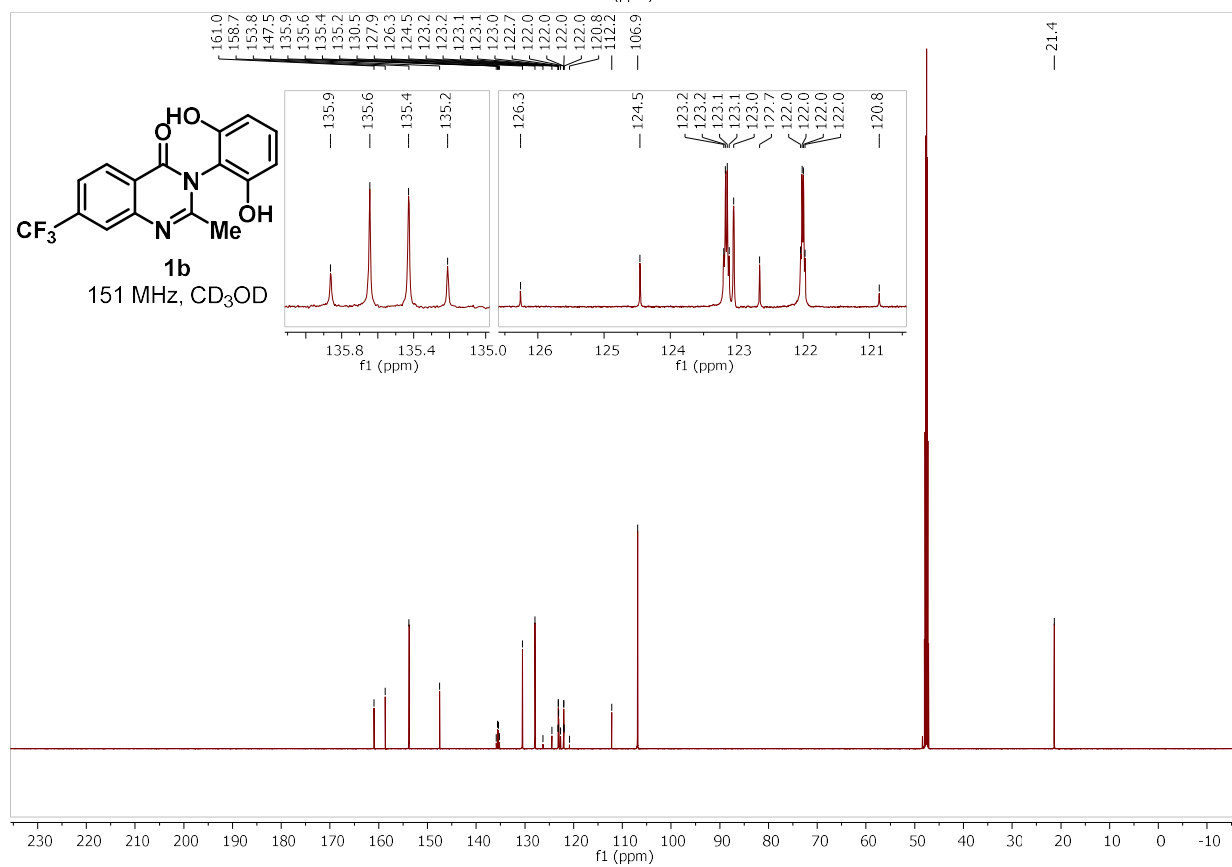

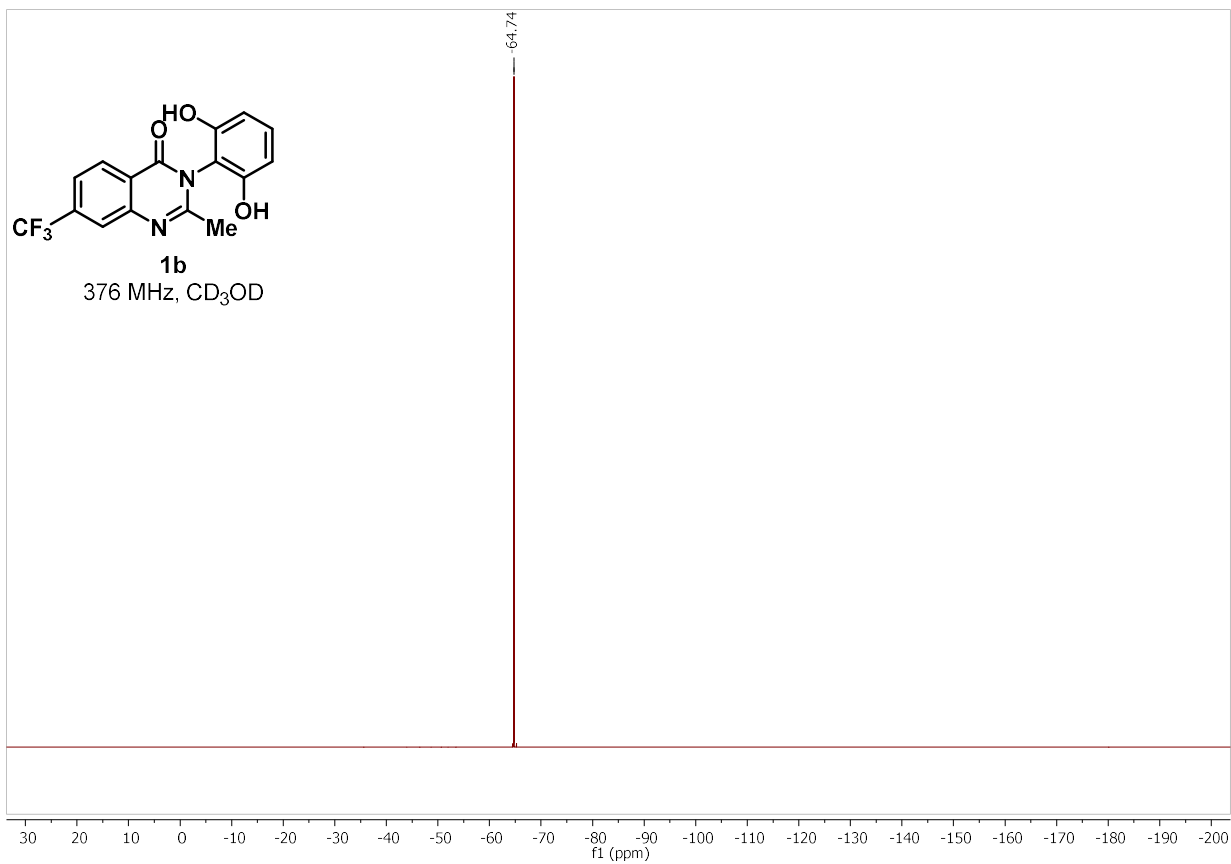

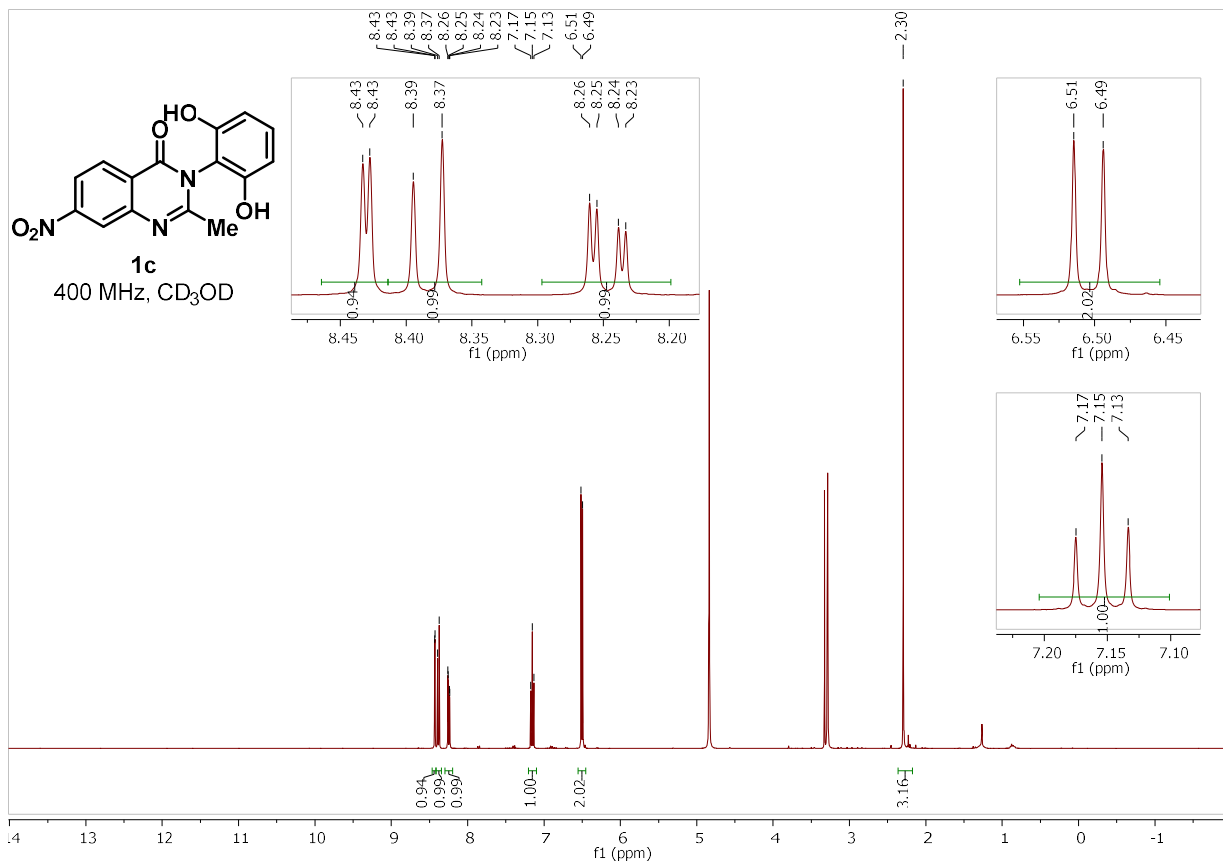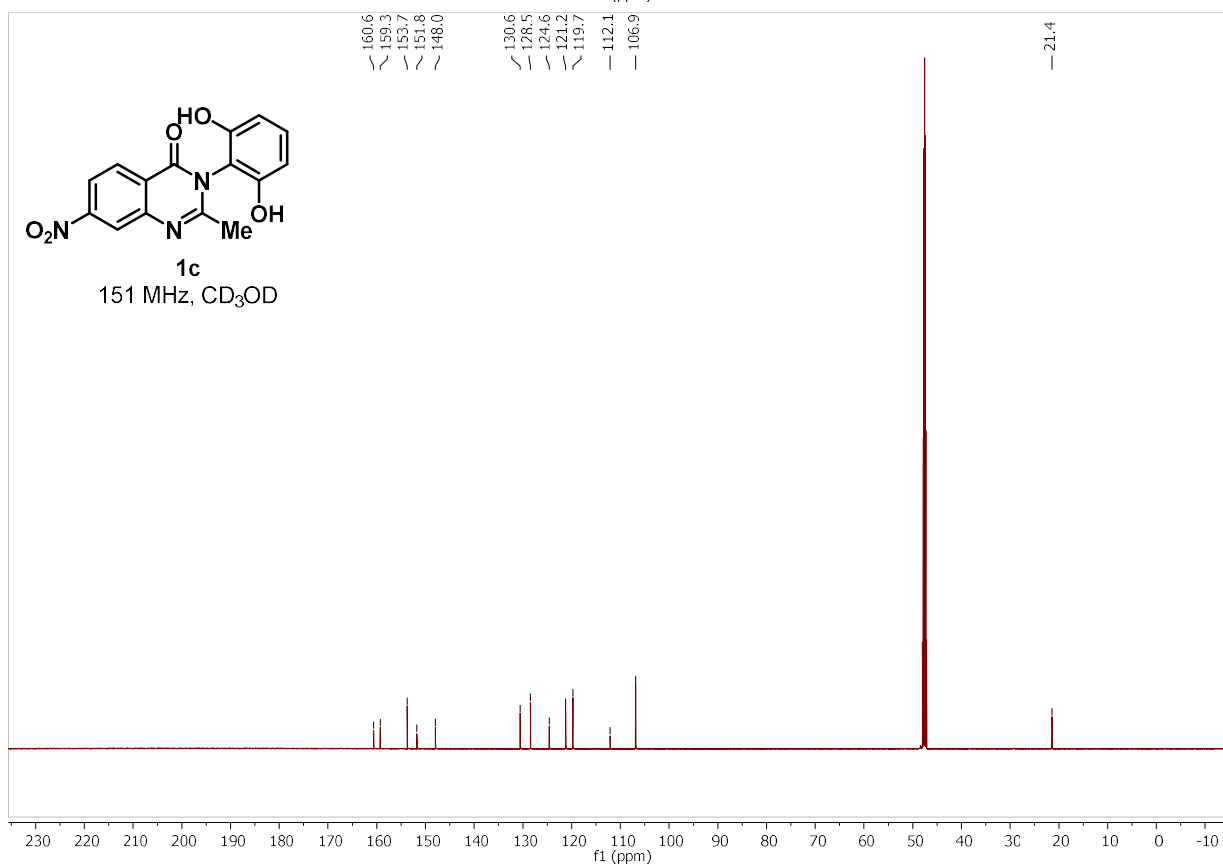

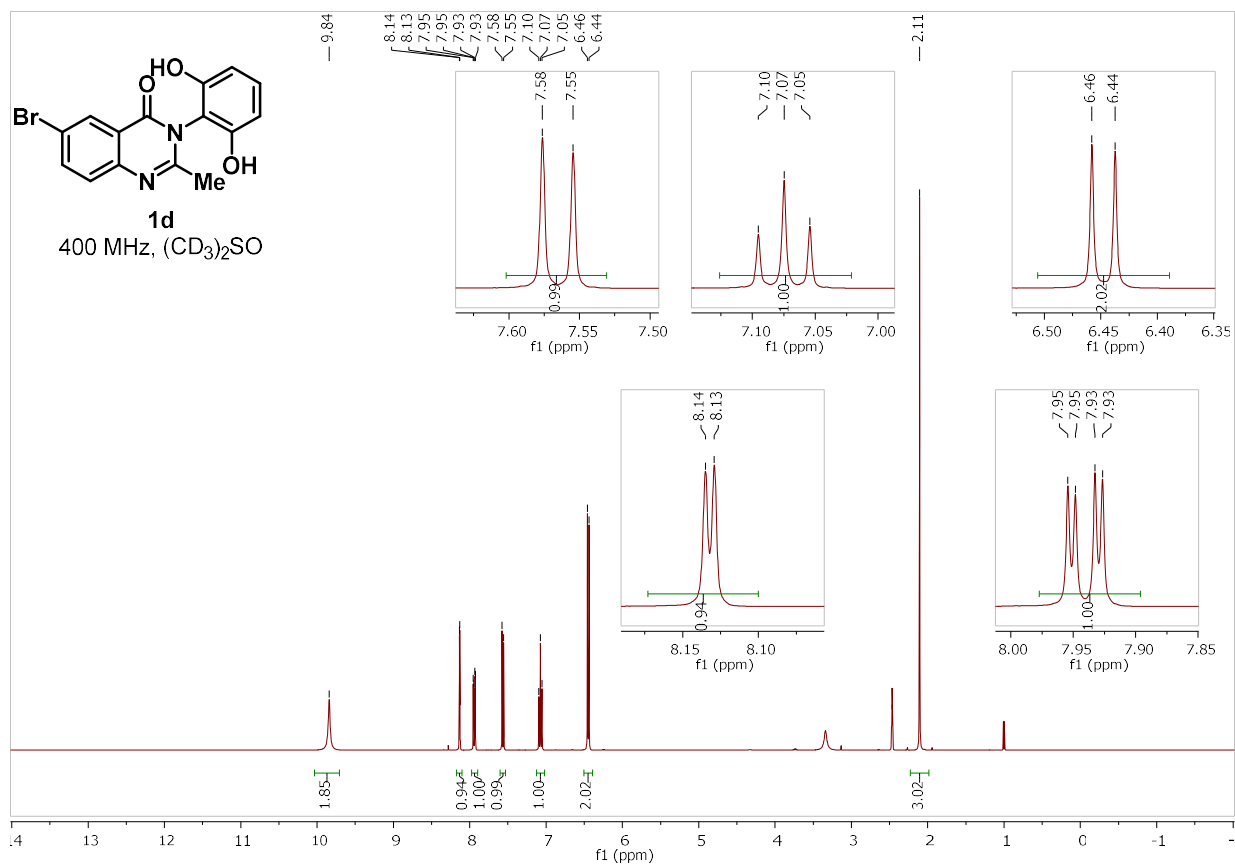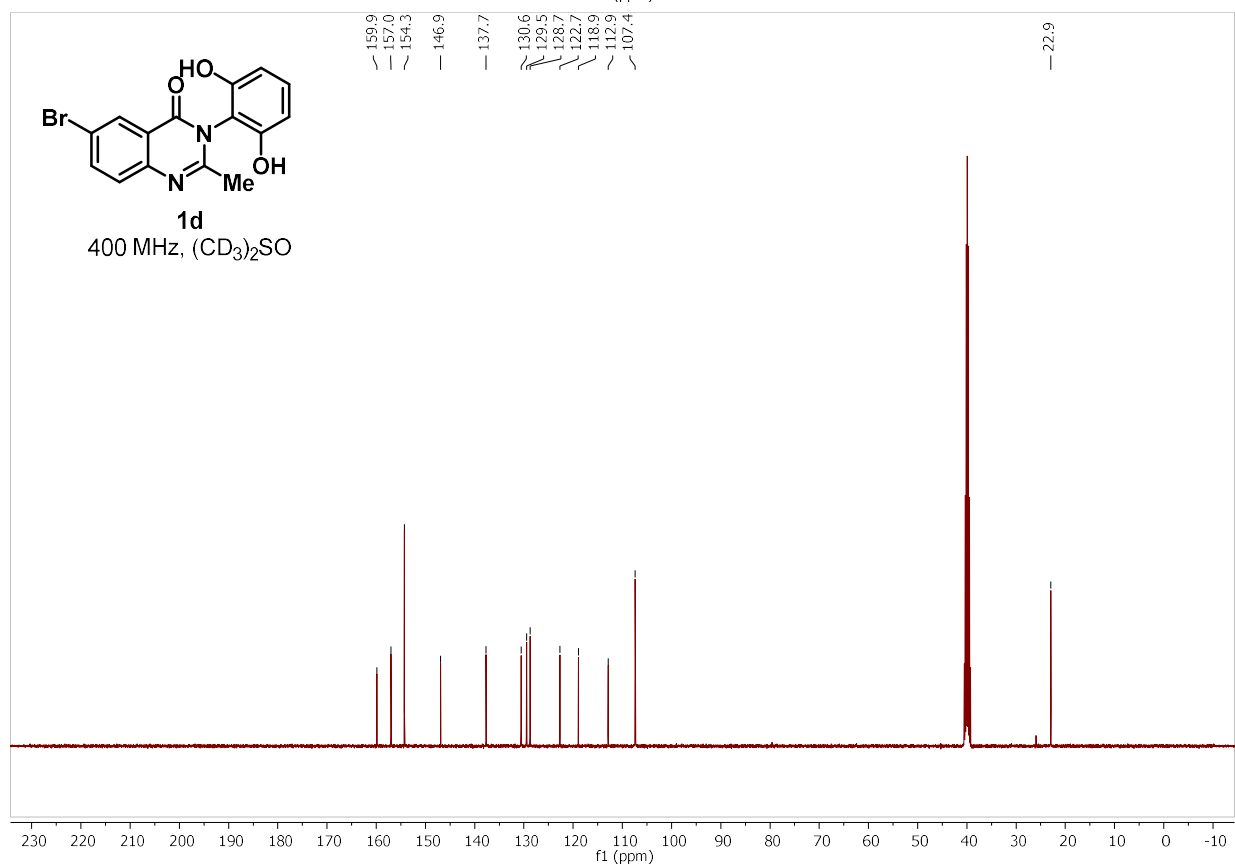

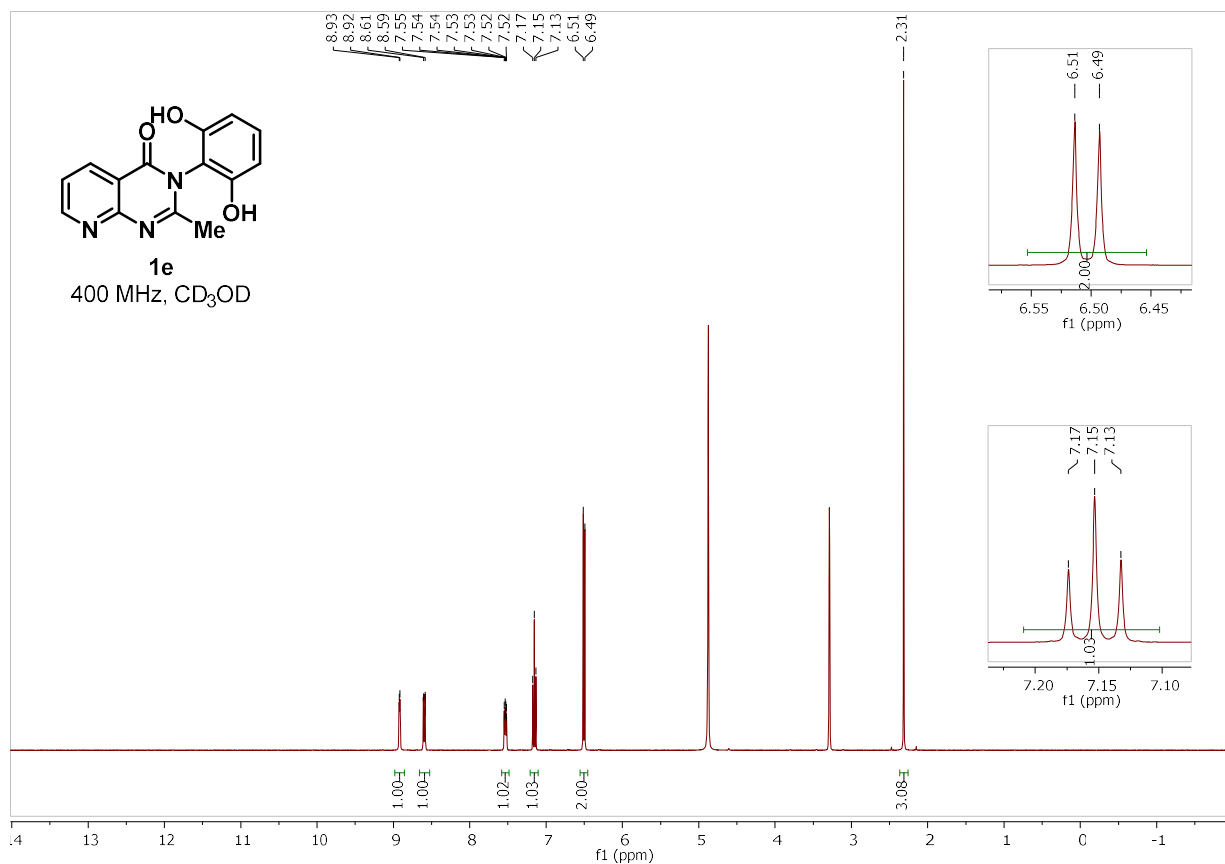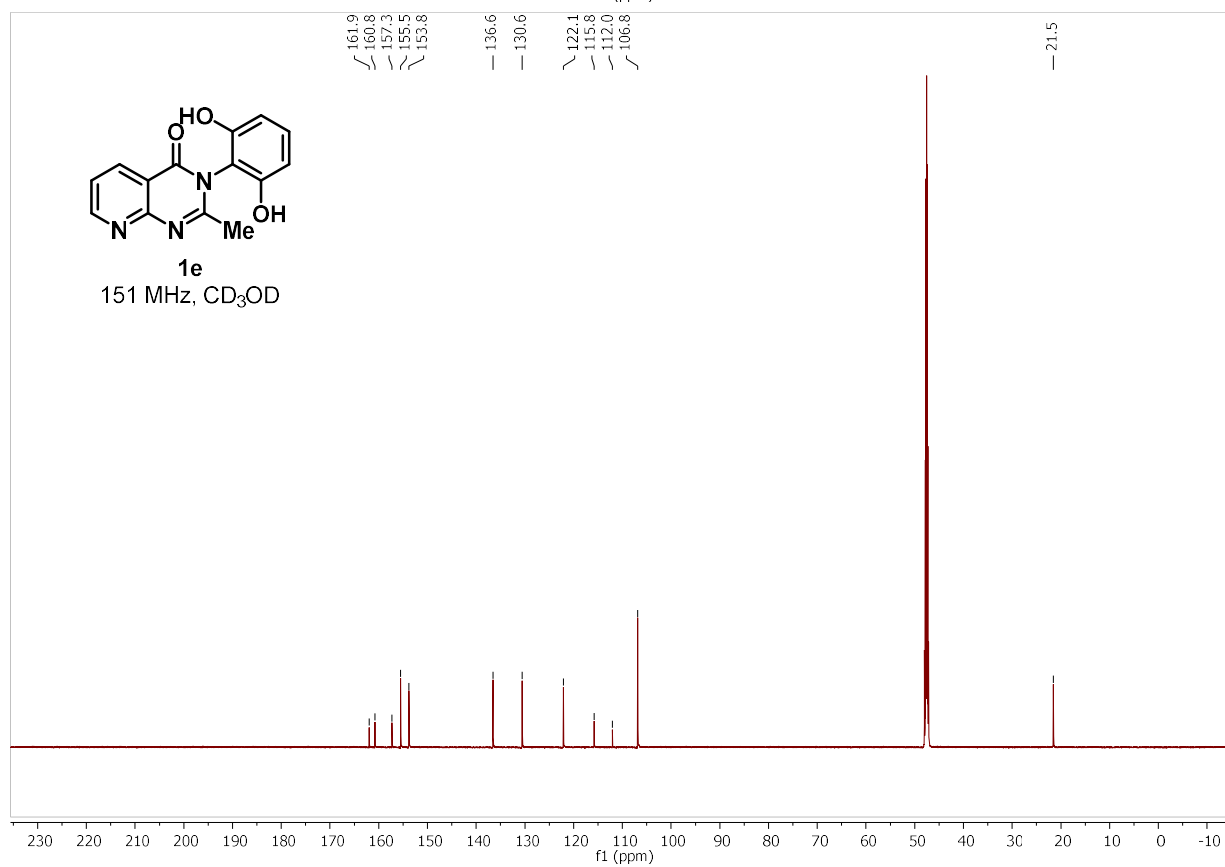

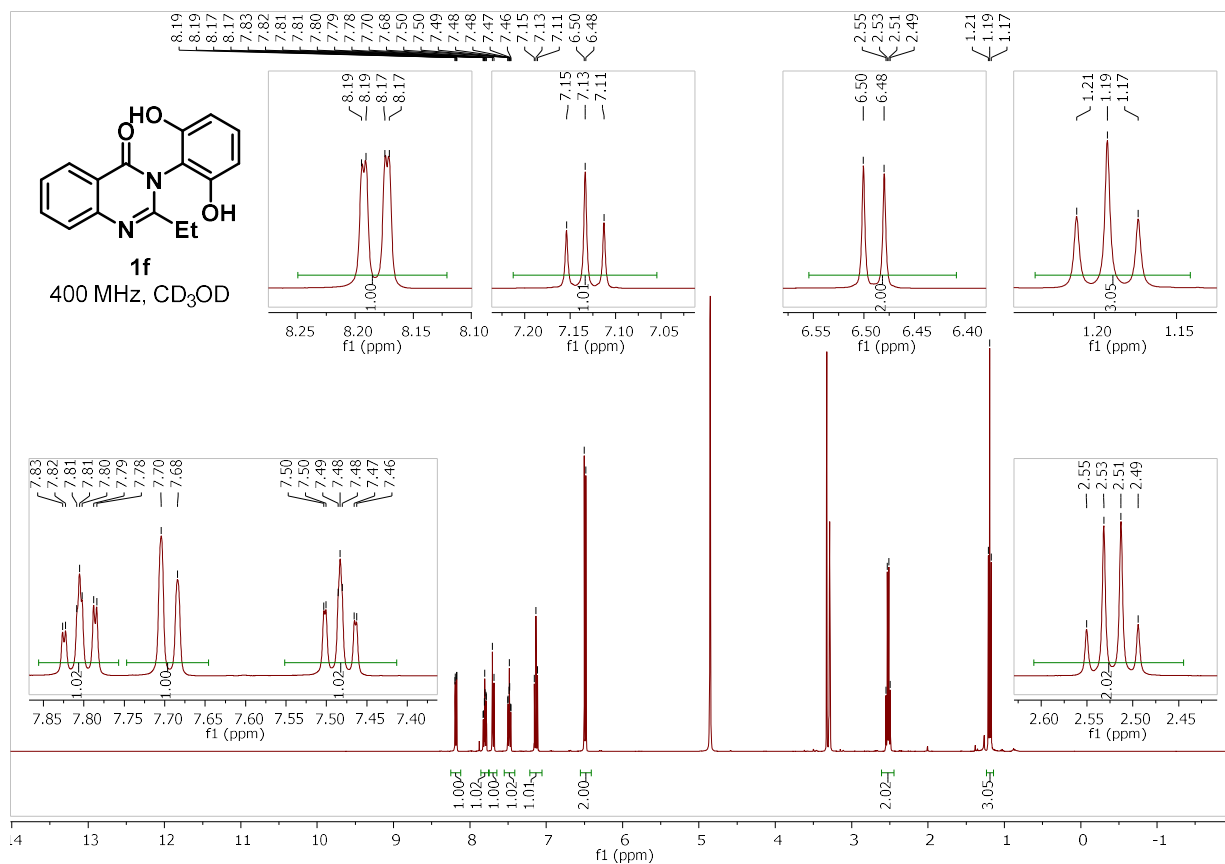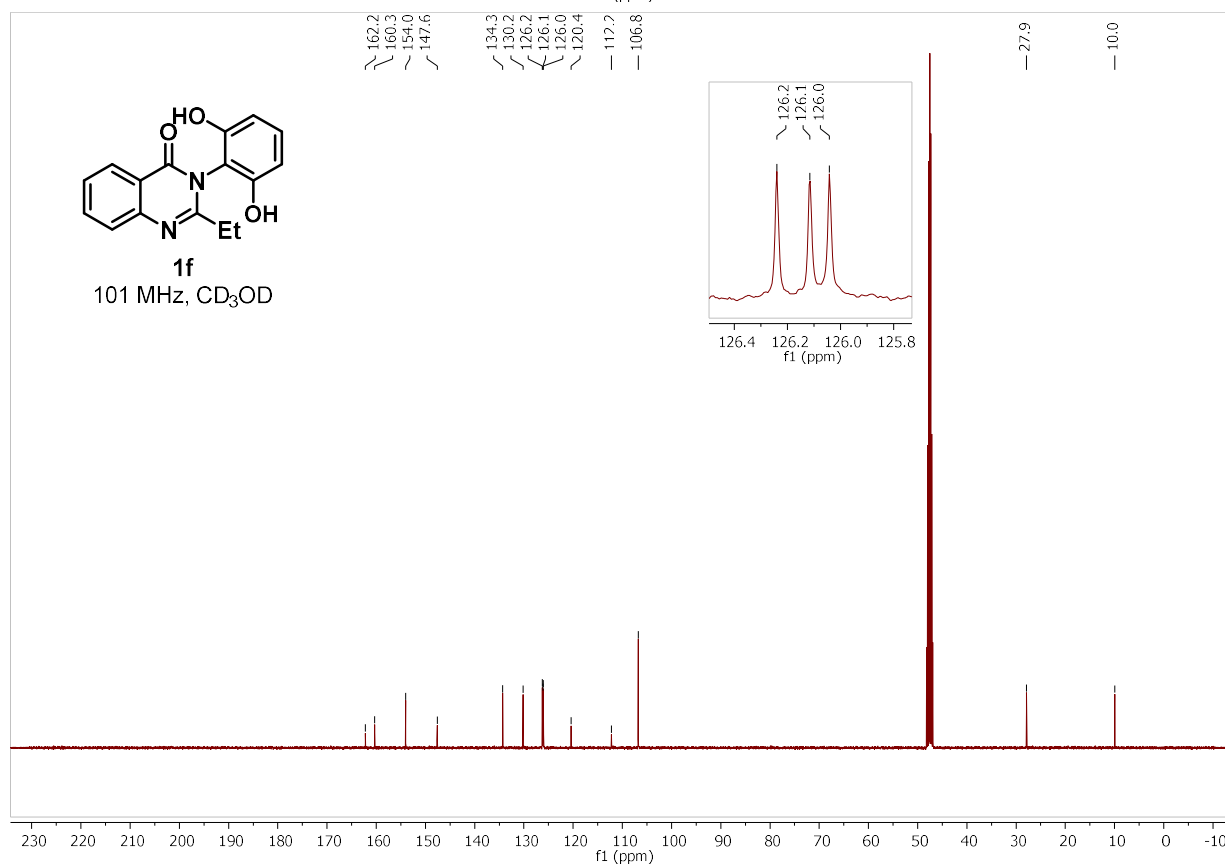



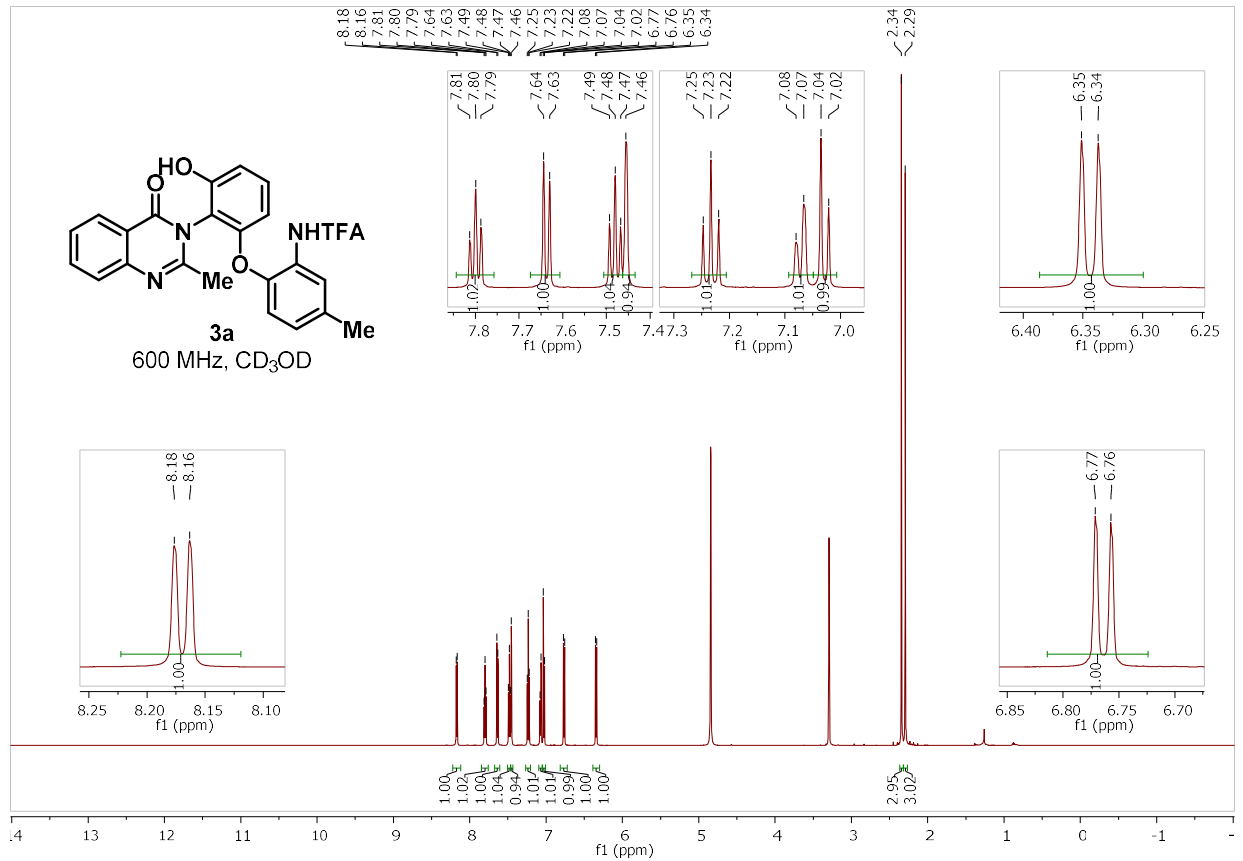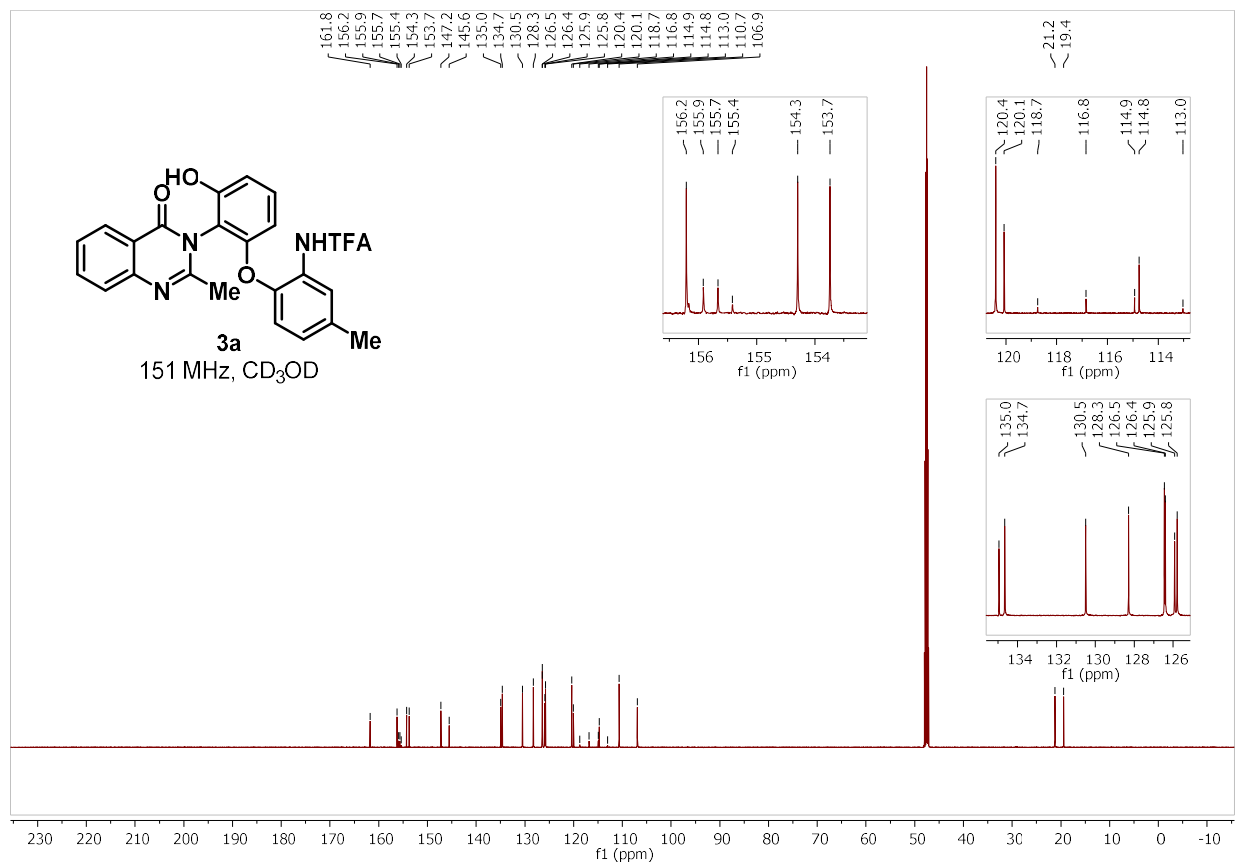

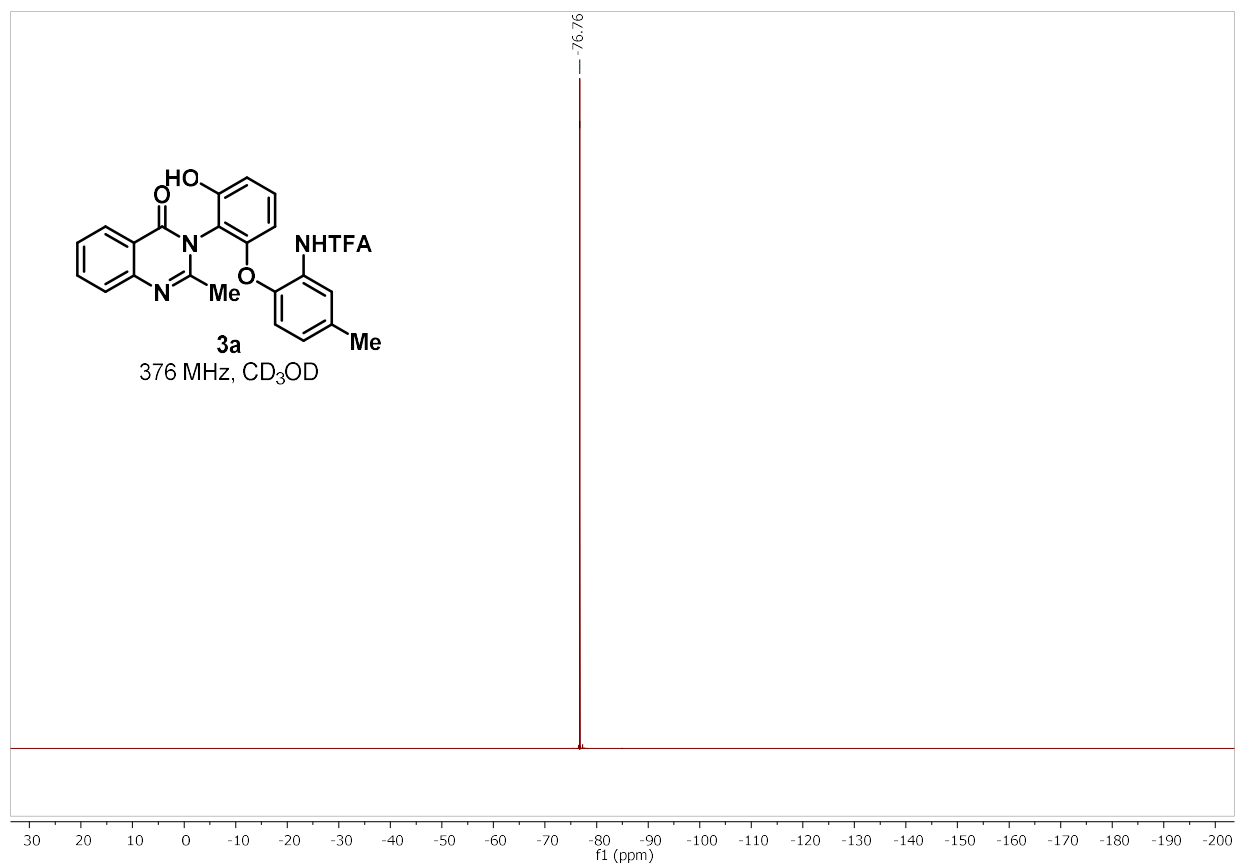

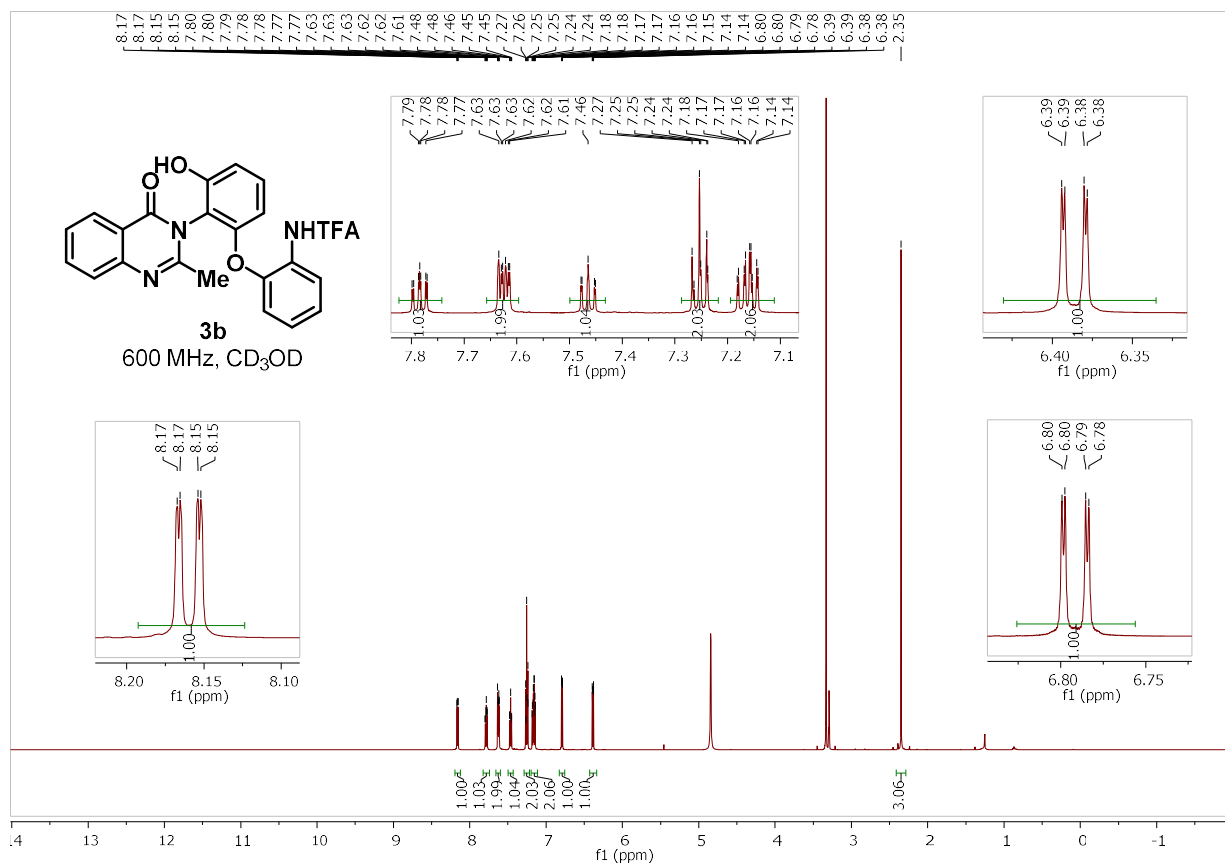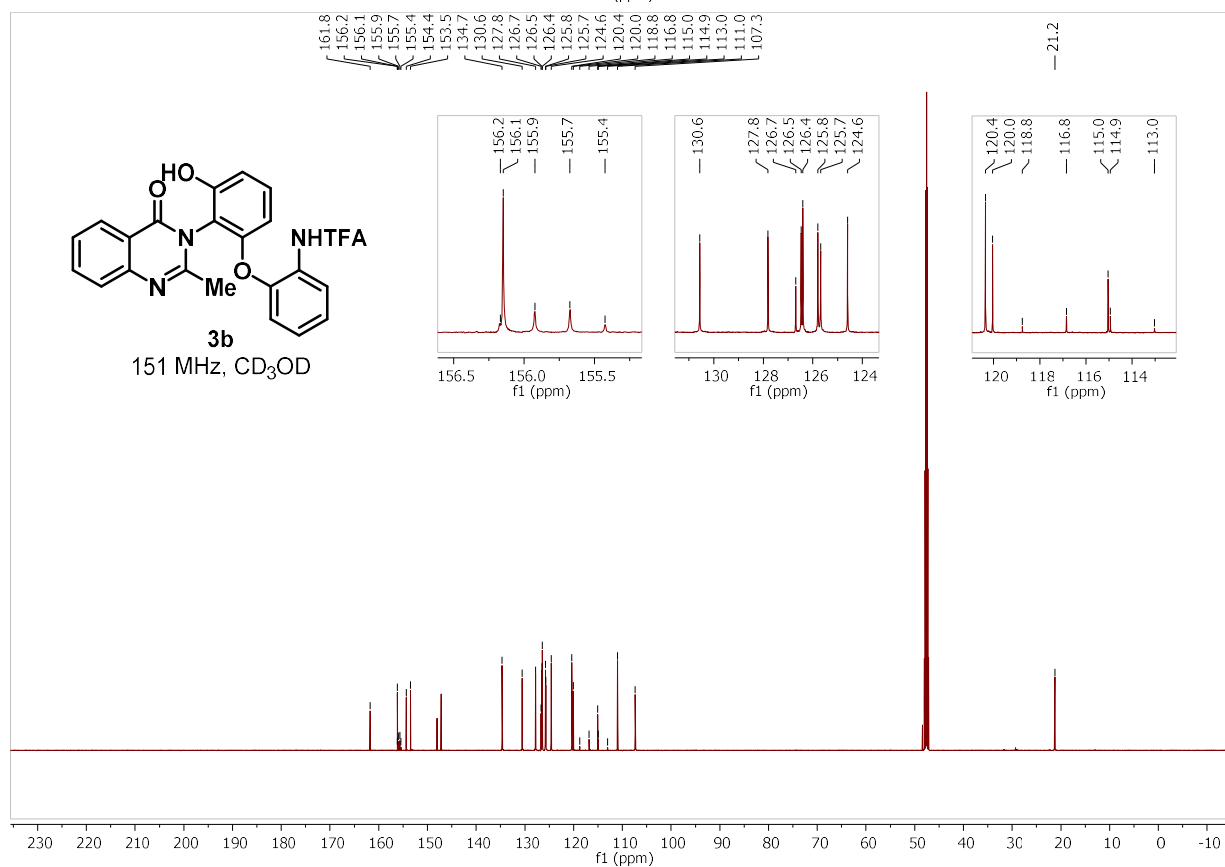

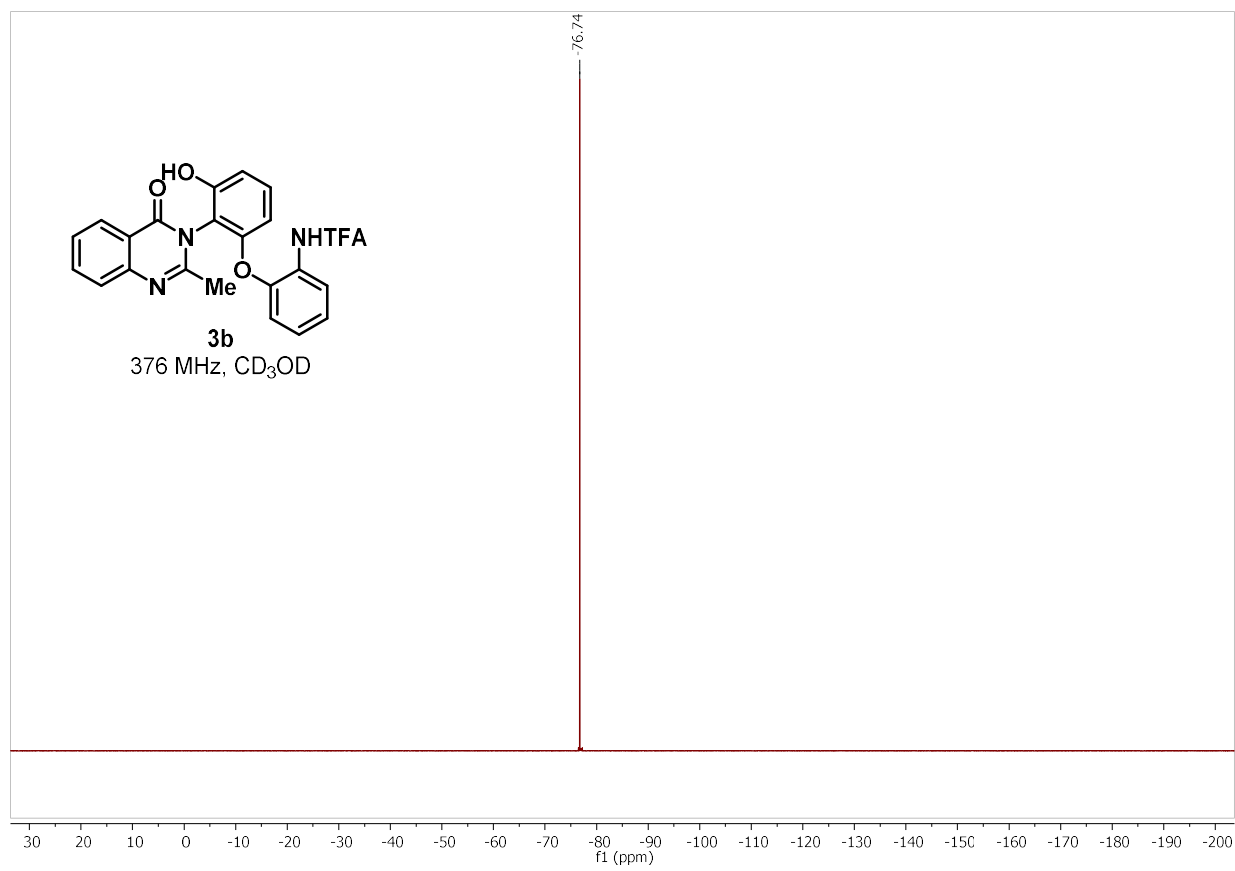

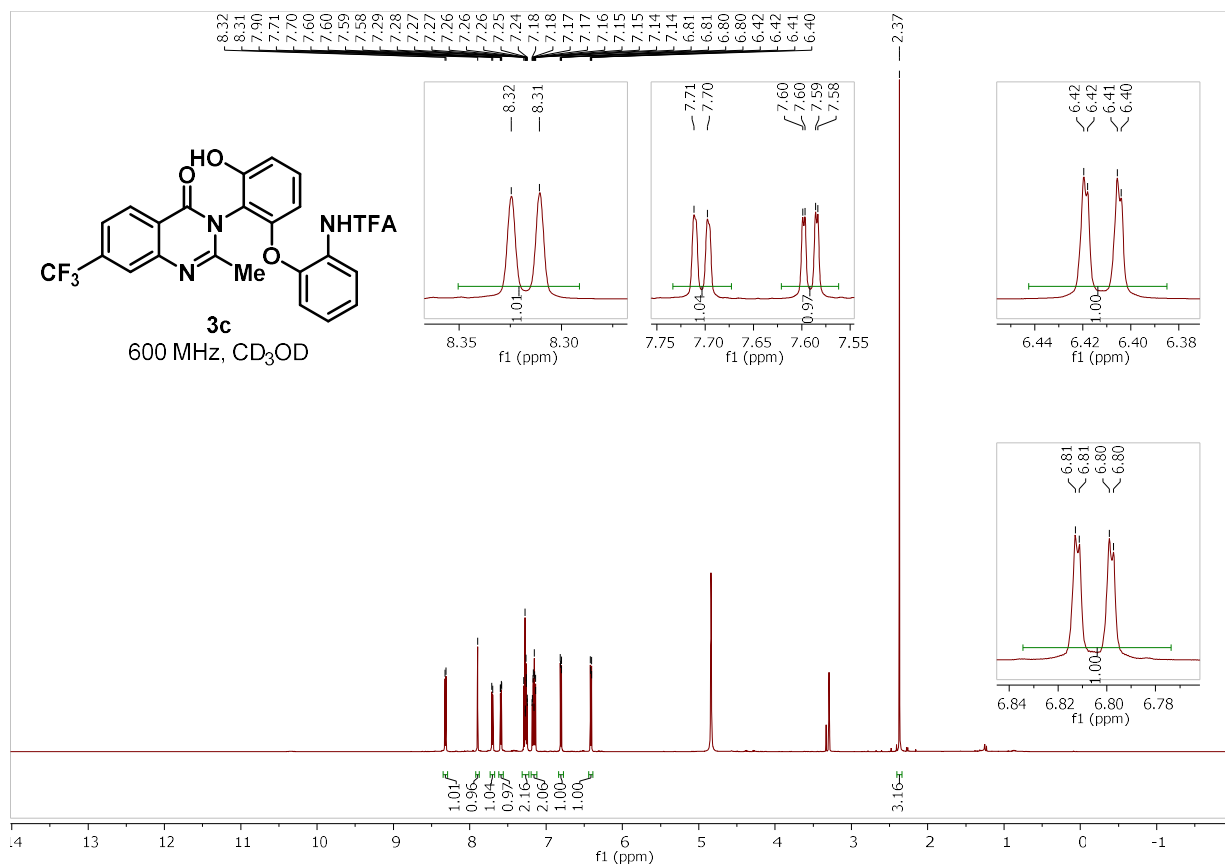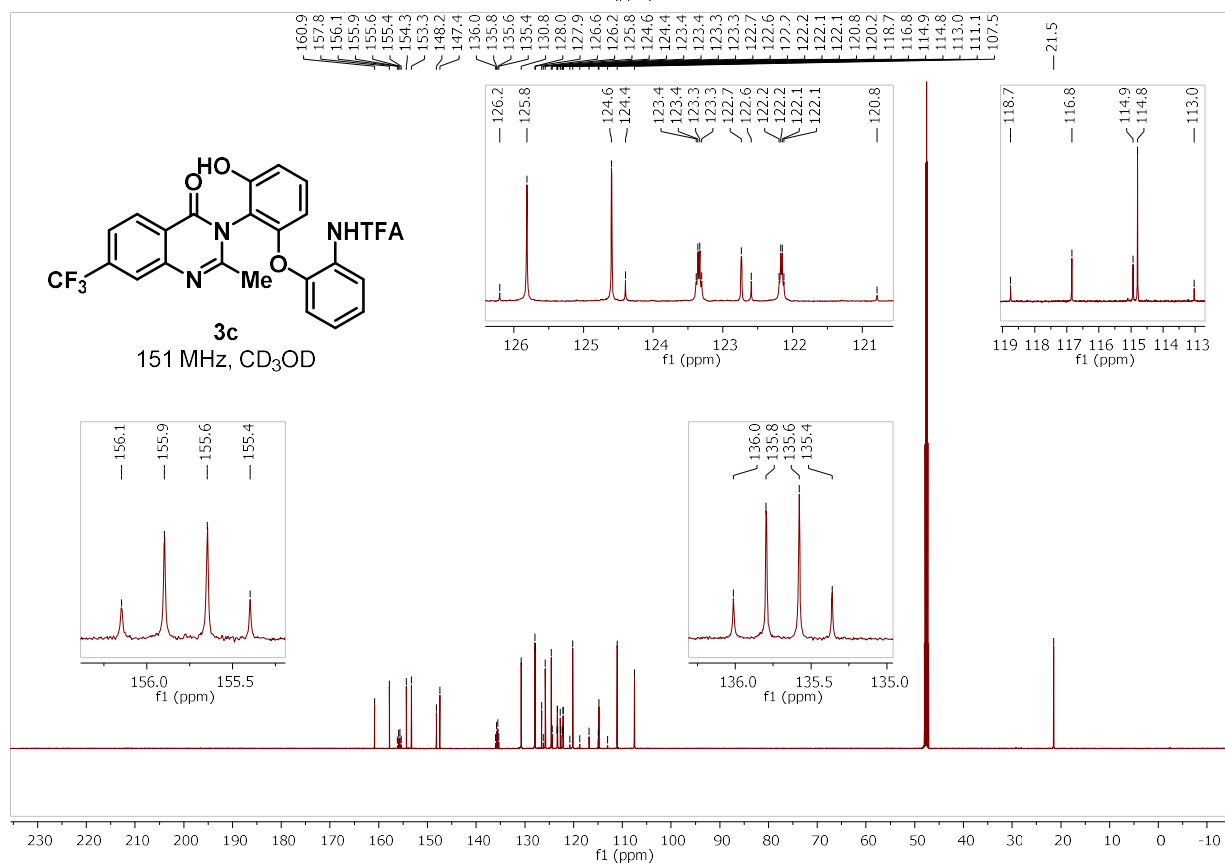

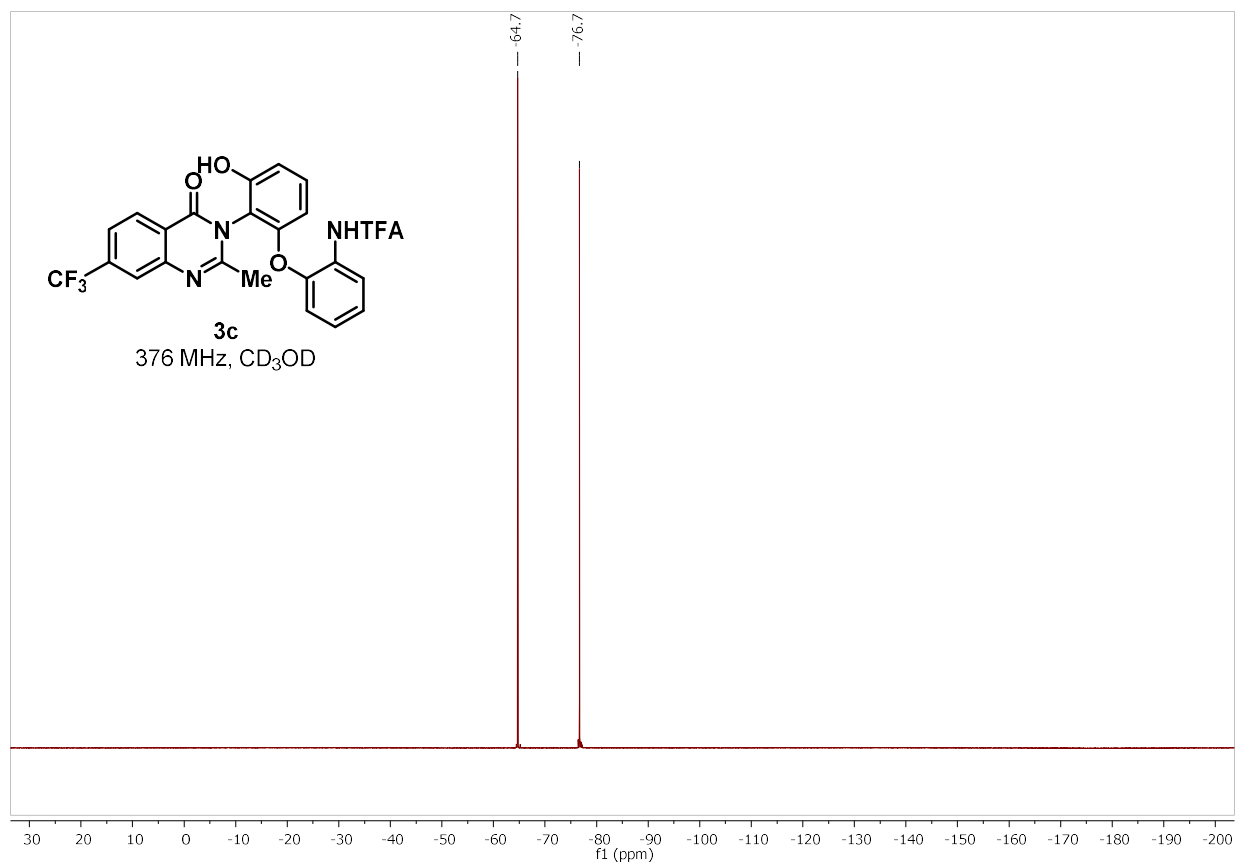



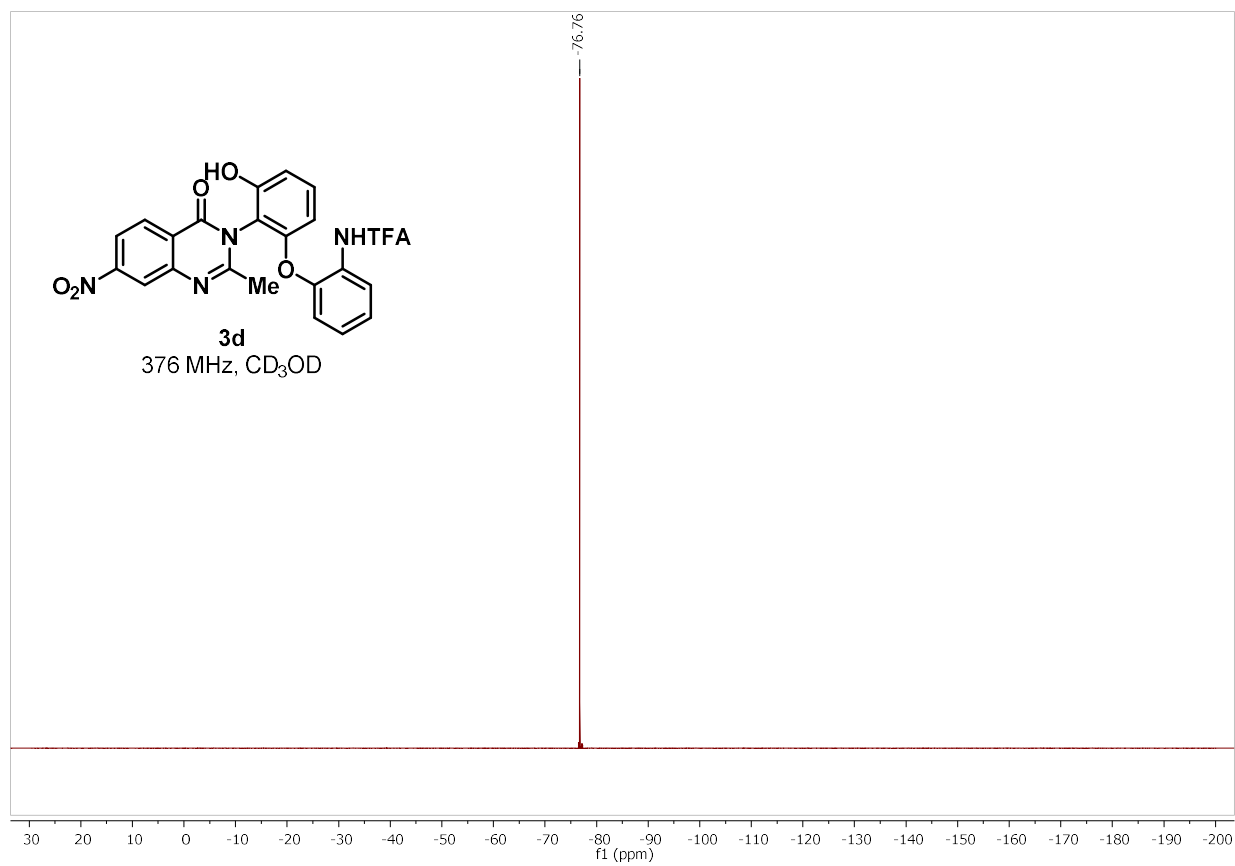



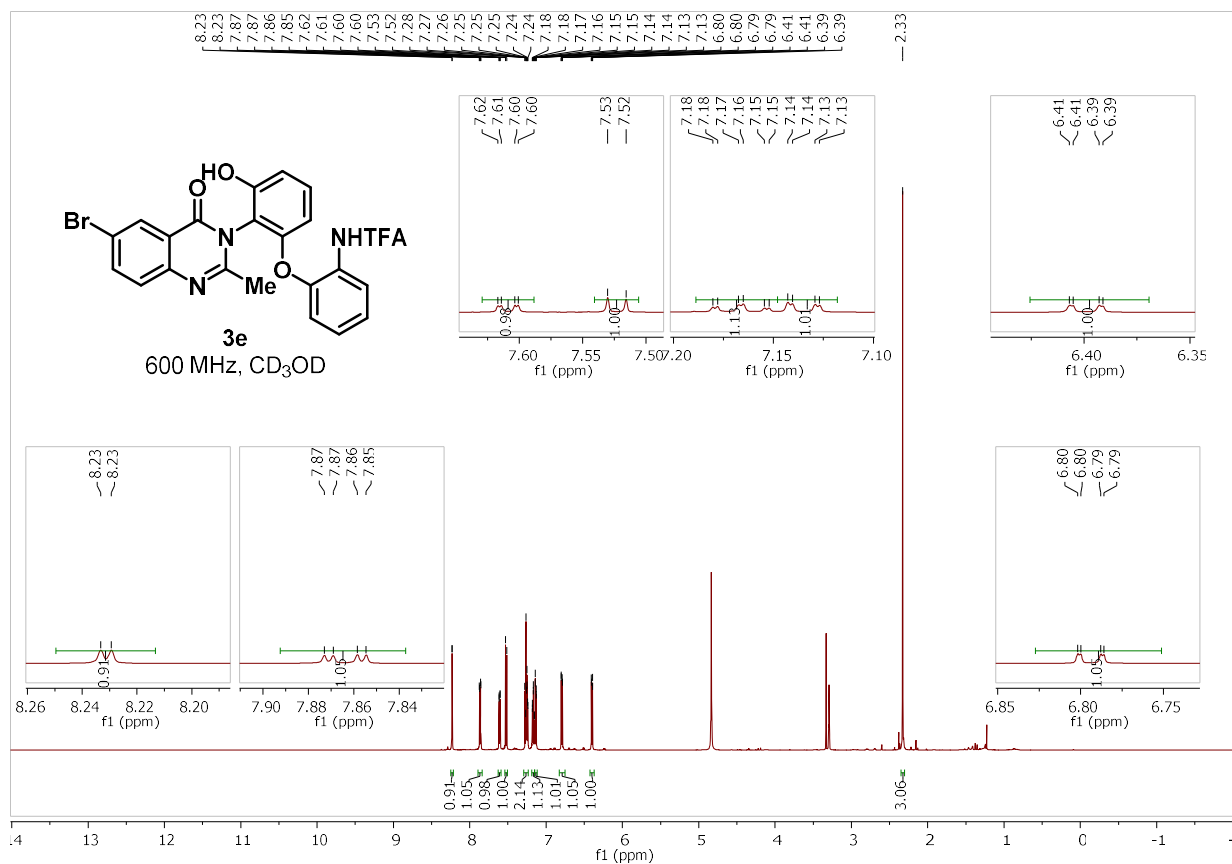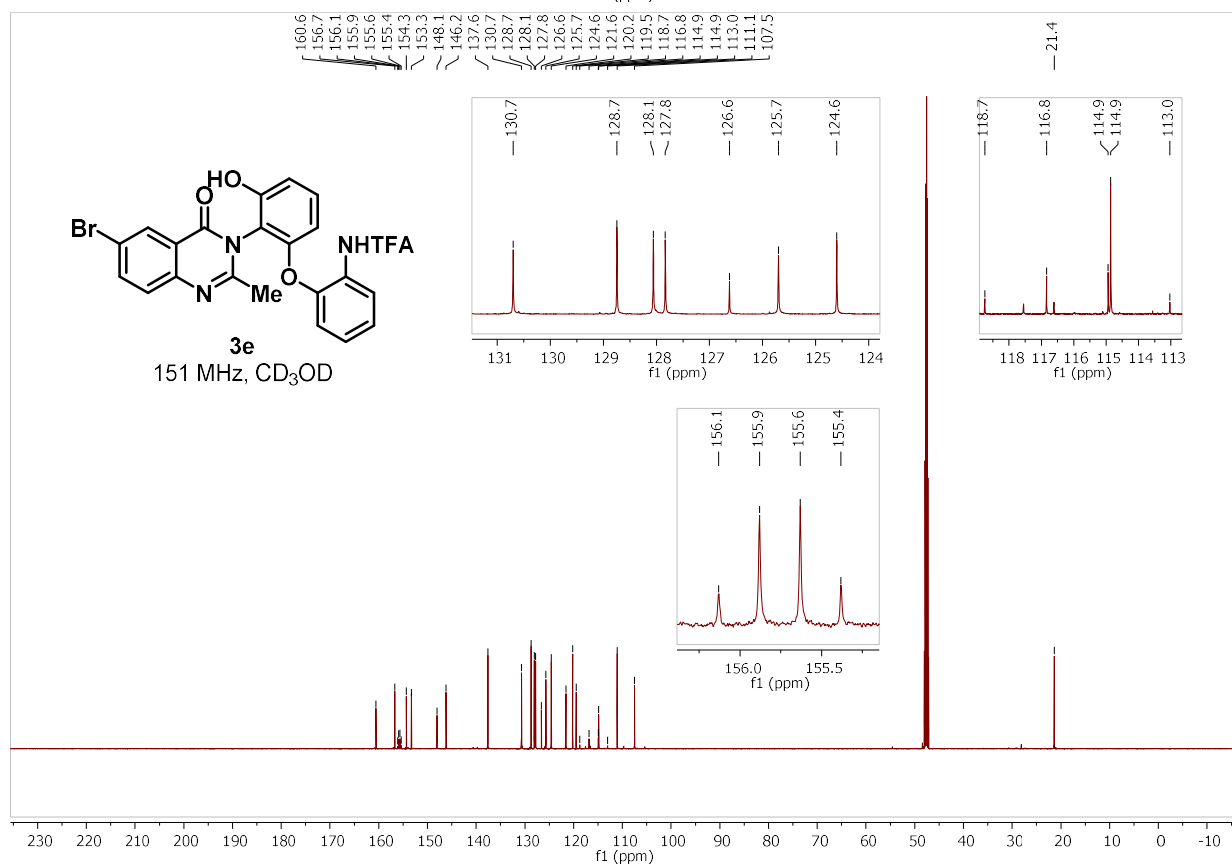

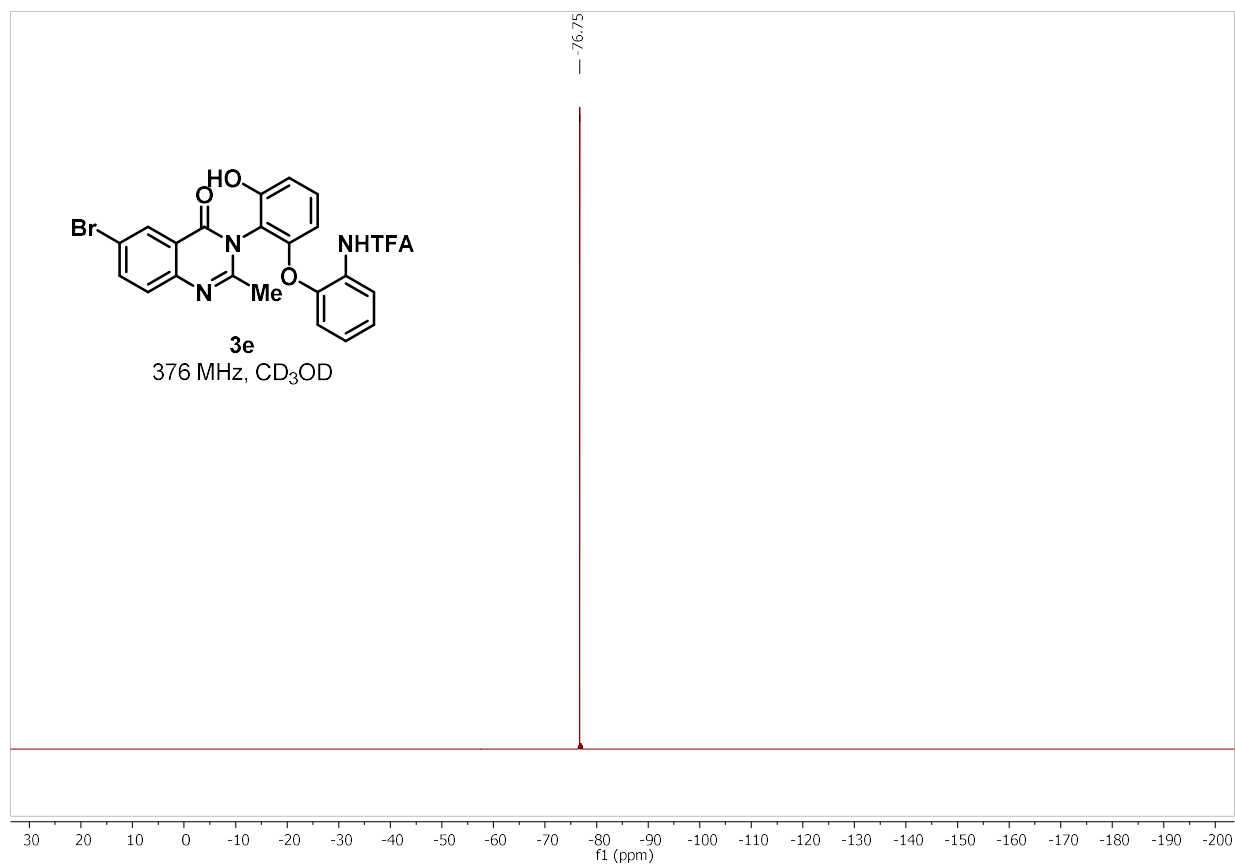

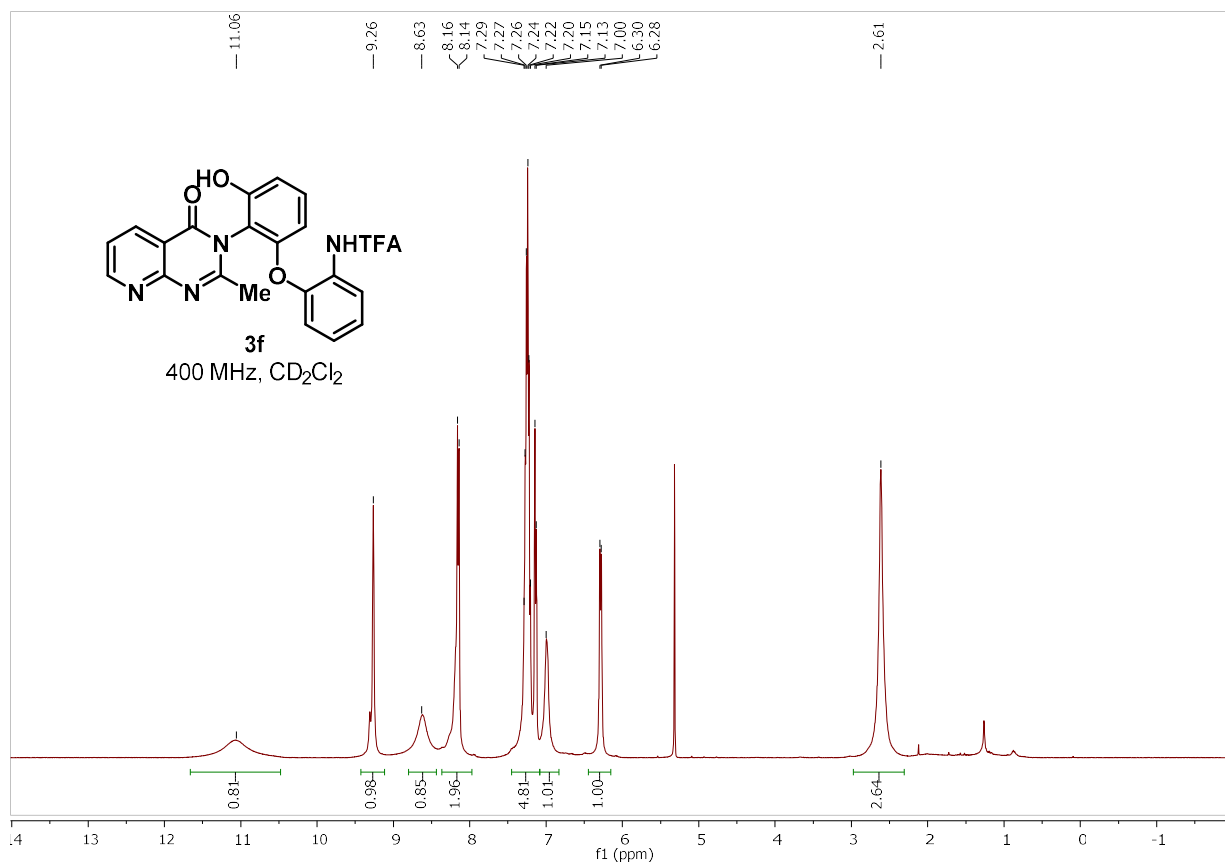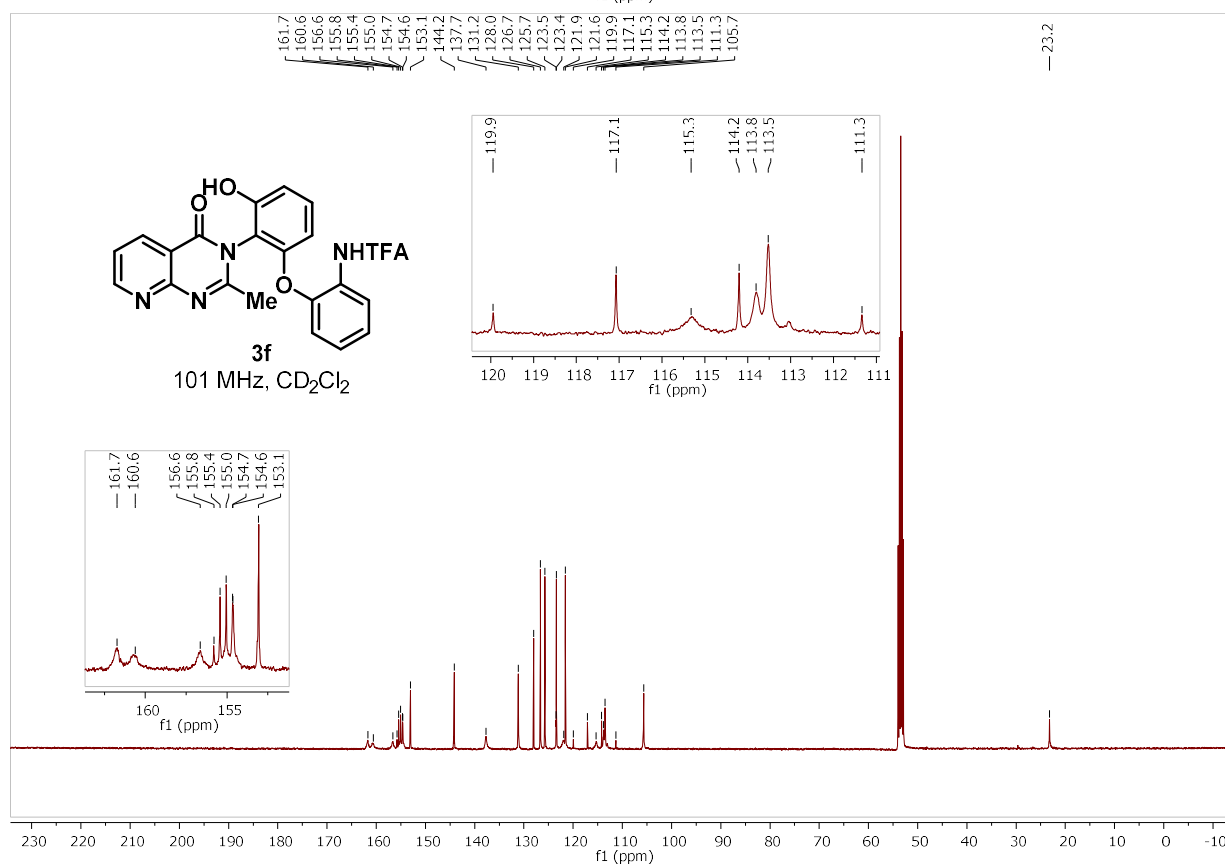

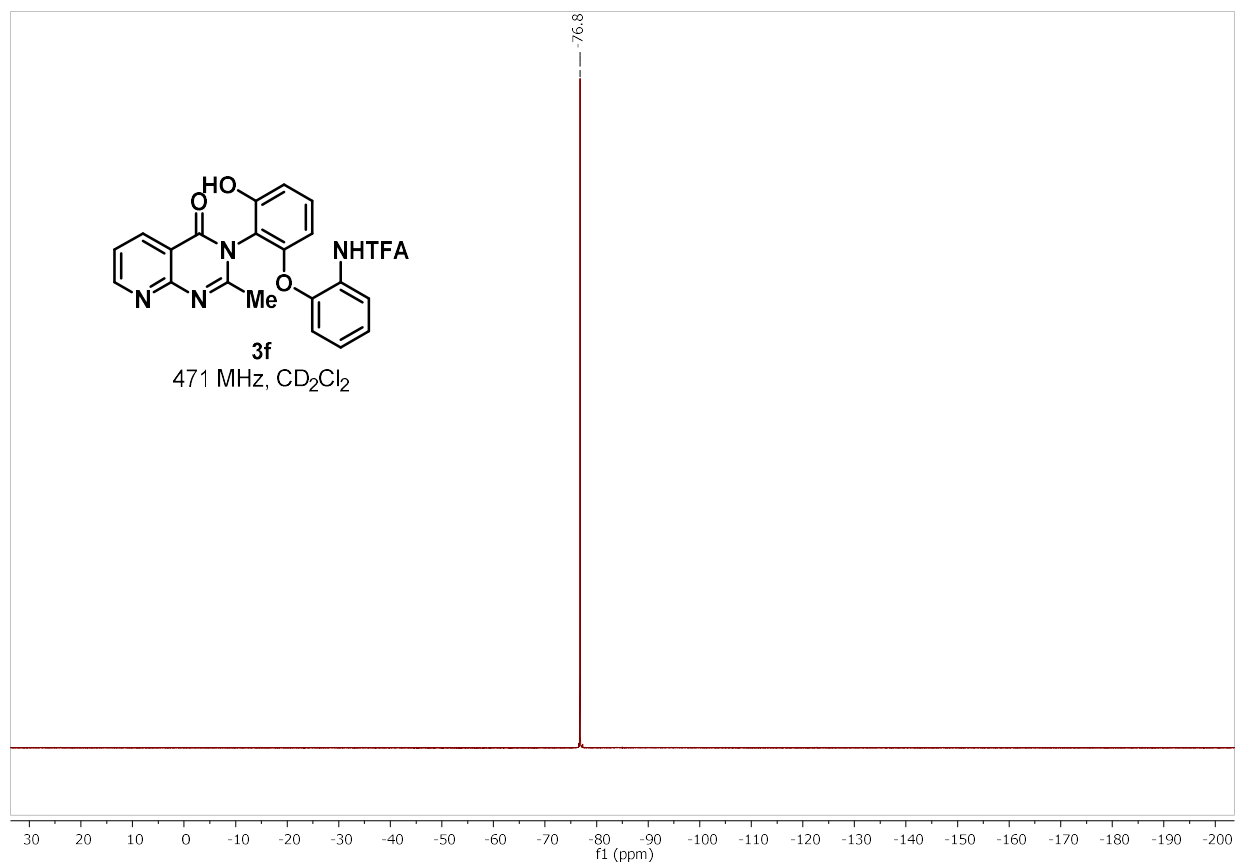

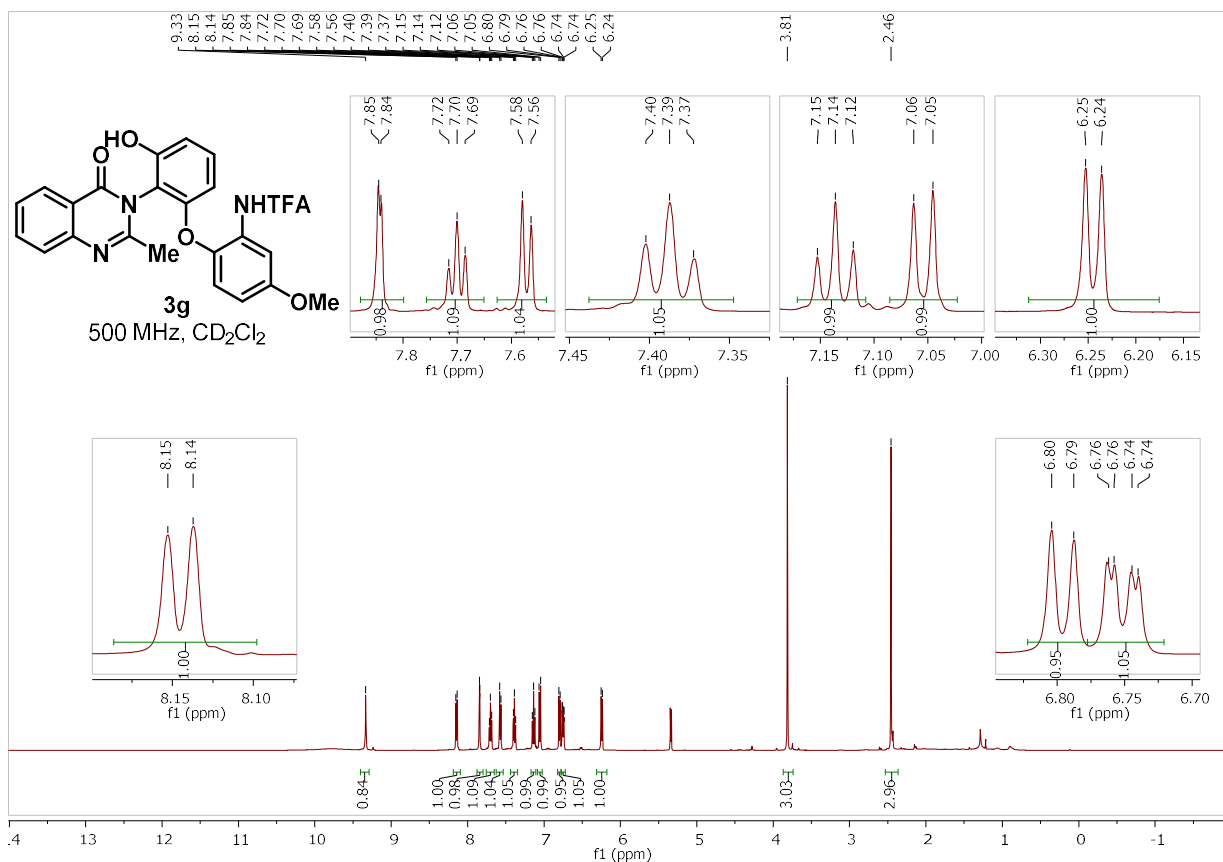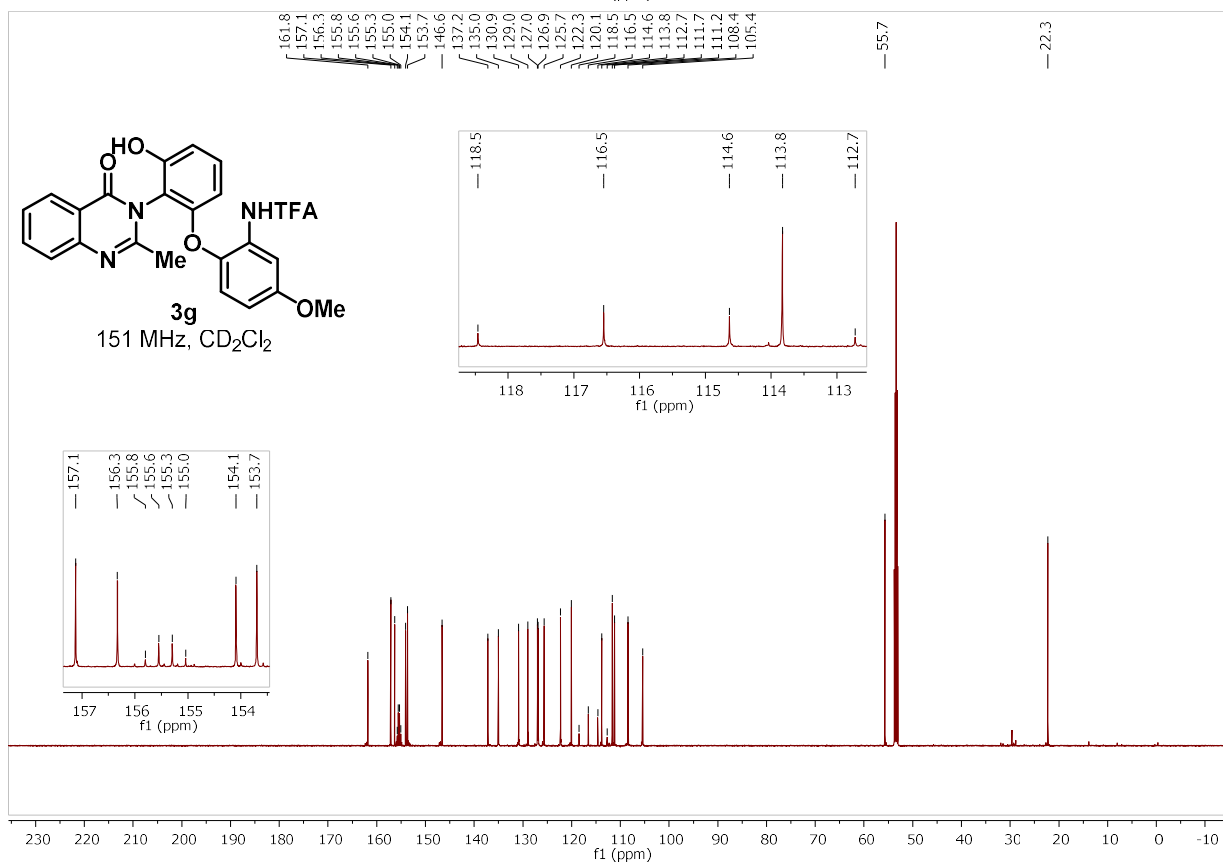

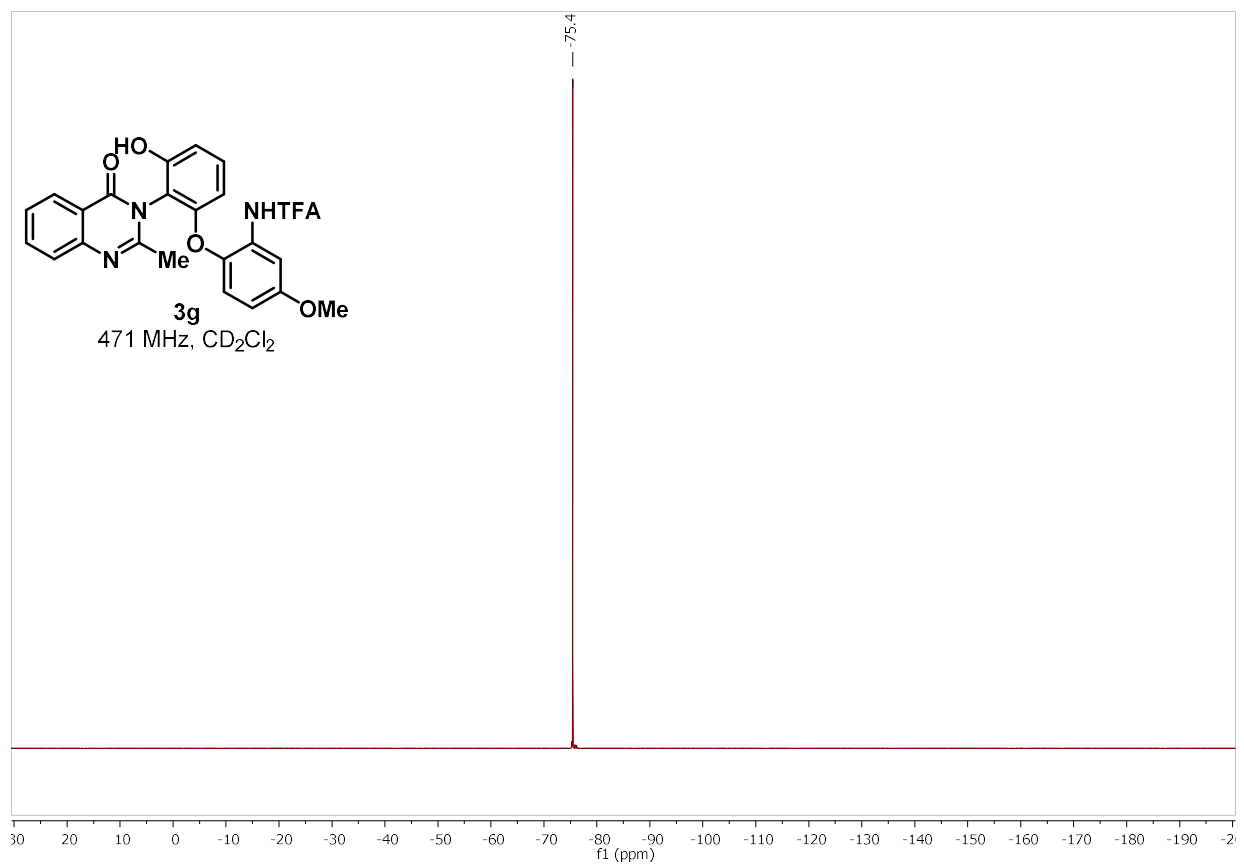

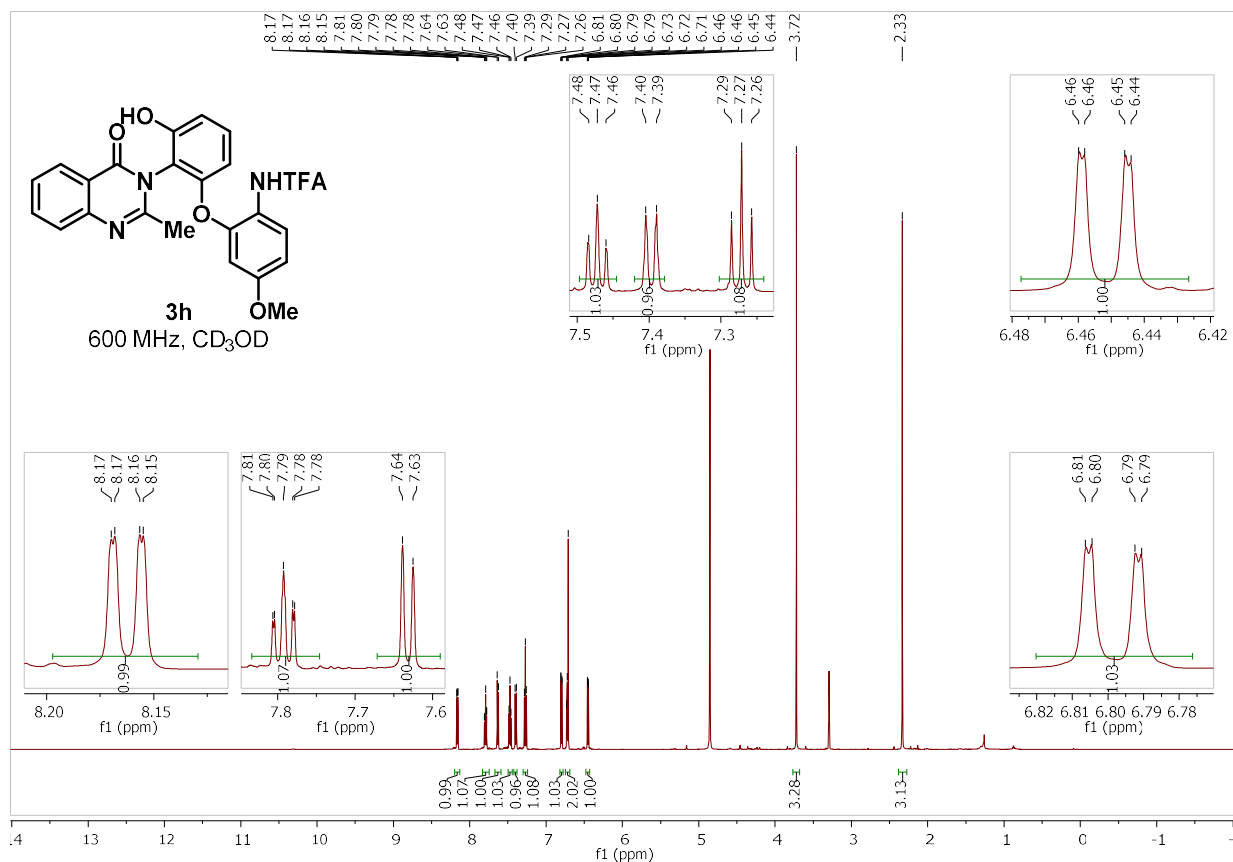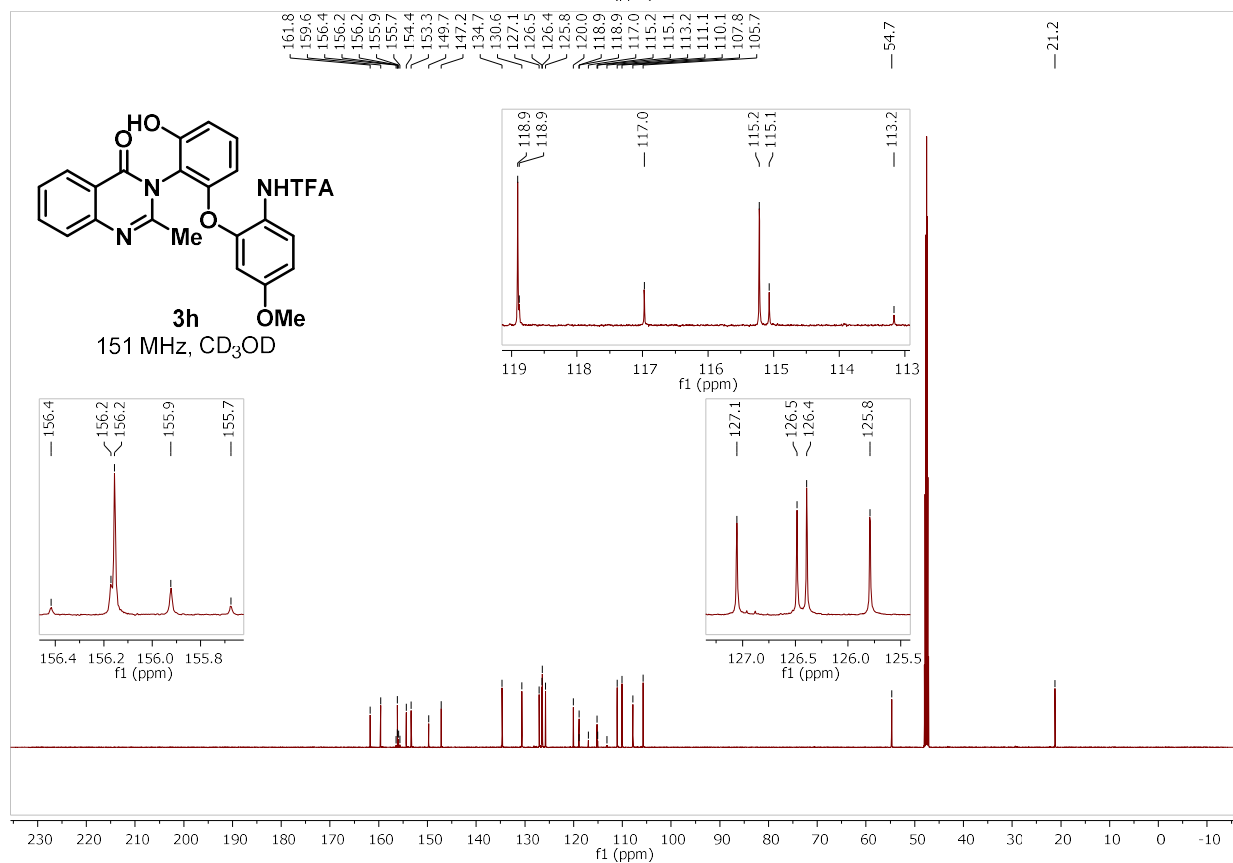

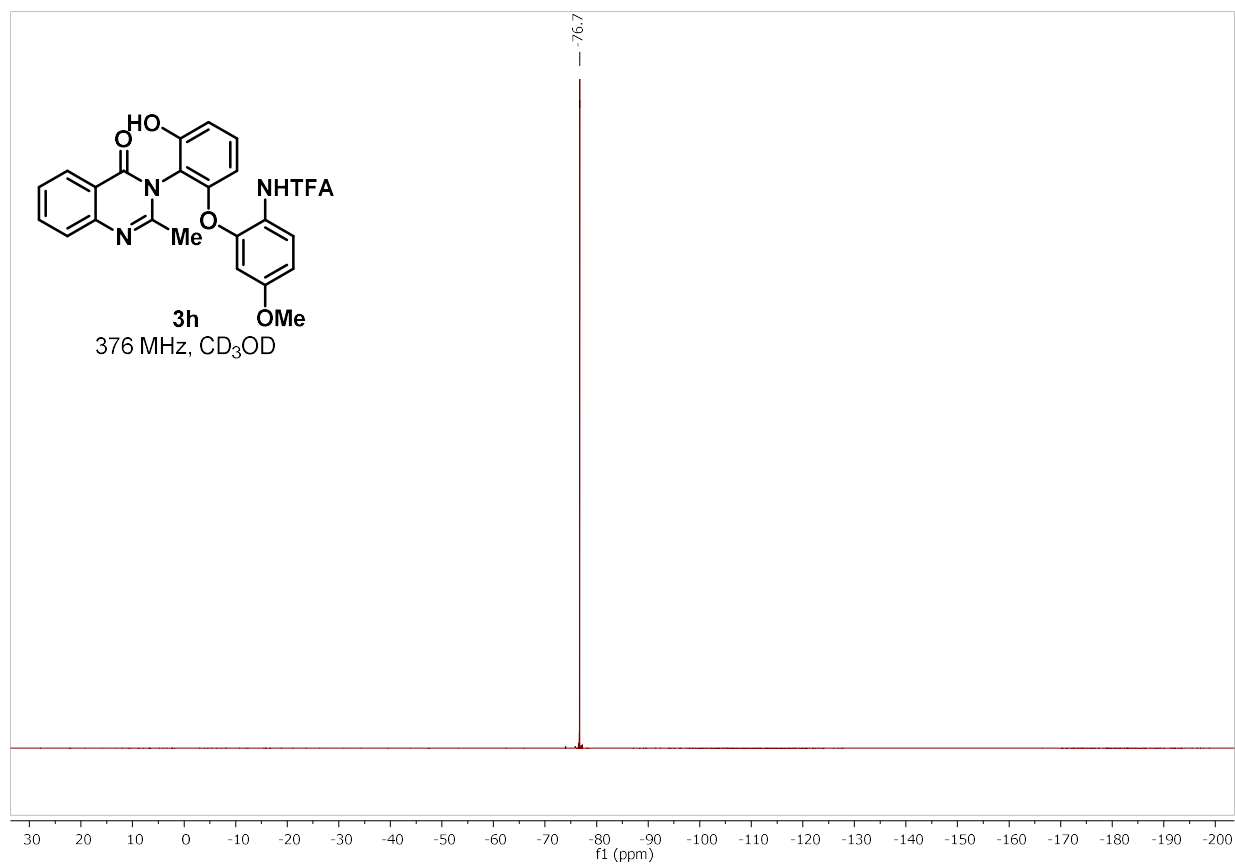



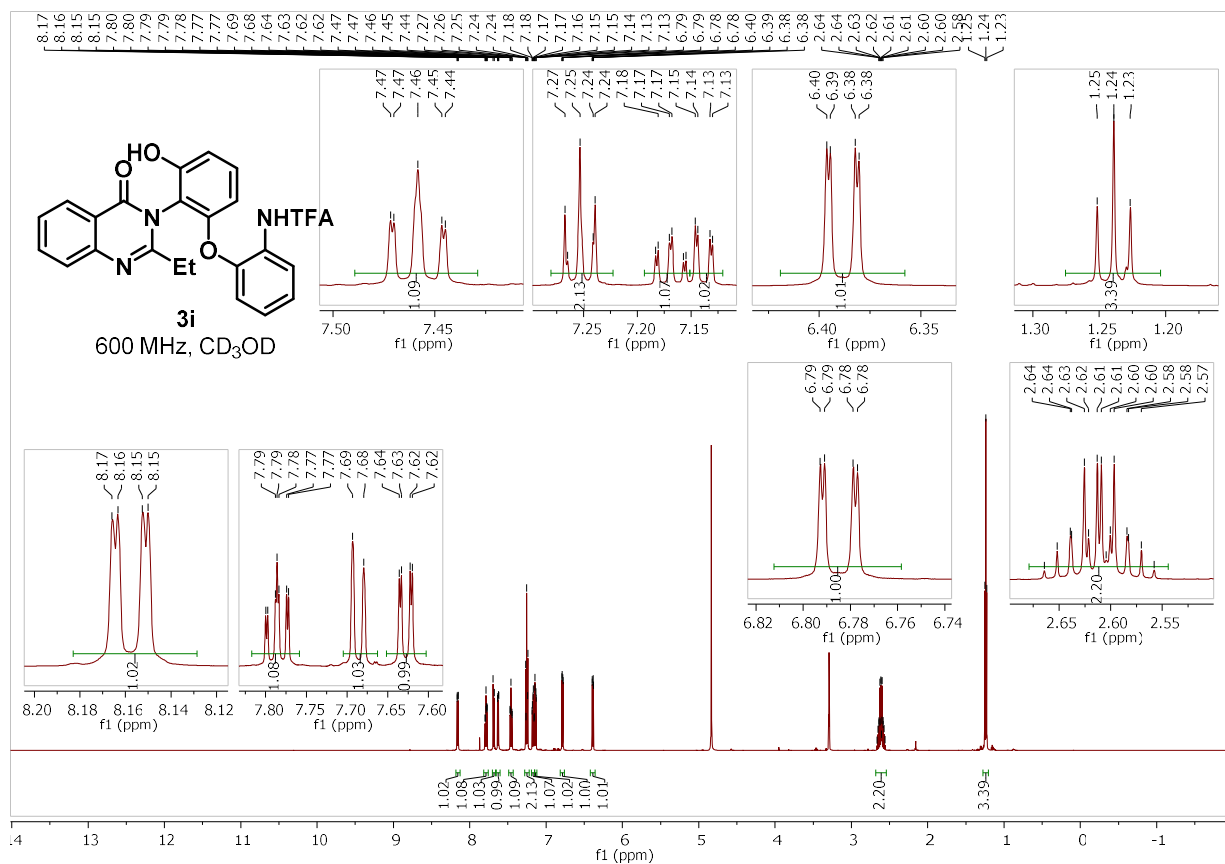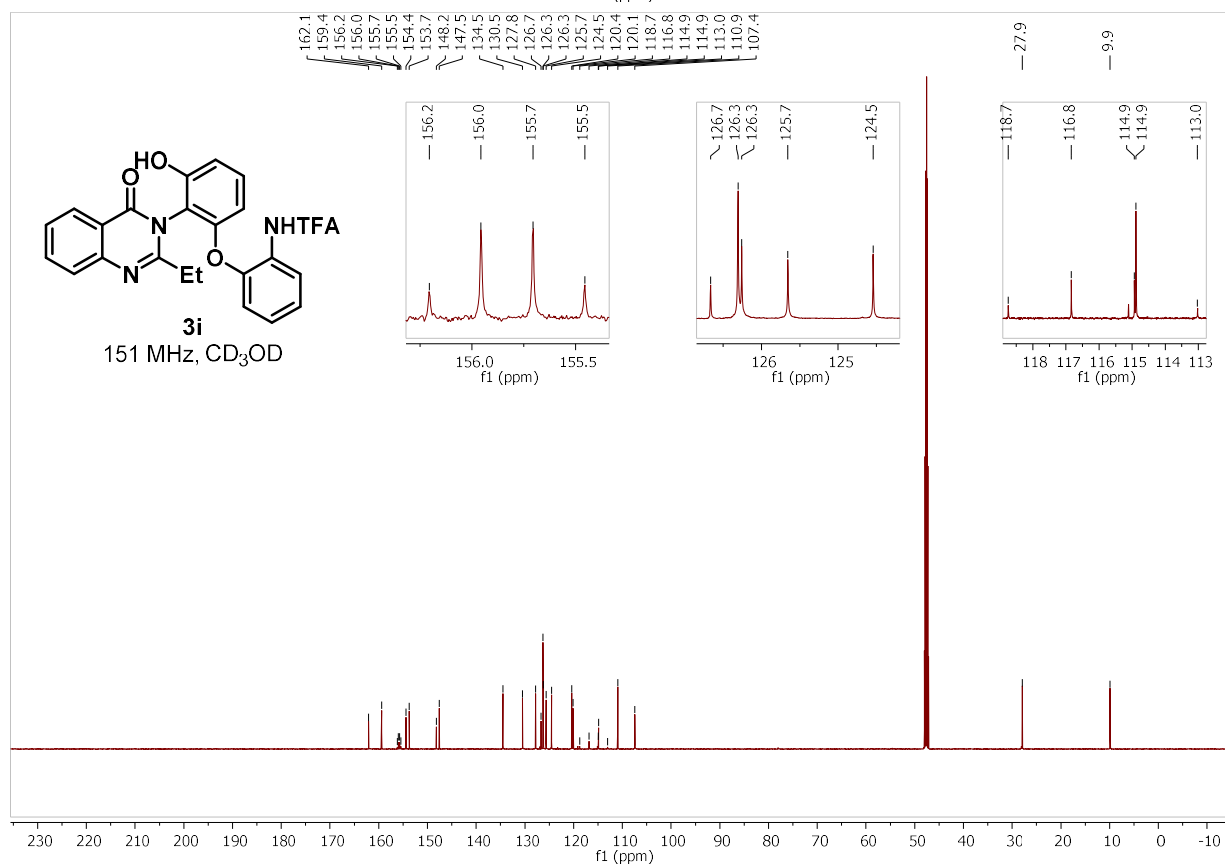

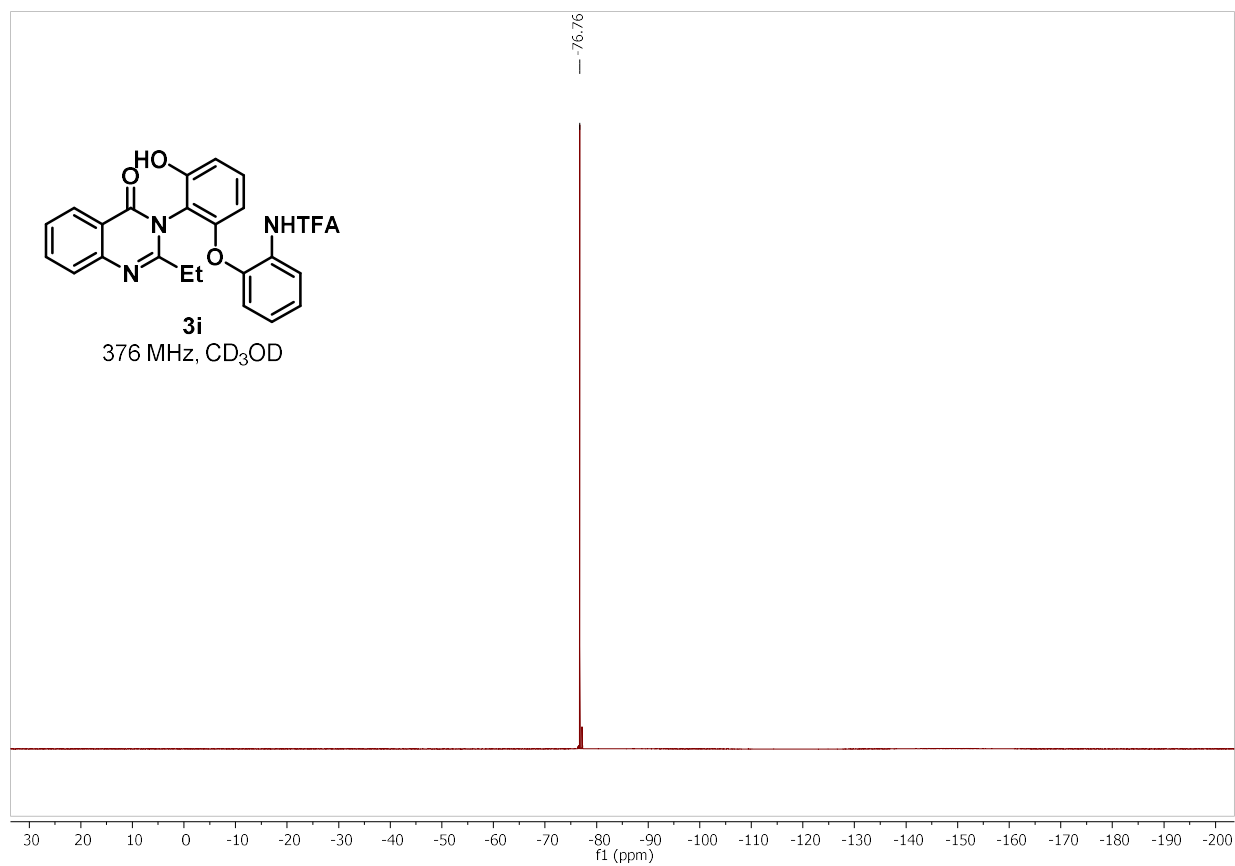

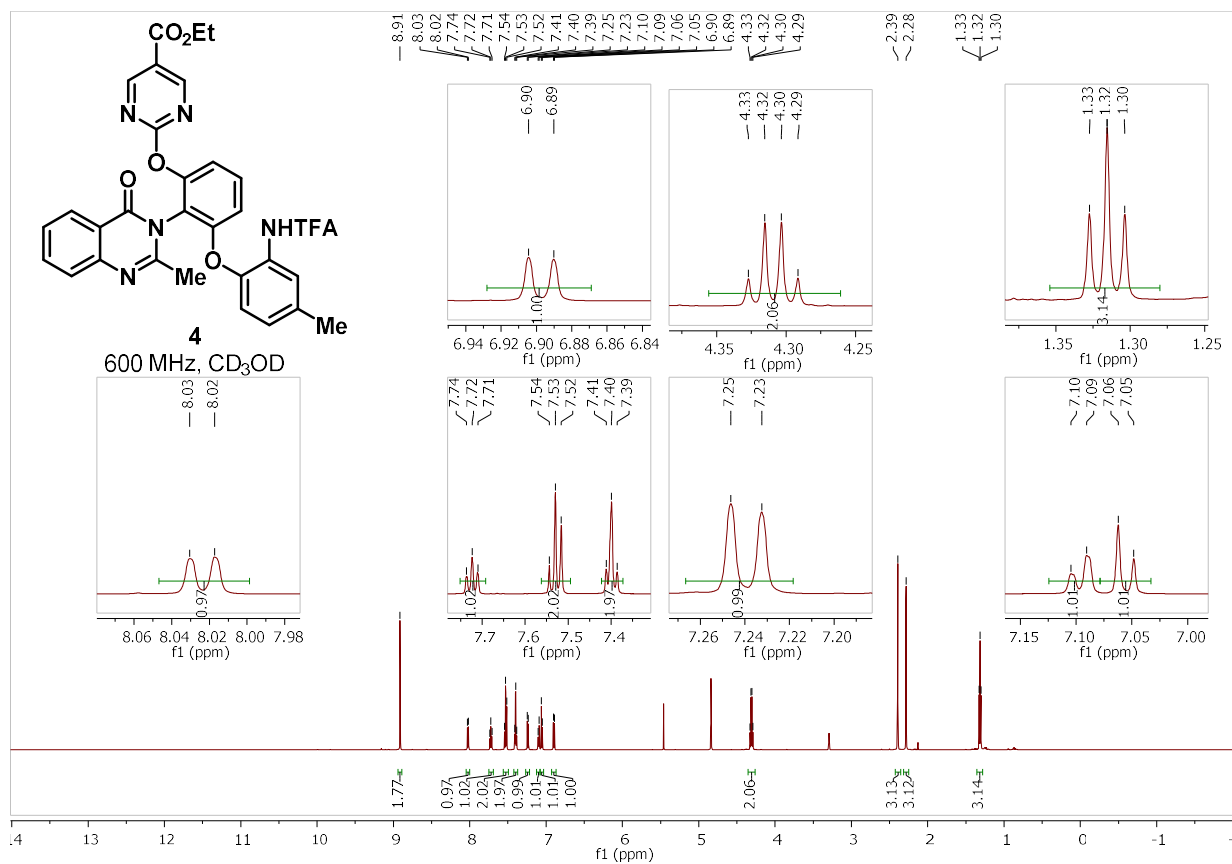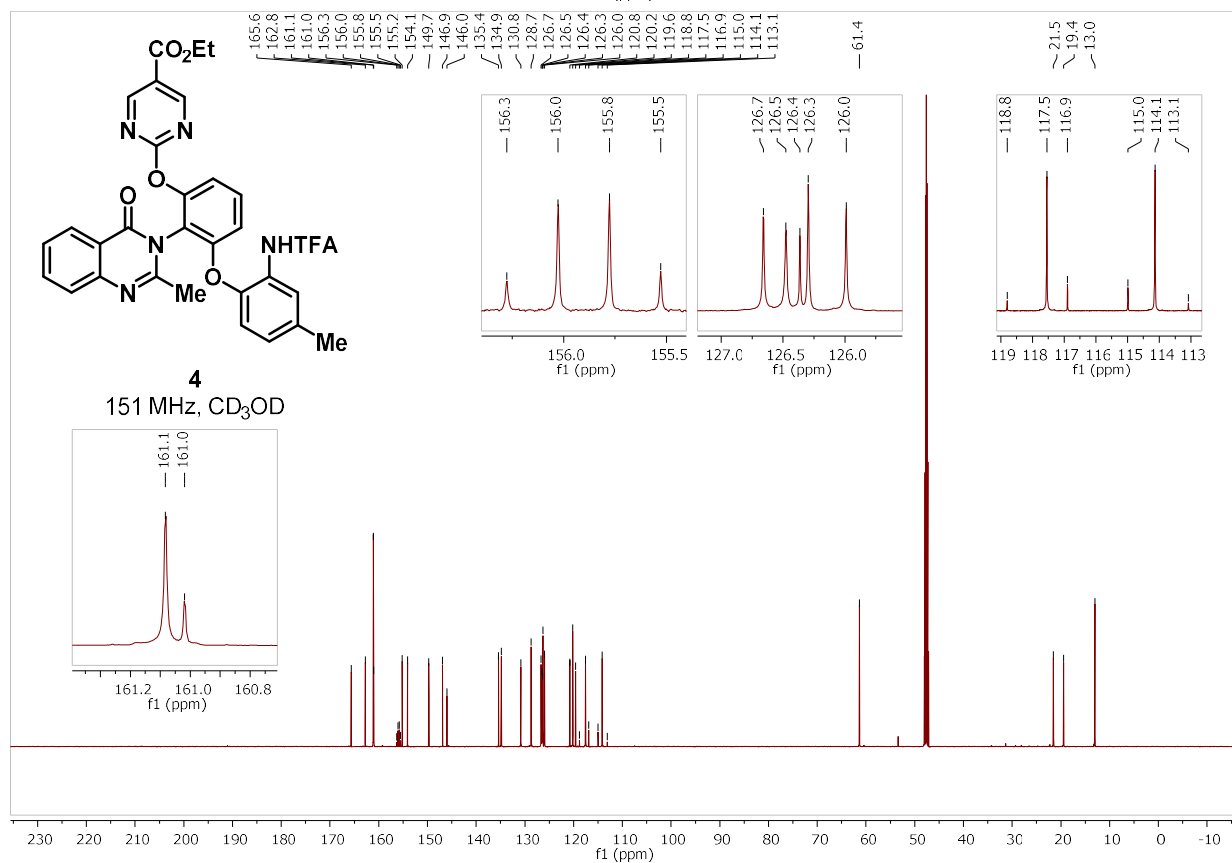

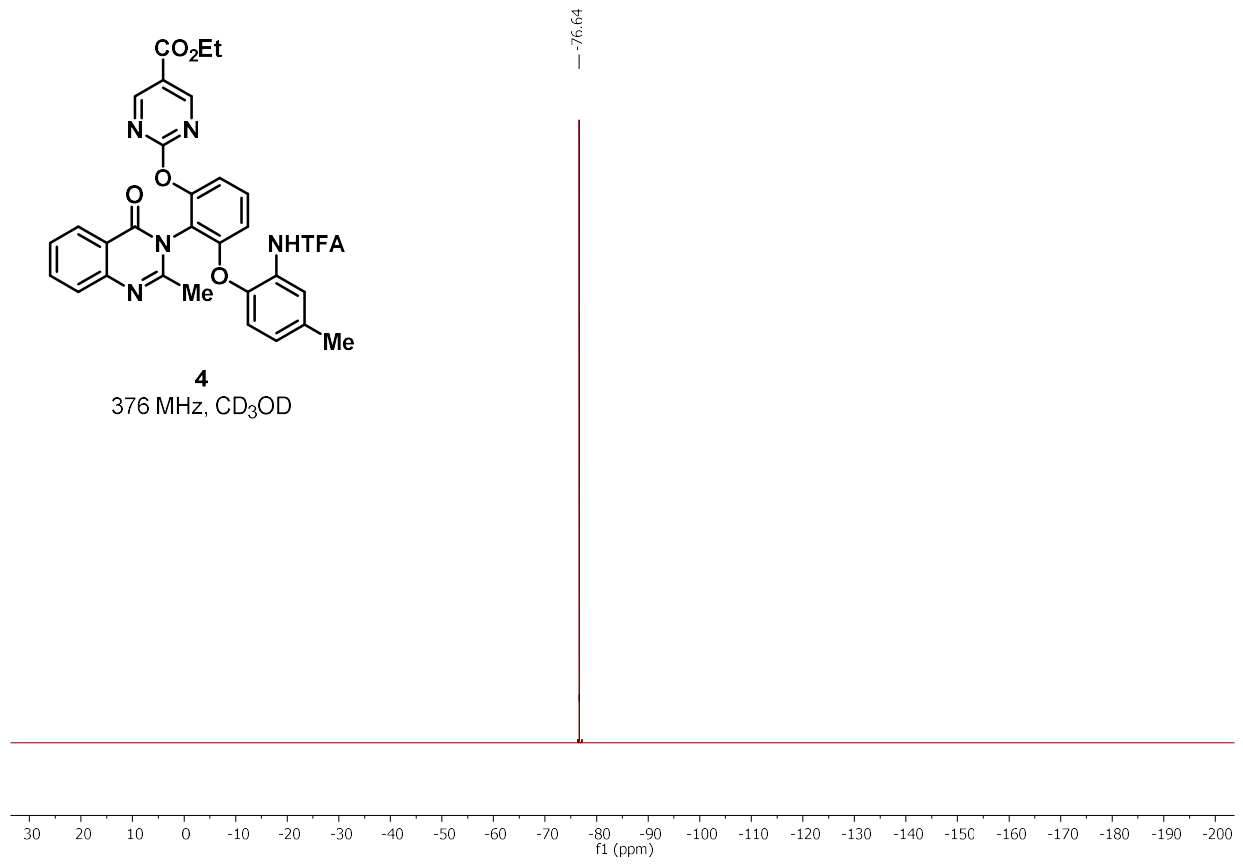

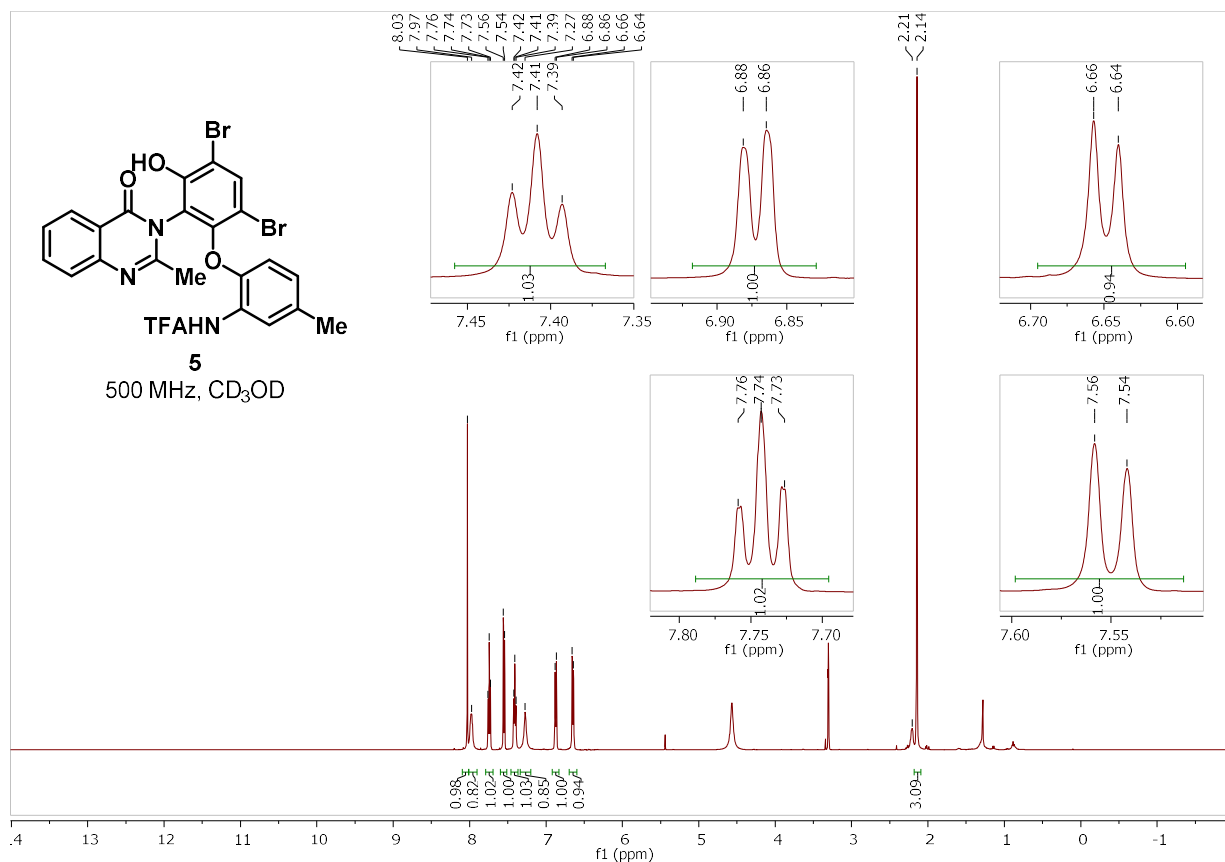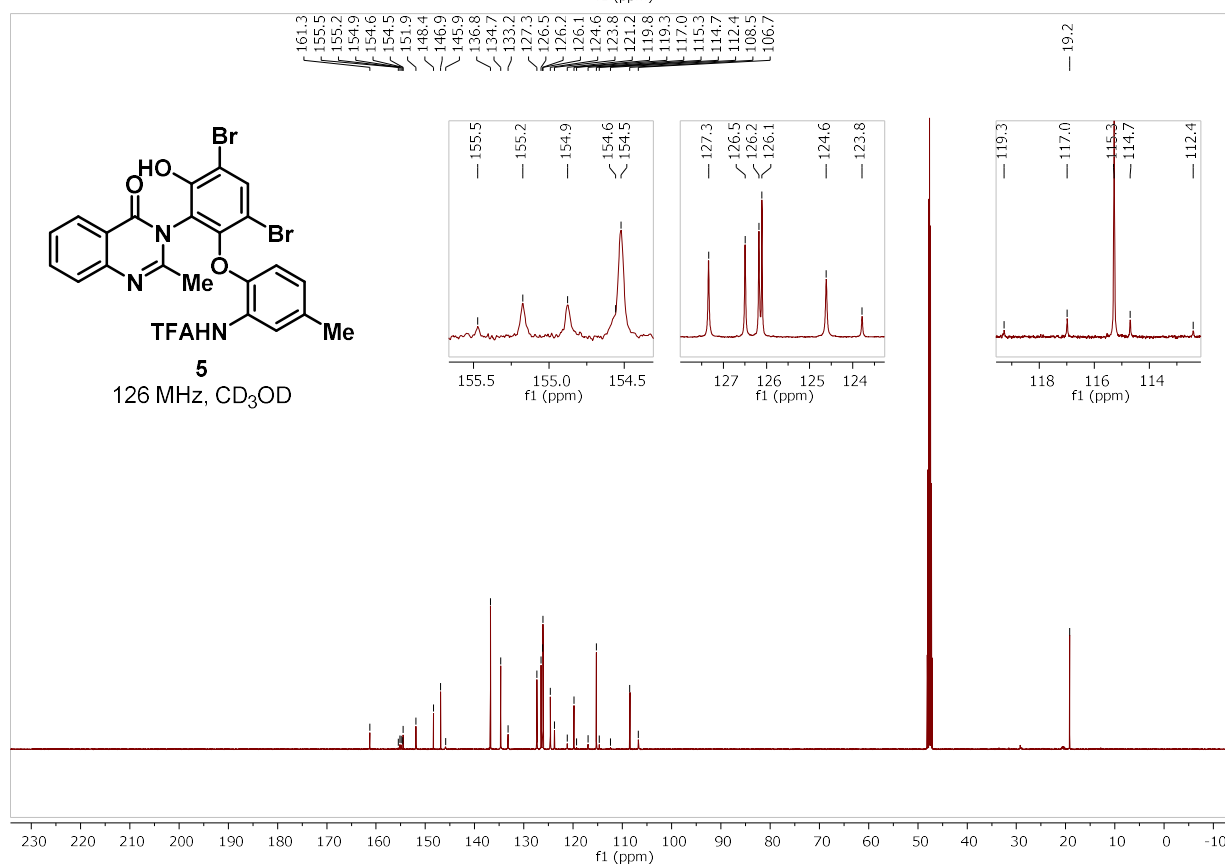

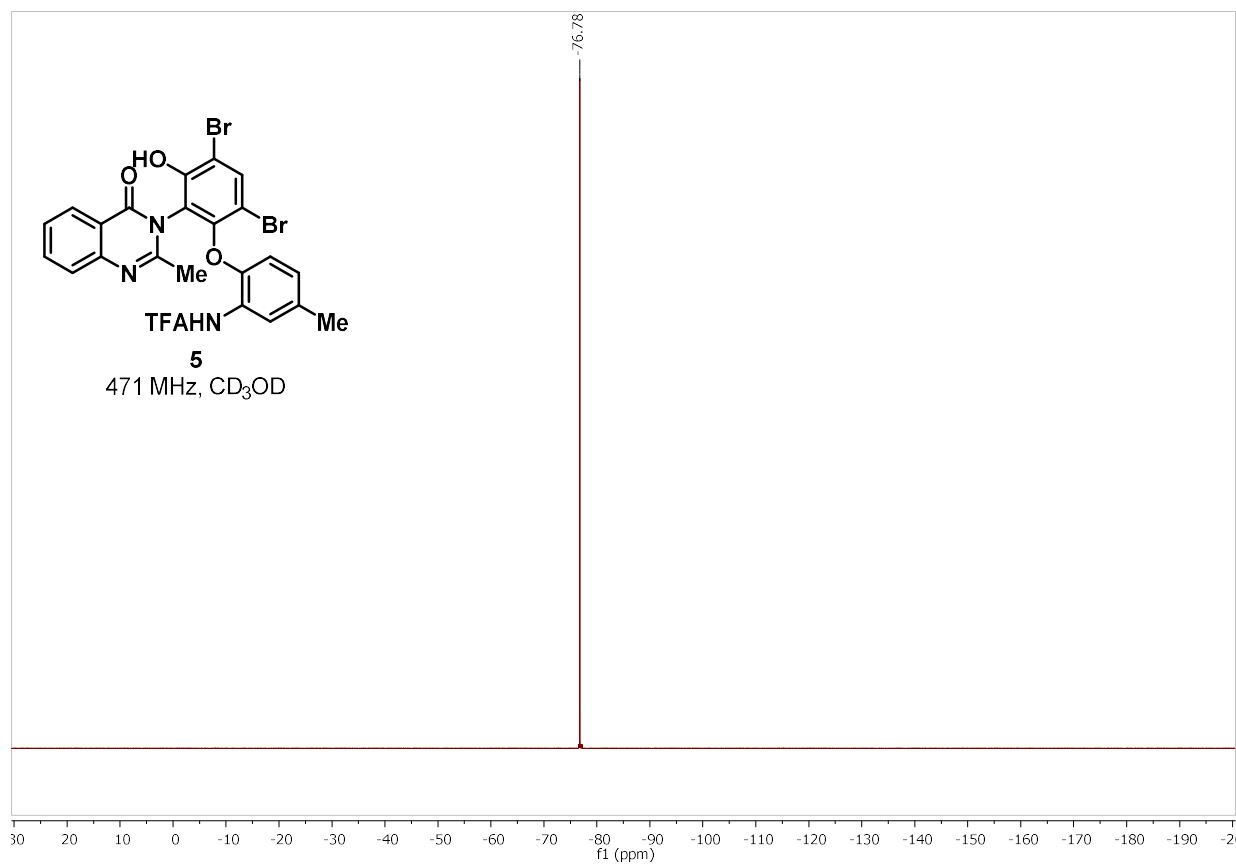

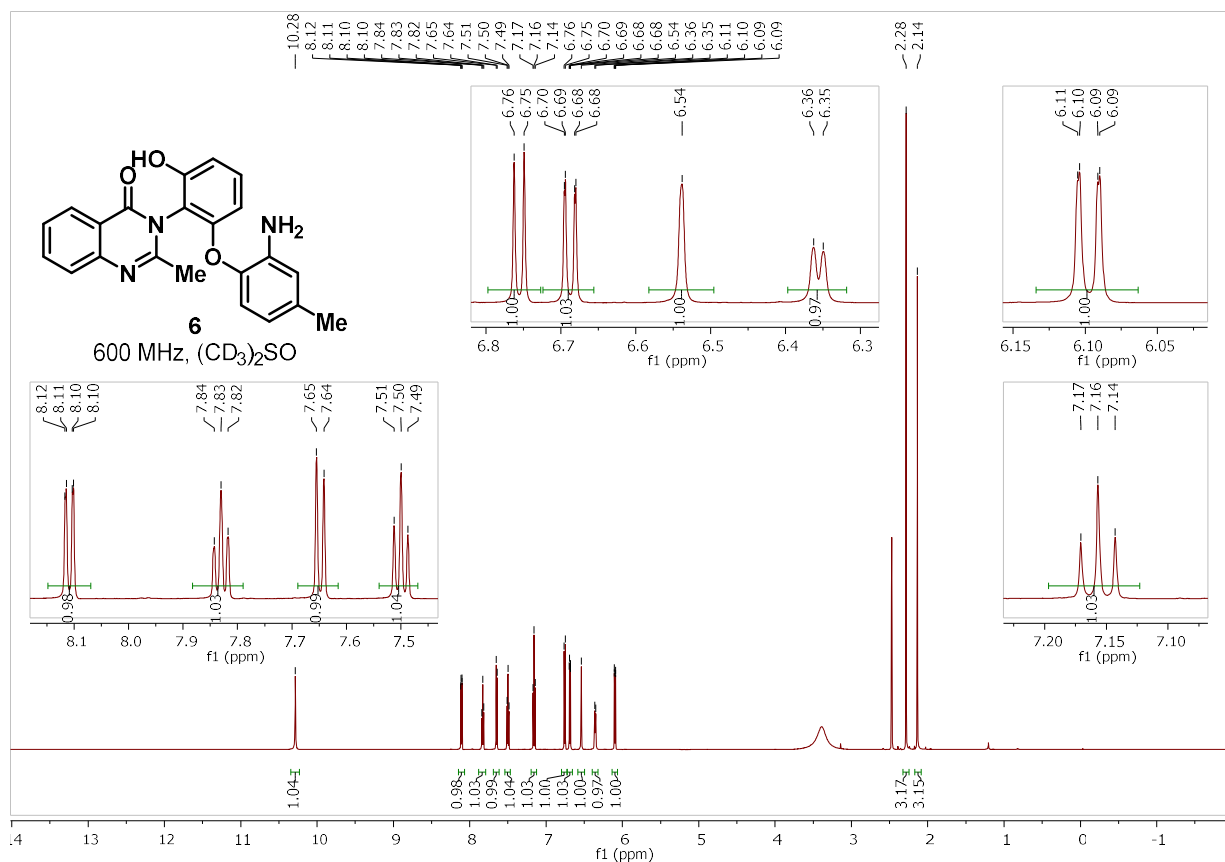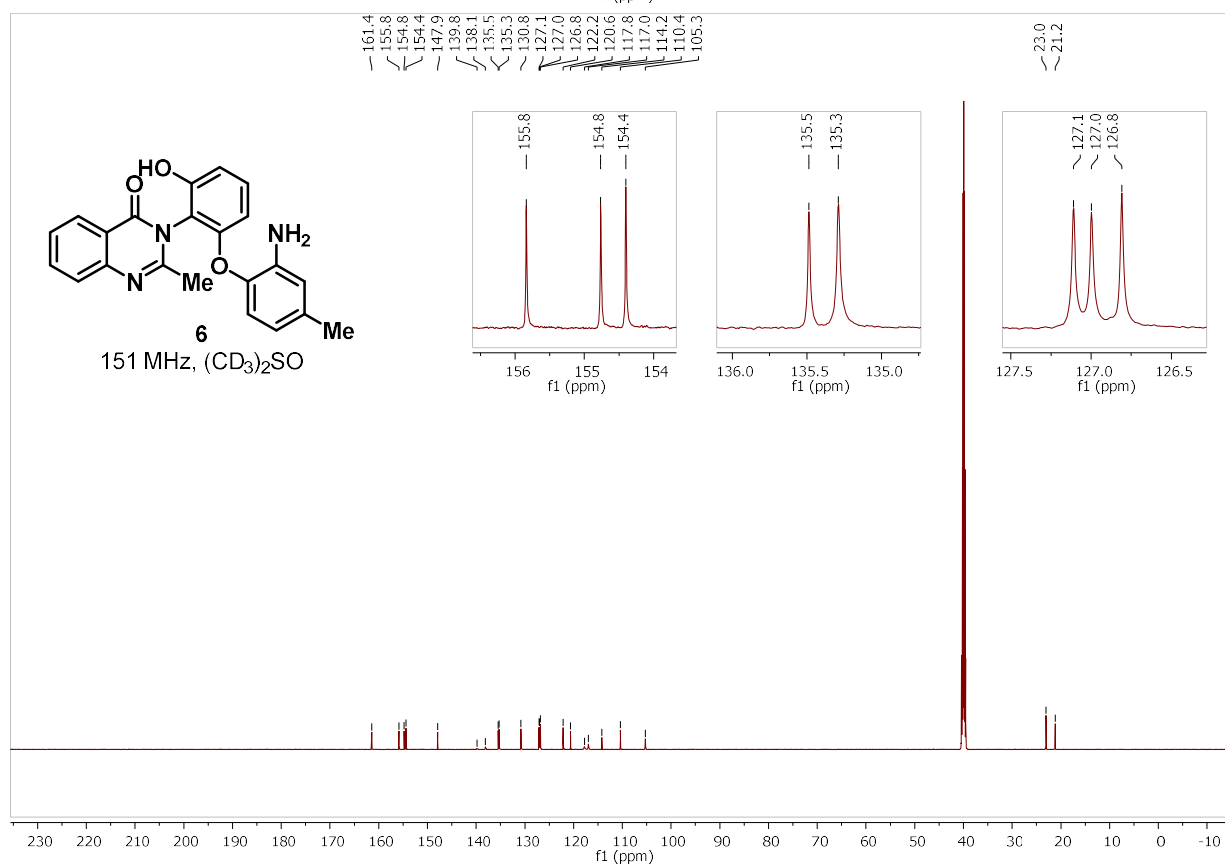

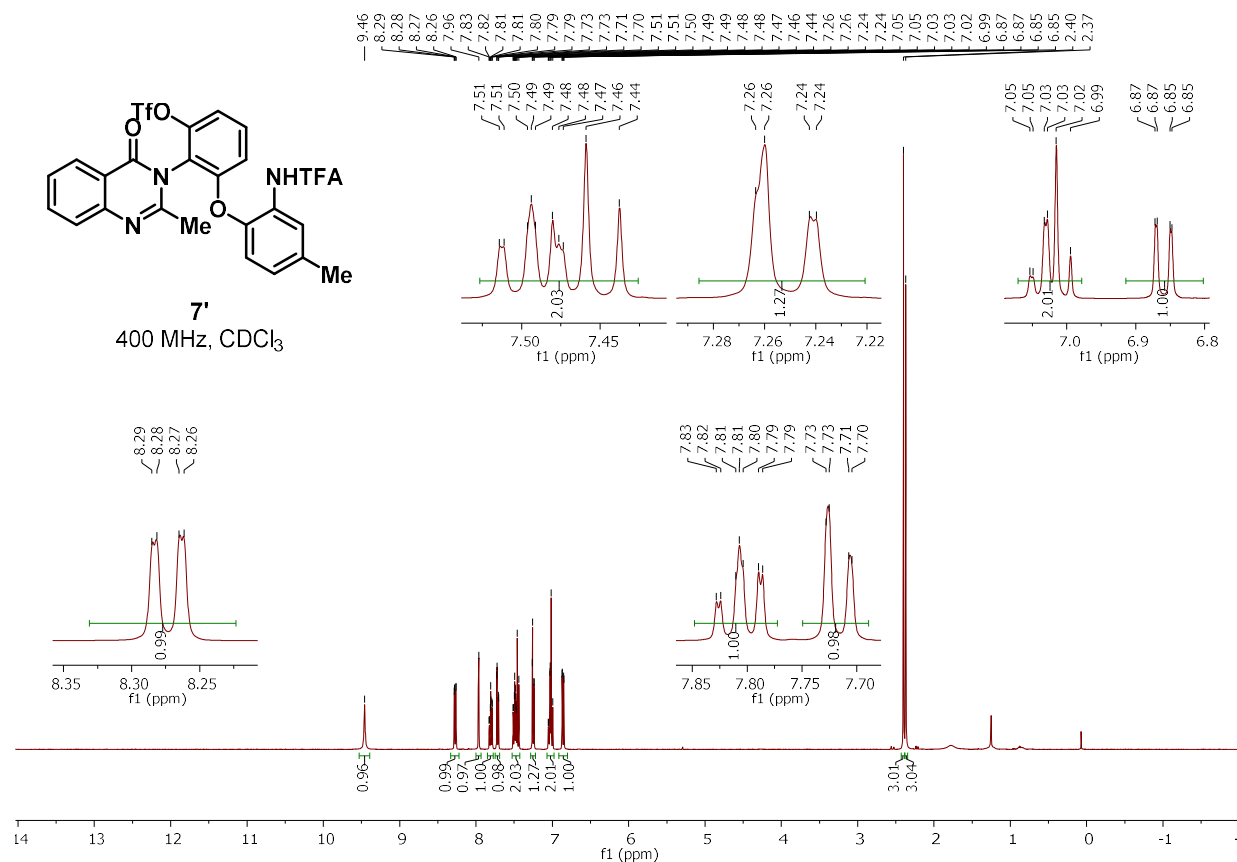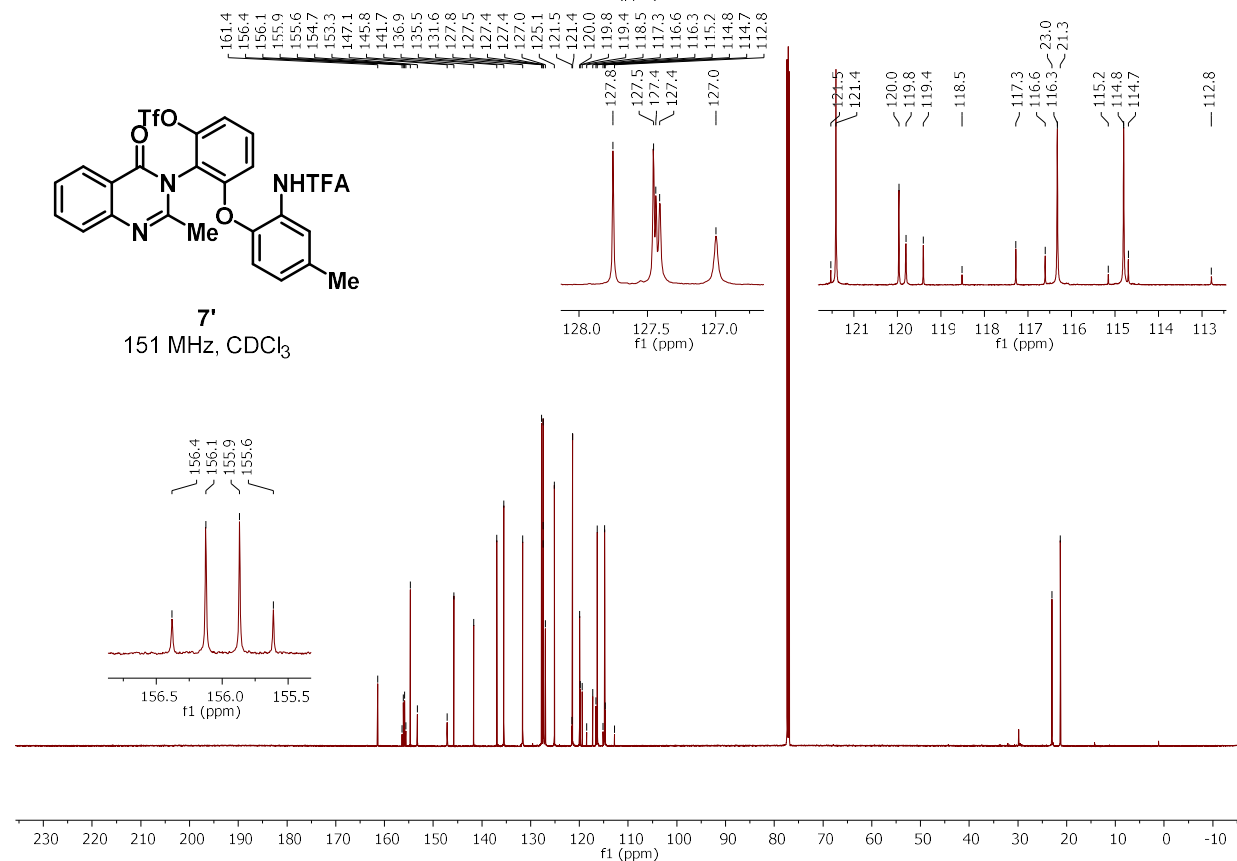



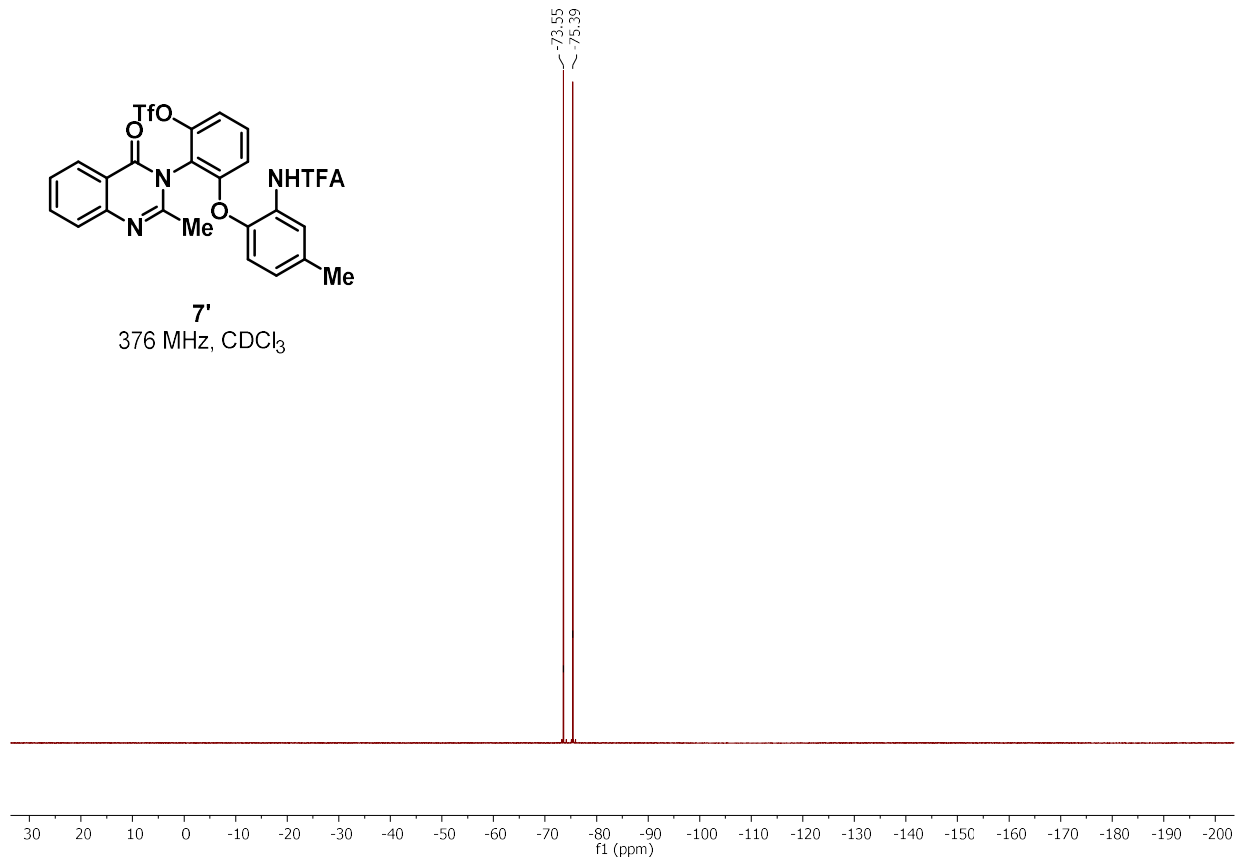

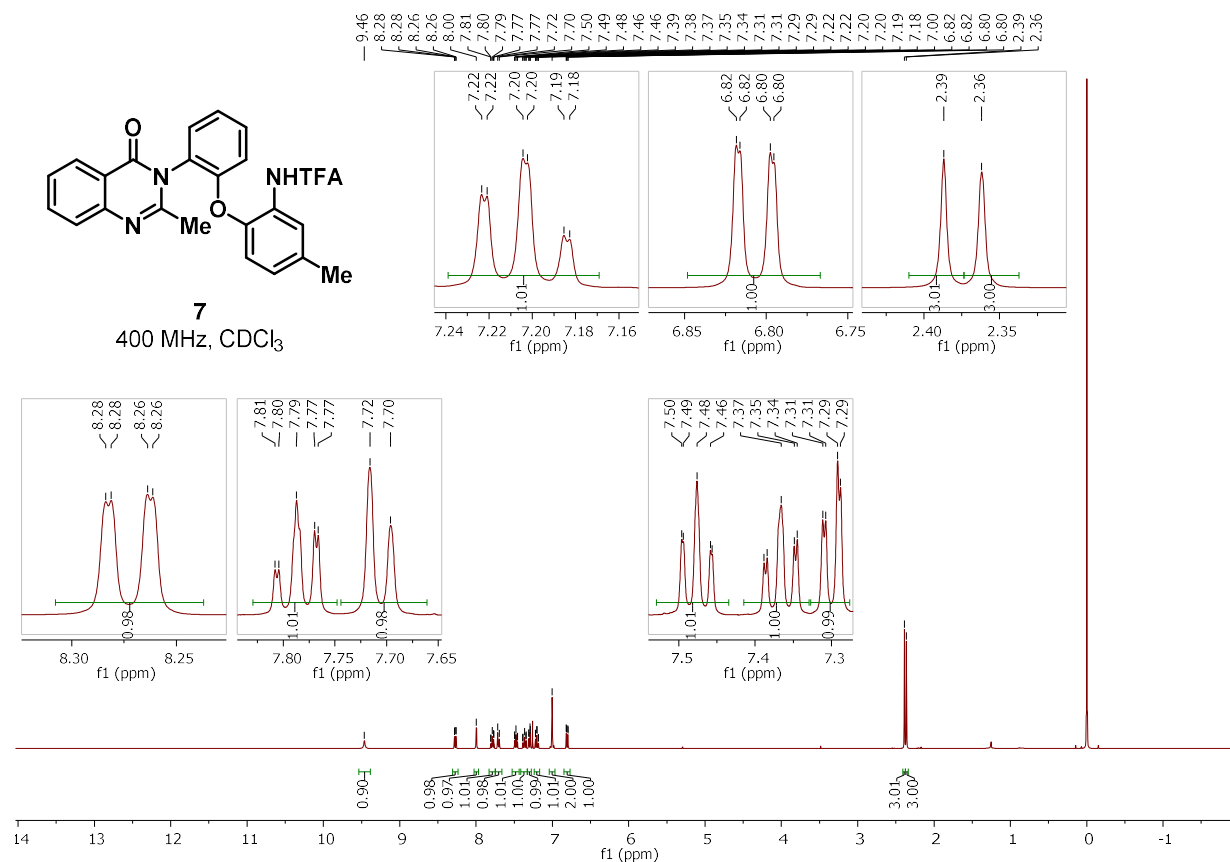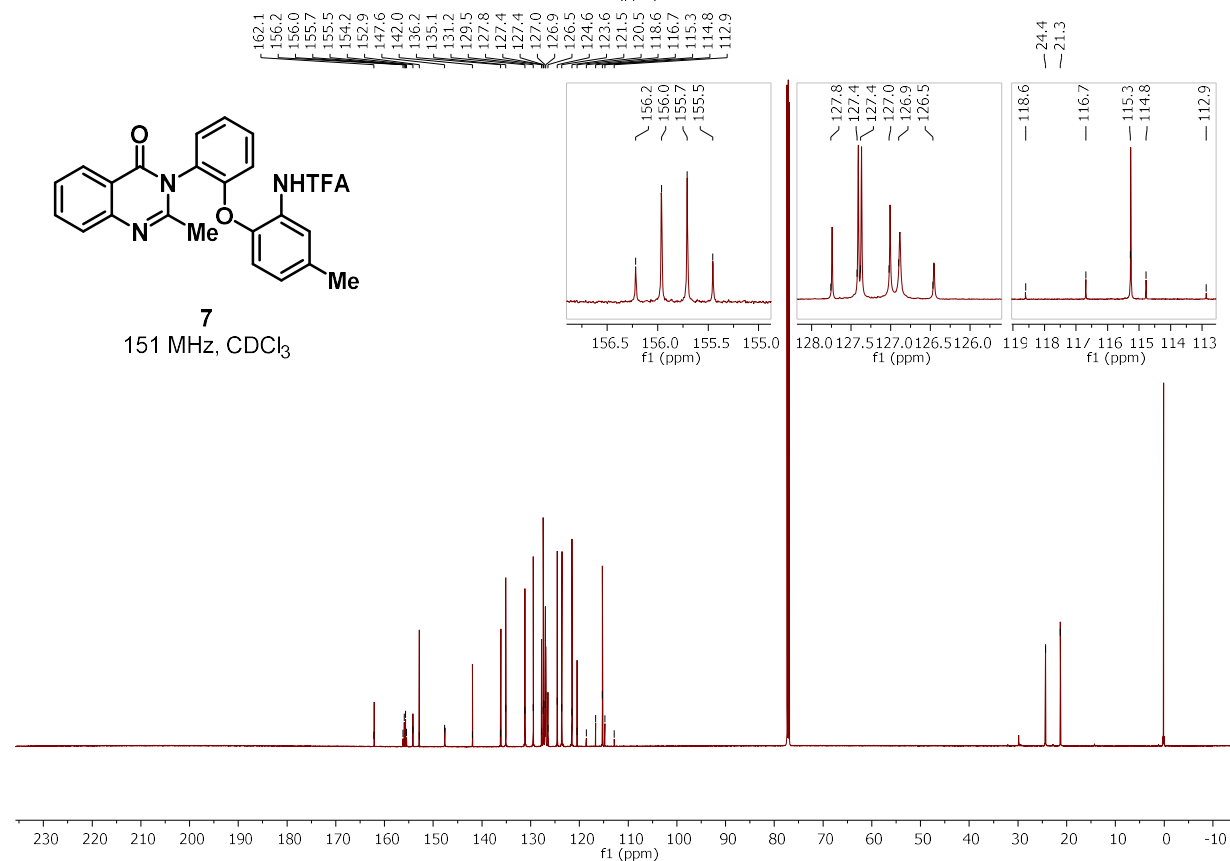

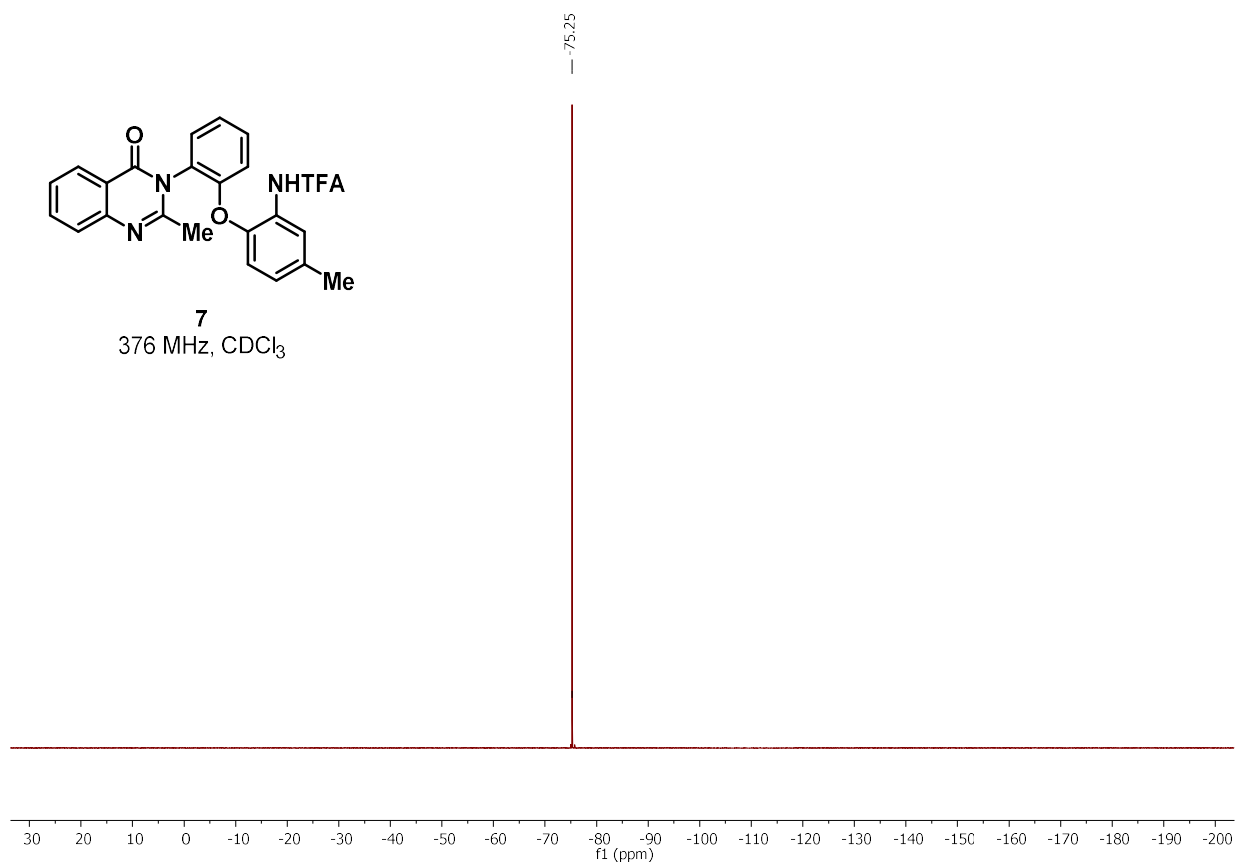

Supplement: NIHMS1789770-supplement-Supporting_Information.pdf [file NIHMS1789770-supplement-Supporting_Information.pdf]
